# Supplementary material for: Copper-catalyzed transfer methylenation via C(sp3)–C(sp3) bond cleavage of alcohols
Source: Royal Society of Chemistry journal article supplement (doi:10.1039/d2qo01373h), 2022-01-01
Supplement: d2qo01373h1.pdf [file d2qo01373h1.pdf]

## Supporting Information

# Copper-Catalyzed Transfer Methylenation *via* C(sp<sup>3</sup>)-C(sp<sup>3</sup>) Bond Cleavage of Alcohols

Chuan-Ming Hong, Xin Zhuang, Zhen Luo, Si-Qi Xiong, Zheng-Qiang Liu, Qing-Lin Li, Fei-Fei Zou, Qing-Hua Li,\* and Tang-Lin Liu\*

School of Chemistry and Chemical Engineering, Southwest University, Chongqing 400715, China.

### Contents:

|                                                                       |    |
|-----------------------------------------------------------------------|----|
| I. General information.....                                           | 1  |
| II. General procedure .....                                           | 1  |
| III. Optimization of reaction conditions.....                         | 3  |
| IV. Gram scale reaction.....                                          | 3  |
| V. Mechanism studies .....                                            | 4  |
| VI. The analytical and spectral characterization data .....           | 8  |
| VII. References .....                                                 | 32 |
| VIII. NMR spectra of the products .....                               | 33 |
| IX. The HRMS for the mixture of mechanism studies (experiment c)..... | 94 |

## I. General information

$^1\text{H}$  and  $^{13}\text{C}$  NMR spectra were recorded on a Bruker Avance 600 MHz and 400 MHz instruments. Chemical shifts were reported in parts per million (ppm), and the residual solvent peak was used as an internal reference: proton (chloroform  $\delta$  7.26), carbon (chloroform  $\delta$  77.0) or tetramethylsilane (TMS  $\delta$  0.00) was used as a reference. Multiplicity was indicated as follows: s (singlet), d (doublet), t (triplet), q (quartet), m (multiplet), dd (doublet of doublet), bs (broad singlet). Coupling constants were reported in Hertz (Hz). All high resolution mass spectra (HRMS) were obtained on a Bruker Apex-2. For thin layer chromatography (TLC), Qingdao Haiyang Chemical were used, and compounds were visualized with a UV light at 254 nm. Further visualization was achieved by staining with iodine, or potassium permanganate solution followed by heating using a heat gun. Flash chromatography separations were performed on Qingdao Haiyang Chemical 300-400 mesh silica gel. All reactions were carried out under a nitrogen atmosphere. All commercially available reagents were used as received for the reactions without any purification. All solvents were dried on alumina columns using a solvent dispensing system. And CuOTf comes from the vendor bidepharm. Alcohols<sup>1</sup>, trifluoromethyl ketones<sup>2,3</sup> and aldehydes<sup>4</sup> are commercially available or synthesized via the known procedures.

## II. General procedure

### Method A (preparation of product 3):

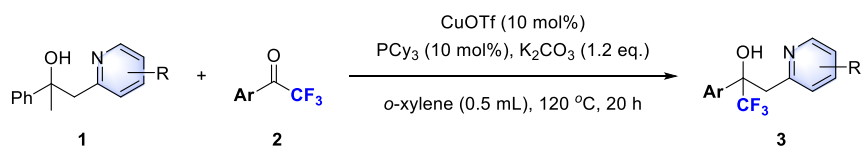

To a vial equipped with a dried stir bar was added alcohols **1** (0.1 mmol), ketones **2** (0.1 mmol), CuOTf (10 mol%), PCy<sub>3</sub> (10 mol%), K<sub>2</sub>CO<sub>3</sub> (0.12 mmol), *o*-xylene (0.5 mL) in the glovebox. The reaction mixture was taken outside the glovebox and allowed to stir at corresponding temperature for 20 hours. The reaction mixture was added to water (10 mL), extracted with EtOAc (3 × 5 mL). The organic layer was washed with aqueous

NaHCO<sub>3</sub> and brine and dried over Na<sub>2</sub>SO<sub>4</sub>. And the residue was purified by column chromatography with silica gel to give pure products.

**Method B (preparation of product 5):**

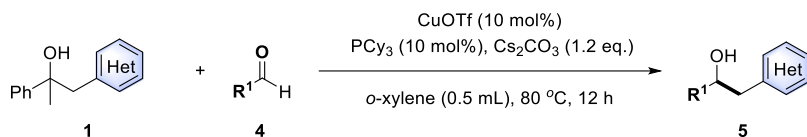

To a vial equipped with a dried stir bar was added alcohols **1** (0.1 mmol), aldehydes **4** (0.1 mmol), CuOTf (10 mol%), PCy<sub>3</sub> (10 mol%), Cs<sub>2</sub>CO<sub>3</sub> (0.12 mmol), *o*-xylene (0.5 mL) in the glovebox. The reaction mixture was taken outside the glovebox and allowed to stir at corresponding temperature for 12 hours. The reaction mixture was added to water (10 mL), extracted with EtOAc (3 × 5 mL). The organic layer was washed with aqueous NaHCO<sub>3</sub> and brine and dried over Na<sub>2</sub>SO<sub>4</sub>. And the residue was purified by column chromatography with silica gel to give pure products.

### III. Optimization of reaction conditions

Table S1: Optimization of reaction conditions for preparation of secondary alcohol (5ba)

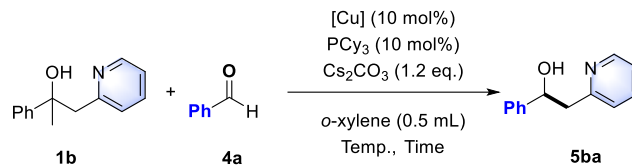

| Entry <sup>a</sup> | [Cu]                 | Temp.        | Time        | Yield (%) <sup>b</sup> |
|--------------------|----------------------|--------------|-------------|------------------------|
| 1                  | CuOTf                | 120 °C       | 20 h        | 43                     |
| 2                  | Cu(OTf) <sub>2</sub> | 120 °C       | 20 h        | 32                     |
| 3                  | CuCl                 | 120 °C       | 20 h        | 30                     |
| 4                  | Cu(OAc) <sub>2</sub> | 120 °C       | 20 h        | 31                     |
| 5                  | CuOTf                | 100 °C       | 20 h        | 47                     |
| 6                  | CuOTf                | 80 °C        | 20 h        | 55                     |
| 7                  | CuOTf                | 60 °C        | 20 h        | 45                     |
| 8                  | CuOTf                | 80 °C        | 24 h        | 44                     |
| <b>9</b>           | <b>CuOTf</b>         | <b>80 °C</b> | <b>12 h</b> | <b>69</b>              |
| 10 <sup>c</sup>    | -                    | 80 °C        | 12 h        | 0                      |
| 11 <sup>c</sup>    | CuOTf                | 80 °C        | 12 h        | 0                      |
| 12 <sup>d</sup>    | CuOTf                | 80 °C        | 12 h        | 0                      |

<sup>a</sup>The reaction was carried out with 0.1 mmol of **1b**, 0.1 mmol of **4a**, 0.01 mmol [Cu], 0.01 mmol PCy<sub>3</sub>, 1.2 equivalent Cs<sub>2</sub>CO<sub>3</sub> in 0.5 mL of *o*-xylene under N<sub>2</sub> at corresponding temperature and time. <sup>b</sup>Isolated yields. <sup>c</sup>Without PCy<sub>3</sub>. <sup>d</sup>Without Cs<sub>2</sub>CO<sub>3</sub>.

### IV. Gram scale reaction

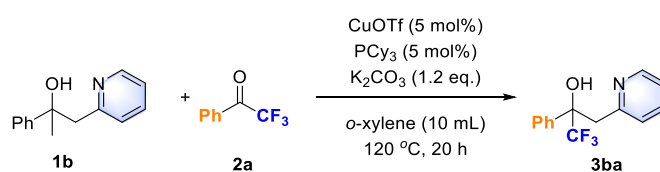

To a vial equipped with a dried stir bar was added 2-phenyl-1-(pyridin-2-yl)propan-2-ol **1b** (6 mmol), 2,2,2-trifluoro-1-phenylethan-1-one **2a** (6 mmol), CuOTf (5 mol%), PCy<sub>3</sub> (5 mol%), K<sub>2</sub>CO<sub>3</sub> (7.2 mmol), *o*-xylene (10 mL) in the glovebox. The reaction mixture was taken outside the glovebox and allowed to stir at corresponding temperature for 20 hours. The reaction mixture was added to water (30 mL), extracted with EtOAc (3 × 25 mL). The organic layer was washed with aqueous NaHCO<sub>3</sub> and brine and dried over Na<sub>2</sub>SO<sub>4</sub>. And the residue was purified by column



chromatography with silica gel to give 1.36 g of product **3ba** with 85% isolated yield.

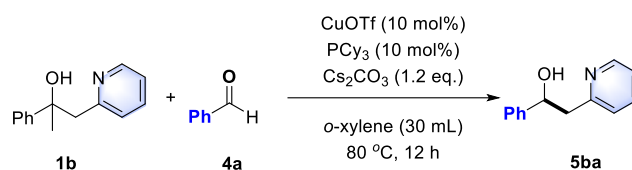

To a vial equipped with a dried stir bar was added 2-phenyl-1-(pyridin-2-yl)propan-2-ol **1b** (6 mmol), benzaldehyde **4a** (6 mmol), CuOTf (10 mol%), PCy<sub>3</sub> (10 mol%), Cs<sub>2</sub>CO<sub>3</sub> (7.2 mmol), *o*-xylene (30 mL) in the glovebox. The reaction mixture was taken outside the glovebox and allowed to stir at corresponding temperature for 12 hours. The reaction mixture was added to water (30 mL), extracted with EtOAc (3 × 25 mL). The organic layer was washed with aqueous NaHCO<sub>3</sub> and brine and dried over Na<sub>2</sub>SO<sub>4</sub>. And the residue was purified by column chromatography with silica gel to give 0.54 g of product **5ba** with 46% isolated yield.

## V. Mechanism studies

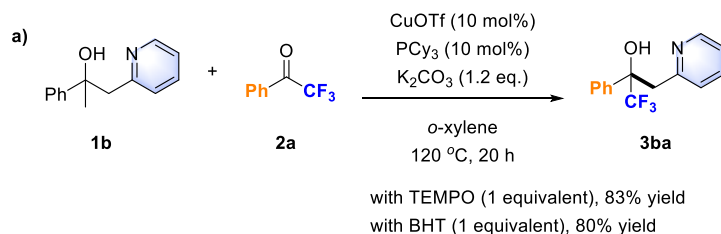

a) To a vial equipped with a dried stir bar was added 2-phenyl-1-(pyridin-2-yl)propan-2-ol **1b** (0.1 mmol), 2,2,2-trifluoro-1-phenylethan-1-one **2a** (0.1 mmol), CuOTf (10 mol%), PCy<sub>3</sub> (10 mol%), K<sub>2</sub>CO<sub>3</sub> (0.12 mmol), TEMPO (0.1 mmol) or BHT (0.1 mmol), *o*-xylene (0.5 mL) in the glovebox. The reaction mixture was taken outside the glovebox and allowed to stir at corresponding temperature for 20 hours. The reaction mixture was added to water (10 mL), extracted with EtOAc (3 × 5 mL). The organic layer was washed with aqueous NaHCO<sub>3</sub> and brine and dried over Na<sub>2</sub>SO<sub>4</sub>. And the residue was purified by column chromatography with silica gel to give product **3ba** with 83% isolated yield (with TEMPO) and 80% isolated yield (with BHT), which could rule out the free radical mechanistic pathways.

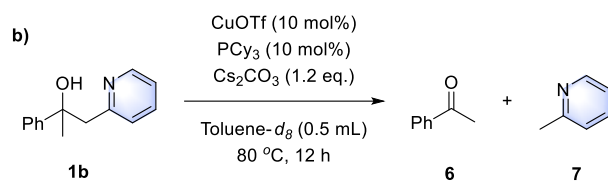

**b)** To a vial equipped with a dried stir bar was added 2-phenyl-1-(pyridin-2-yl)propan-2-ol **1b** (0.1 mmol), CuOTf (10 mol%), PCy<sub>3</sub> (10 mol%), Cs<sub>2</sub>CO<sub>3</sub> (0.12 mmol), toluene-*d*<sub>8</sub> (0.5 mL) in the glovebox. The reaction mixture was taken outside the glovebox and allowed to stir at corresponding temperature for 12 hours. The reaction mixture was detected by TLC, we found the starting substrate (compound **1b**) was decomposed with 100% conversion, and the decomposed products acetophenone **6** and 2-methylpyridine **7** were observed with >95% <sup>1</sup>HNMR yields. The <sup>1</sup>HNMR of the reaction mixture was also tested. The NMR shows that under the copper catalyst, 2-phenyl-1-(pyridin-2-yl)propan-2-ol **1b** could cleavage C(sp<sup>3</sup>)-C(sp<sup>3</sup>) bond, and led to 2-methylpyridine (ppm: 2.20, 8.24-8.20), acetophenone (ppm: 1.90) as it shown below. All these results support the cleavage C(sp<sup>3</sup>)-C(sp<sup>3</sup>) bond.

## The $^1\text{H}$ NMR of the reaction mixture of experiment b

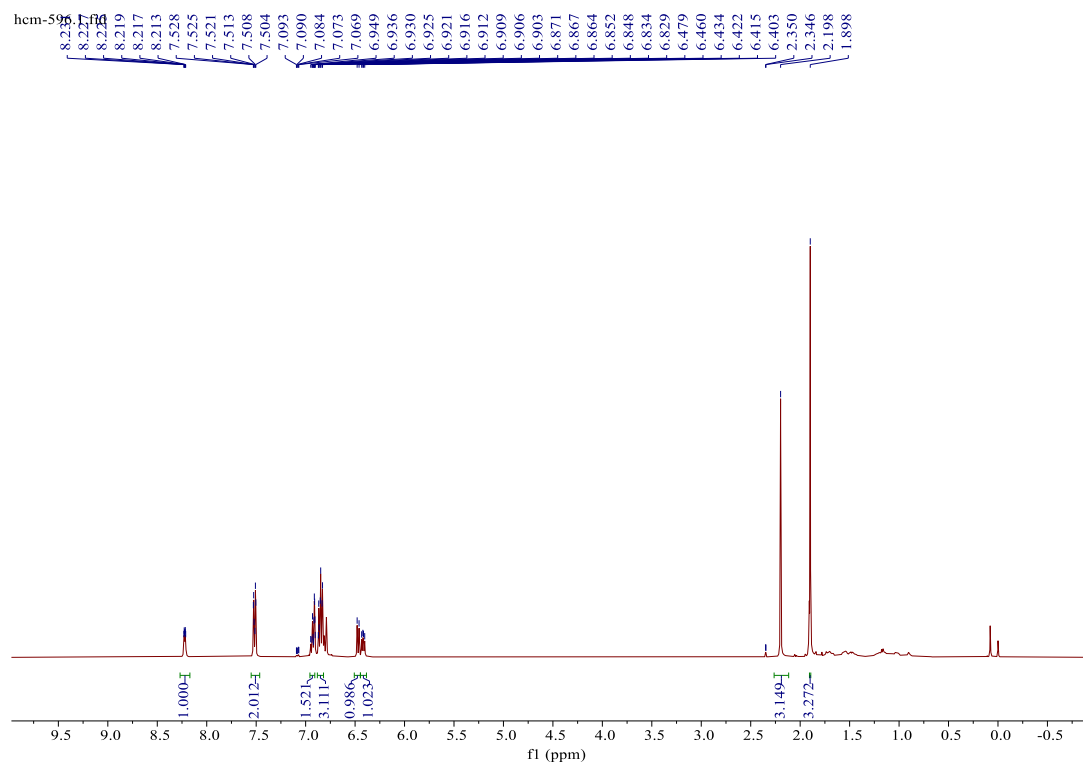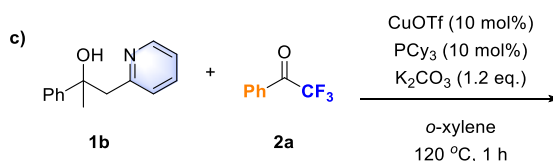

c) To a vial equipped with a dried stir bar was added 2-phenyl-1-(pyridin-2-yl)propan-2-ol **1b** (0.1 mmol), 2,2,2-trifluoro-1-phenylethan-1-one **2a** (0.1 mmol), CuOTf (10 mol%), PCy<sub>3</sub> (10 mol%), K<sub>2</sub>CO<sub>3</sub> (0.12 mmol), *o*-xylene (0.5 mL) in the glovebox. The reaction mixture was taken outside the glovebox and allowed to stir at corresponding temperature for 1 hour. The crude reaction mixture was given HRMS. As it shown below (for more details see part IX), we found the fragment of starting materials **1b**, some intermediates e.g. **I-V** and **7**, and product **3ba**. All these results could prove the formation of Cu-C(2-pyridine methyl) bond.

## The HRMS for the mixture of experiment c

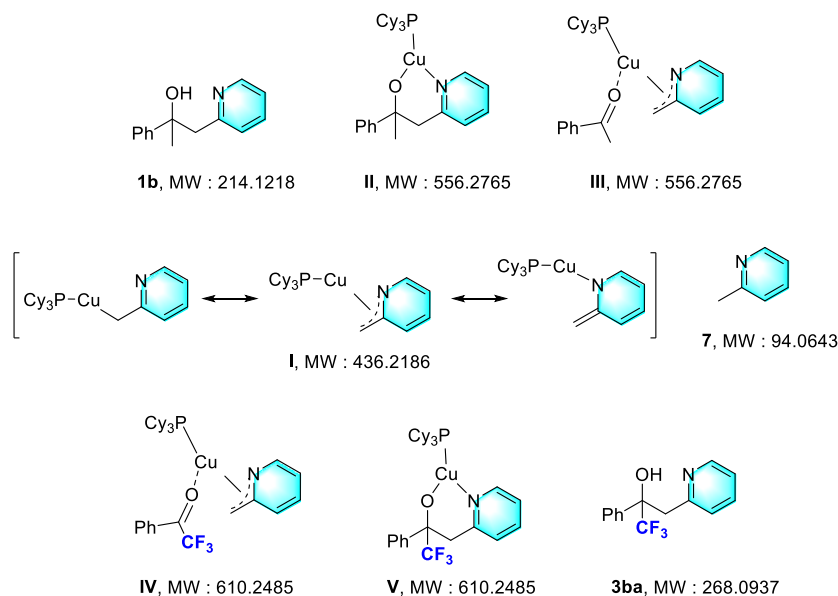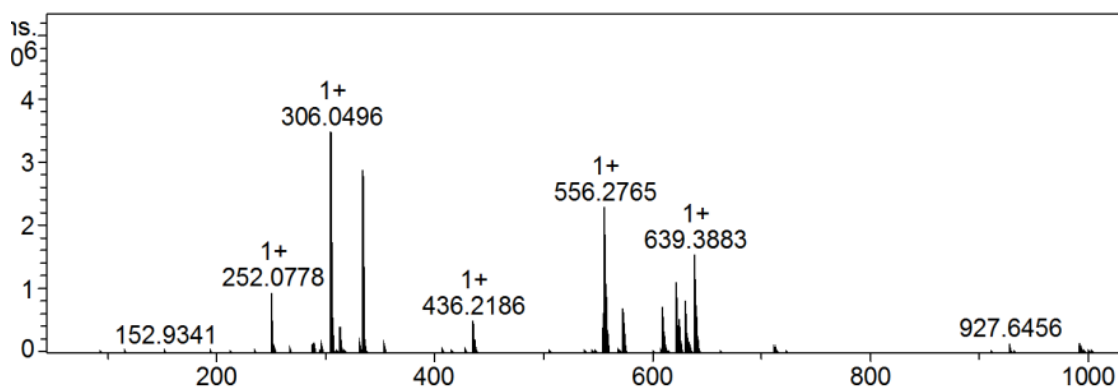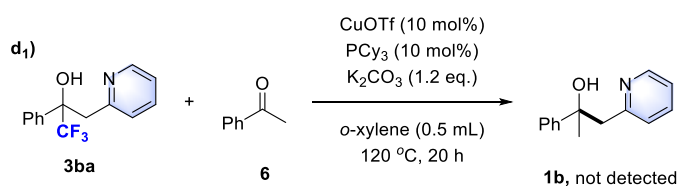

**d<sub>1</sub>) Method A:** To a vial equipped with a dried stir bar was added 1,1,1-trifluoro-2-phenyl-3-(pyridin-2-yl)propan-2-ol **3ba** (0.1 mmol), acetophenone **6** (0.1 mmol), CuOTf (10 mol%), PCy<sub>3</sub> (10 mol%), K<sub>2</sub>CO<sub>3</sub> (0.12 mmol), *o*-xylene (0.5 mL) in the glovebox. The reaction mixture was taken outside the glovebox and allowed to stir at corresponding temperature for 20 hours. The reaction mixture was detected by TLC, all the starting materials were recovered.

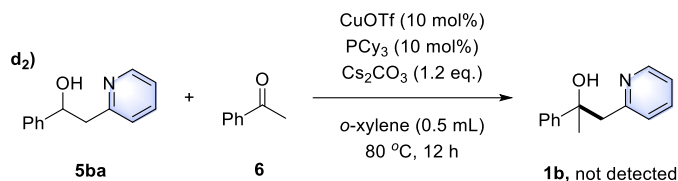

**d<sub>2</sub>) Method B:** To a vial equipped with a dried stir bar was added 1-phenyl-2-(pyridin-2-yl)ethan-1-ol **5ba** (0.1 mmol), acetophenone **6** (0.1 mmol), CuOTf (10 mol%), PCy<sub>3</sub> (10 mol%), Cs<sub>2</sub>CO<sub>3</sub> (0.12 mmol), *o*-xylene (0.5 mL) in the glovebox. The reaction mixture was taken outside the glovebox and allowed to stir at corresponding temperature for 12 hours. The reaction mixture was detected by TLC, most of the starting materials were recovered and trace amounts of by-products such as 2-styrylpyridine, 1-phenyl-2-(pyridin-2-yl)ethan-1-one and 2-methylpyridine were obtained with low conversion.

## VI. The analytical and spectral characterization data

### 1,1,1-trifluoro-2-phenyl-3-(pyridin-2-yl)propan-2-ol (**3ba**)<sup>5</sup>

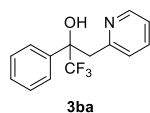

The title compound was prepared according to the general procedure as described, silica gel flash column chromatography was performed using hexanes and ethyl acetate (30:1) (*R<sub>f</sub>* = 0.60 in hexane:ethyl acetate = 10:1) resulting in 22.1 mg of yellow solid in 83% yield.

<sup>1</sup>H NMR (400 MHz, CDCl<sub>3</sub>) δ 8.40-8.36 (m, 1H), 8.05 (s, 1H), 7.67-7.61 (m, 2H), 7.56 (td, *J* = 8.0 Hz, 2.0 Hz, 1H), 7.34-7.27 (m, 2H), 7.27-7.21 (m, 1H), 7.13-7.08 (m, 2H), 3.60 (d, *J* = 14.8 Hz, 1H), 3.47 (d, *J* = 14.8 Hz, 1H).

<sup>13</sup>C NMR (101 MHz, CDCl<sub>3</sub>) δ 157.15, 148.10, 138.58, 137.53, 128.26, 128.16, 126.86, 125.41 (q, *J* = 286.6 Hz), 124.72, 122.28, 77.42 (q, *J* = 28.4 Hz), 40.09.

<sup>19</sup>F NMR (376 MHz, CDCl<sub>3</sub>) δ -79.16.

### 1,1,1-trifluoro-3-(pyridin-2-yl)-2-(*p*-tolyl)propan-2-ol (**3bb**)

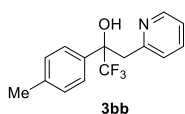

The title compound was prepared according to the general procedure as described, silica gel flash column chromatography was performed using hexanes and ethyl acetate (30:1) (*R<sub>f</sub>* = 0.43 in hexane:ethyl acetate = 10:1)

resulting in 19.7 mg of yellow solid in 70% yield, melting point 74-76 °C.

<sup>1</sup>H NMR (600 MHz, CDCl<sub>3</sub>) δ 8.39 (d, *J* = 5.4 Hz, 1H), 7.98 (s, 1H), 7.59-7.54 (m, 1H), 7.50 (d, *J* = 7.8 Hz, 2H), 7.14-7.07 (m, 4H), 3.58 (d, *J* = 14.4 Hz, 1H), 3.45 (d, *J* = 15.0 Hz, 1H), 2.29 (s, 3H).

<sup>13</sup>C NMR (151 MHz, CDCl<sub>3</sub>) δ 157.30, 148.12, 137.98, 137.49, 135.62, 128.91, 126.77, 125.46 (q, *J* = 285.8 Hz), 124.73, 122.24, 77.34 (q, *J* = 28.4 Hz), 40.10, 21.12.

<sup>19</sup>F NMR (376 MHz, CDCl<sub>3</sub>) δ -79.37.

HRMS (*m/z*): [M+H]<sup>+</sup> calcd for C<sub>15</sub>H<sub>15</sub>F<sub>3</sub>NO 282.1100, found 282.1100.

### 1,1,1-trifluoro-2-(4-methoxyphenyl)-3-(pyridin-2-yl)propan-2-ol (3bc)

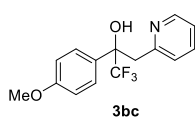

The title compound was prepared according to the general procedure as described, silica gel flash column chromatography was performed using hexanes and ethyl acetate (30:1) (*R<sub>f</sub>* = 0.30 in hexane:ethyl

acetate = 10:1) resulting in 25.2 mg of yellow solid in 85% yield, melting point 77-79 °C.

<sup>1</sup>H NMR (600 MHz, CDCl<sub>3</sub>) δ 8.39 (d, *J* = 5.4 Hz, 1H), 7.98 (s, 1H), 7.60-7.55 (m, 1H), 7.53 (d, *J* = 8.4 Hz, 2H), 7.14-7.08 (m, 2H), 6.88-6.79 (m, 2H), 3.76 (s, 3H), 3.57 (d, *J* = 14.4 Hz, 1H), 3.45 (d, *J* = 15.0 Hz, 1H).

<sup>13</sup>C NMR (151 MHz, CDCl<sub>3</sub>) δ 159.52, 157.29, 148.12, 137.50, 130.60, 128.17, 125.46 (q, *J* = 285.8 Hz), 124.75, 122.23, 113.55, 77.17 (q, *J* = 28.4 Hz), 55.29, 40.07.

<sup>19</sup>F NMR (376 MHz, CDCl<sub>3</sub>) δ -79.63.

HRMS (*m/z*): [M+H]<sup>+</sup> calcd for C<sub>15</sub>H<sub>15</sub>F<sub>3</sub>NO<sub>2</sub> 298.1049, found 298.1051.

### 1,1,1-trifluoro-2-(4-fluorophenyl)-3-(pyridin-2-yl)propan-2-ol (3bd)

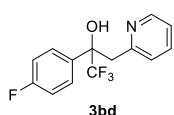

The title compound was prepared according to the general procedure as described, silica gel flash column chromatography was performed using hexanes and ethyl acetate (30:1) (*R<sub>f</sub>* = 0.43 in hexane:ethyl

acetate = 10:1) resulting in 21.1 mg of yellow solid in 74% yield, melting point 79-81 °C.

$^1\text{H}$  NMR (600 MHz,  $\text{CDCl}_3$ )  $\delta$  8.39 (d,  $J = 4.8$  Hz, 1H), 8.12 (s, 1H), 7.63-7.59 (m, 3H), 7.16-7.12 (m, 1H), 7.11 (d,  $J = 7.8$  Hz, 1H), 6.97 (t,  $J = 9.0$  Hz, 2H), 3.59 (d,  $J = 15.0$  Hz, 1H), 3.44 (d,  $J = 15.0$  Hz, 1H).

$^{13}\text{C}$  NMR (101 MHz,  $\text{CDCl}_3$ )  $\delta$  162.72 (d,  $J = 248.0$  Hz), 156.91, 148.12, 137.65, 134.37 (d,  $J = 3.2$  Hz), 128.81 (d,  $J = 8.3$  Hz), 125.26 (q,  $J = 286.3$  Hz), 124.72, 122.41, 115.08 (d,  $J = 21.6$  Hz), 77.17 (q,  $J = 28.7$  Hz), 39.99.

$^{19}\text{F}$  NMR (376 MHz,  $\text{CDCl}_3$ )  $\delta$  -79.52, -114.44.

HRMS ( $m/z$ ):  $[\text{M}+\text{H}]^+$  calcd for  $\text{C}_{14}\text{H}_{12}\text{F}_4\text{NO}$  286.0850, found 286.0849.

### 2-(4-chlorophenyl)-1,1,1-trifluoro-3-(pyridin-2-yl)propan-2-ol (3be)

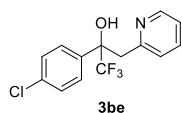

The title compound was prepared according to the general procedure as described, silica gel flash column chromatography was performed using hexanes and ethyl acetate (30:1) ( $R_f = 0.43$  in hexane:ethyl acetate = 10:1) resulting in 24.1 mg of yellow oil in 80% yield.

$^1\text{H}$  NMR (600 MHz,  $\text{CDCl}_3$ )  $\delta$  8.39 (d,  $J = 5.4$  Hz, 1H), 8.13 (s, 1H), 7.61-7.57 (m, 1H), 7.56 (d,  $J = 8.4$  Hz, 2H), 7.32-7.21 (m, 2H), 7.16-7.12 (m, 1H), 7.10 (d,  $J = 7.8$  Hz, 1H), 3.58 (d,  $J = 15.0$  Hz, 1H), 3.43 (d,  $J = 15.0$  Hz, 1H).

$^{13}\text{C}$  NMR (101 MHz,  $\text{DMSO}-d_6$ )  $\delta$  156.34, 148.55, 137.43, 136.83, 133.51, 129.45, 128.33, 125.78 (q,  $J = 287.9$  Hz), 125.40, 122.65, 76.84 (q,  $J = 27.8$  Hz), 40.18.

$^{19}\text{F}$  NMR (376 MHz,  $\text{CDCl}_3$ )  $\delta$  -79.44.

HRMS ( $m/z$ ):  $[\text{M}+\text{H}]^+$  calcd for  $\text{C}_{14}\text{H}_{12}\text{ClF}_3\text{NO}$  302.0554, found 302.0550.

### 2-(4-bromophenyl)-1,1,1-trifluoro-3-(pyridin-2-yl)propan-2-ol (3bf)

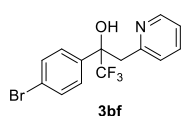

The title compound was prepared according to the general procedure as described, silica gel flash column chromatography was performed using hexanes and ethyl acetate (30:1) ( $R_f = 0.43$  in hexane:ethyl acetate = 10:1) resulting in 19.7 mg of yellow solid in 57% yield, melting point 84-86  $^{\circ}\text{C}$ .

$^1\text{H}$  NMR (400 MHz,  $\text{CDCl}_3$ )  $\delta$  8.40-8.36 (m, 1H), 7.59 (td,  $J = 7.6$  Hz, 1.6 Hz, 1H),

7.51-7.47 (m, 2H), 7.44-7.42 (m, 1H), 7.42-7.39 (m, 1H), 7.17-7.12 (m, 1H), 7.10 (d,  $J = 7.6$  Hz, 1H), 3.58 (d,  $J = 15.2$  Hz, 1H), 3.42 (d,  $J = 15.2$  Hz, 1H).

$^{13}\text{C}$  NMR (101 MHz,  $\text{CDCl}_3$ )  $\delta$  156.77, 148.16, 137.75, 137.70, 131.37, 130.08 (q,  $J = 286.7$  Hz), 128.77, 124.71, 122.69, 122.47, 77.28 (q,  $J = 28.4$  Hz), 39.75.

$^{19}\text{F}$  NMR (376 MHz,  $\text{CDCl}_3$ )  $\delta$  -79.39.

HRMS ( $m/z$ ):  $[\text{M}+\text{H}]^+$  calcd for  $\text{C}_{14}\text{H}_{12}\text{BrF}_3\text{NO}$  346.0049, found 346.0047.

### 2-([1,1'-biphenyl]-4-yl)-1,1,1-trifluoro-3-(pyridin-2-yl)propan-2-ol (3bg)

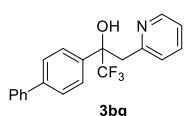

The title compound was prepared according to the general procedure as described, silica gel flash column chromatography was performed using hexanes and ethyl acetate (30:1) ( $R_f = 0.52$  in hexane:ethyl acetate = 10:1) resulting in 30.8 mg of yellow solid in 90% yield, melting point 79-81

$^{\circ}\text{C}$ .

$^1\text{H}$  NMR (400 MHz,  $\text{CDCl}_3$ )  $\delta$  8.41 (d,  $J = 4.8$  Hz, 1H), 7.70 (d,  $J = 8.0$  Hz, 2H), 7.64-7.57 (m, 1H), 7.59-7.50 (m, 4H), 7.46-7.37 (m, 2H), 7.36-7.29 (m, 1H), 7.17-7.10 (m, 2H), 3.64 (d,  $J = 15.2$  Hz, 1H), 3.51 (d,  $J = 15.2$  Hz, 1H).

$^{13}\text{C}$  NMR (101 MHz,  $\text{DMSO}-d_6$ )  $\delta$  156.72, 148.52, 140.26, 139.81, 137.49, 137.10, 129.38, 128.08, 127.11, 126.56, 126.00 (q,  $J = 287.9$  Hz), 125.43, 122.64, 77.21 (q,  $J = 28.3$  Hz), 40.18.

$^{19}\text{F}$  NMR (376 MHz,  $\text{CDCl}_3$ )  $\delta$  -79.09.

HRMS ( $m/z$ ):  $[\text{M}+\text{H}]^+$  calcd for  $\text{C}_{20}\text{H}_{17}\text{F}_3\text{NO}$  344.1257, found 344.1255.

### 1,1,1-trifluoro-3-(pyridin-2-yl)-2-(*m*-tolyl)propan-2-ol (3bh)

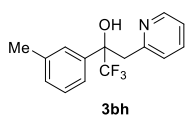

The title compound was prepared according to the general procedure as described, silica gel flash column chromatography was performed using hexanes and ethyl acetate (30:1) ( $R_f = 0.48$  in hexane:ethyl acetate = 10:1) resulting in 23.0 mg of white oil in 82% yield.

$^1\text{H}$  NMR (400 MHz,  $\text{CDCl}_3$ )  $\delta$  8.48-8.33 (m, 1H), 8.04 (s, 1H), 7.59 (td,  $J = 8.0$  Hz, 2.0 Hz, 1H), 7.46 (s, 1H), 7.40 (d,  $J = 8.0$  Hz, 1H), 7.19 (t,  $J = 7.6$  Hz, 1H), 7.15-7.09 (m,



2H), 7.09-7.04 (m, 1H), 3.59 (d,  $J = 14.8$  Hz, 1H), 3.45 (d,  $J = 14.8$  Hz, 1H), 2.33 (s, 3H).

$^{13}\text{C}$  NMR (101 MHz,  $\text{CDCl}_3$ )  $\delta$  157.21, 148.04, 138.51, 137.78, 137.57, 129.03, 128.01, 127.55, 125.47 (q,  $J = 286.8$  Hz), 124.72, 123.82, 122.28, 77.37 (q,  $J = 28.3$  Hz), 40.19, 21.67.

$^{19}\text{F}$  NMR (376 MHz,  $\text{CDCl}_3$ )  $\delta$  -78.98.

HRMS ( $m/z$ ):  $[\text{M}+\text{H}]^+$  calcd for  $\text{C}_{15}\text{H}_{15}\text{F}_3\text{NO}$  282.1100, found 282.1100.

### 2-(3-chlorophenyl)-1,1,1-trifluoro-3-(pyridin-2-yl)propan-2-ol (3bi)

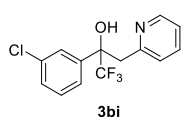

The title compound was prepared according to the general procedure as described, silica gel flash column chromatography was performed using hexanes and ethyl acetate (30:1) ( $R_f = 0.45$  in hexane:ethyl

acetate = 10:1) resulting in 28.0 mg of yellow oil in 93% yield.

$^1\text{H}$  NMR (400 MHz,  $\text{CDCl}_3$ )  $\delta$  8.45-8.36 (m, 1H), 8.20 (s, 1H), 7.65 (s, 1H), 7.63-7.57 (m, 1H), 7.53-7.45 (m, 1H), 7.25-7.21 (m, 2H), 7.18-7.08 (m, 2H), 3.59 (d,  $J = 15.2$  Hz, 1H), 3.42 (d,  $J = 14.8$  Hz, 1H).

$^{13}\text{C}$  NMR (101 MHz,  $\text{CDCl}_3$ )  $\delta$  156.69, 148.14, 140.80, 137.73, 134.41, 129.44, 128.55, 127.37, 125.12 (q,  $J = 286.8$  Hz), 125.03, 124.70, 122.49, 77.20 (q,  $J = 29.3$  Hz), 39.86.

$^{19}\text{F}$  NMR (376 MHz,  $\text{CDCl}_3$ )  $\delta$  -79.15.

HRMS ( $m/z$ ):  $[\text{M}+\text{H}]^+$  calcd for  $\text{C}_{14}\text{H}_{12}\text{ClF}_3\text{NO}$  302.0554, found 302.0553.

### 2-(3,5-difluorophenyl)-1,1,1-trifluoro-3-(pyridin-2-yl)propan-2-ol (3bj)

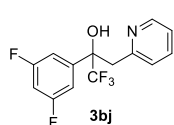

The title compound was prepared according to the general procedure as described, silica gel flash column chromatography was performed using hexanes and ethyl acetate (30:1) ( $R_f = 0.45$  in hexane:ethyl

acetate = 10:1) resulting in 24.2 mg of white solid in 80% yield, melting point 73-75 °C.

$^1\text{H}$  NMR (400 MHz,  $\text{CDCl}_3$ )  $\delta$  8.42-8.39 (m, 1H), 8.36-8.22 (m, 1H), 7.62 (td,  $J = 7.6$  Hz, 1.6 Hz, 1H), 7.22-7.09 (m, 4H), 6.70 (tt,  $J = 8.8$  Hz, 2.0 Hz, 1H), 3.57 (d,  $J = 14.8$  Hz, 1H), 3.38 (d,  $J = 15.2$  Hz, 1H).

$^{13}\text{C}$  NMR (101 MHz,  $\text{CDCl}_3$ )  $\delta$  163.00 (d,  $J = 249.1$  Hz), 162.88 (d,  $J = 249.1$  Hz), 156.38, 148.19, 142.87 (t,  $J = 8.6$  Hz), 137.85, 124.88 (q,  $J = 286.8$  Hz), 124.69, 122.63, 110.34 (d,  $J = 19.6$  Hz), 110.27 (d,  $J = 19.4$  Hz), 103.88 (t,  $J = 25.5$  Hz), 77.23 (q,  $J = 28.5$  Hz), 39.77.

$^{19}\text{F}$  NMR (376 MHz,  $\text{CDCl}_3$ )  $\delta$  -79.20, -109.50.

HRMS ( $m/z$ ):  $[\text{M}+\text{H}]^+$  calcd for  $\text{C}_{14}\text{H}_{11}\text{F}_5\text{NO}$  304.0755, found 304.0753.

### 1,1,1-trifluoro-2-(4-methoxy-2-methylphenyl)-3-(pyridin-2-yl)propan-2-ol (3bk)

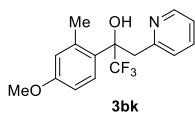

The title compound was prepared according to the general procedure as described, silica gel flash column chromatography was performed using hexanes and ethyl acetate (30:1) ( $R_f = 0.21$  in hexane:ethyl

acetate = 10:1) resulting in 15.2 mg of yellow oil in 49% yield.

$^1\text{H}$  NMR (400 MHz,  $\text{CDCl}_3$ )  $\delta$  8.41-8.34 (m, 1H), 7.61 (td,  $J = 8.0$  Hz, 2.0 Hz, 1H), 7.43-7.31 (m, 1H), 7.19 (d,  $J = 8.0$  Hz, 1H), 7.15-7.08 (m, 1H), 6.64-6.58 (m, 2H), 3.73 (s, 3H), 3.66 (d,  $J = 15.2$  Hz, 1H), 3.59 (d,  $J = 15.2$  Hz, 1H), 2.60 (s, 3H).

$^{13}\text{C}$  NMR (101 MHz,  $\text{CDCl}_3$ )  $\delta$  159.02, 157.76, 148.05, 140.76, 137.50, 129.90, 127.93, 125.94 (q,  $J = 287.5$  Hz), 124.78, 122.19, 118.51, 110.51, 79.74 (q,  $J = 28.6$  Hz), 55.14, 40.43, 23.47.

$^{19}\text{F}$  NMR (376 MHz,  $\text{CDCl}_3$ )  $\delta$  -79.03.

HRMS ( $m/z$ ):  $[\text{M}+\text{H}]^+$  calcd for  $\text{C}_{16}\text{H}_{17}\text{F}_3\text{NO}_2$  312.1206, found 312.1204.

### 1,1,1-trifluoro-2-(naphthalen-2-yl)-3-(pyridin-2-yl)propan-2-ol (3bl)

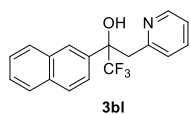

The title compound was prepared according to the general procedure as described, silica gel flash column chromatography was performed using hexanes and ethyl acetate (30:1) ( $R_f = 0.55$  in hexane:ethyl

acetate = 10:1) resulting in 28.5 mg of yellow solid in 90% yield, melting point

75-77°C.

$^1\text{H}$  NMR (400 MHz,  $\text{CDCl}_3$ )  $\delta$  8.40-8.36 (m, 1H), 8.17-8.14 (m, 1H), 7.85-7.82 (m, 1H), 7.81-7.76 (m, 2H), 7.75-7.70 (m, 1H), 7.54 (td,  $J = 7.6$  Hz, 1.6 Hz, 1H), 7.47 (dt,  $J = 9.6$  Hz, 3.6 Hz, 2H), 7.14 (d,  $J = 7.6$  Hz, 1H), 7.10-7.06 (m, 1H), 3.71 (d,  $J = 14.8$  Hz, 1H), 3.60 (d,  $J = 15.2$  Hz, 1H).

$^{13}\text{C}$  NMR (101 MHz,  $\text{CDCl}_3$ )  $\delta$  157.02, 148.05, 137.62, 135.97, 133.09, 133.04, 128.61, 127.84, 127.56, 126.85, 126.52, 126.23, 125.48 (q,  $J = 286.8$  Hz), 124.74, 124.26, 122.33, 77.64 (q,  $J = 28.4$  Hz), 40.04.

$^{19}\text{F}$  NMR (376 MHz,  $\text{CDCl}_3$ )  $\delta$  -78.96.

HRMS ( $m/z$ ):  $[\text{M}+\text{H}]^+$  calcd for  $\text{C}_{18}\text{H}_{15}\text{F}_3\text{NO}$  318.1100, found 318.1100.

### 1,1,1-trifluoro-3-(pyridin-2-yl)-2-(thiophen-2-yl)propan-2-ol (3bm)<sup>5</sup>

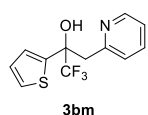

The title compound was prepared according to the general procedure as described, silica gel flash column chromatography was performed using hexanes and ethyl acetate (30:1) ( $R_f = 0.67$  in hexane:ethyl acetate = 10:1)

resulting in 23.2 mg of yellow solid in 85% yield.

$^1\text{H}$  NMR (400 MHz,  $\text{CDCl}_3$ )  $\delta$  8.52 (s, 1H), 8.46-8.37 (m, 1H), 7.60 (td,  $J = 8.0$  Hz, 2.0 Hz, 1H), 7.21 (dd,  $J = 5.2$  Hz, 1.6 Hz, 1H), 7.18-7.13 (m, 1H), 7.11 (d,  $J = 7.6$  Hz, 1H), 7.08 (d,  $J = 4.0$  Hz, 1H), 6.92 (dd,  $J = 4.8$  Hz, 3.6 Hz, 1H), 3.58 (d,  $J = 14.8$  Hz, 1H), 3.42 (d,  $J = 14.8$  Hz, 1H).

$^{13}\text{C}$  NMR (101 MHz,  $\text{DMSO}-d_6$ )  $\delta$  156.35, 148.49, 142.54, 137.49, 127.47, 127.00, 126.41, 125.45, 125.36 (q,  $J = 287.0$  Hz), 122.73, 76.56 (q,  $J = 29.2$  Hz), 41.30.

$^{19}\text{F}$  NMR (376 MHz,  $\text{CDCl}_3$ )  $\delta$  -80.58.

### 2-(benzo[*b*]thiophen-2-yl)-1,1,1-trifluoro-3-(pyridin-2-yl)propan-2-ol (3bn)

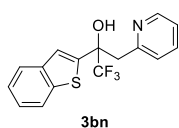

The title compound was prepared according to the general procedure as described, silica gel flash column chromatography was performed using hexanes and ethyl acetate (30:1) ( $R_f = 0.41$  in hexane:ethyl acetate = 10:1)

resulting in 29.7 mg of yellow solid in 92% yield, melting point 79-81

°C.

$^1\text{H}$  NMR (600 MHz,  $\text{CDCl}_3$ )  $\delta$  8.74 (s, 1H), 8.44-8.32 (m, 1H), 7.75 (d,  $J = 7.8$  Hz, 1H), 7.69 (d,  $J = 7.8$  Hz, 1H), 7.57 (td,  $J = 7.8$  Hz, 1.8 Hz, 1H), 7.35 (s, 1H), 7.31-7.23 (m, 2H), 7.18-7.10 (m, 2H), 3.63 (d,  $J = 15.0$  Hz, 1H), 3.49 (d,  $J = 15.0$  Hz, 1H).

$^{13}\text{C}$  NMR (101 MHz,  $\text{CDCl}_3$ )  $\delta$  156.55, 148.01, 144.11, 140.08, 139.72, 137.79, 124.87, 124.72 (q,  $J = 286.4$  Hz), 124.48, 124.31, 123.86, 122.66, 122.55, 122.26, 77.16 (q,  $J = 30.1$  Hz), 40.50.

$^{19}\text{F}$  NMR (376 MHz,  $\text{CDCl}_3$ )  $\delta$  -80.13.

HRMS ( $m/z$ ):  $[\text{M}+\text{H}]^+$  calcd for  $\text{C}_{16}\text{H}_{13}\text{F}_3\text{NOS}$  324.0664, found 324.0664.

### 1,1,1-trifluoro-3-(pyridin-2-yl)-2-(quinolin-6-yl)propan-2-ol (3bo)

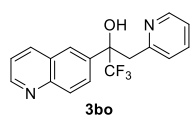

The title compound was prepared according to the general procedure as described, silica gel flash column chromatography was performed using hexanes and ethyl acetate (30:1) ( $R_f = 0.15$  in hexane:ethyl acetate = 10:1) resulting in 20.7 mg of yellow oil in 65% yield.

$^1\text{H}$  NMR (400 MHz,  $\text{CDCl}_3$ )  $\delta$  8.89 (s, 1H), 8.42-8.33 (m, 1H), 8.28 (s, 1H), 8.19-8.12 (m, 2H), 8.05 (d,  $J = 8.8$  Hz, 1H), 7.97-7.90 (m, 1H), 7.56 (td,  $J = 7.6$  Hz, 2.0 Hz, 1H), 7.39 (dd,  $J = 8.4$  Hz, 4.4 Hz, 1H), 7.19-7.07 (m, 2H), 3.71 (d,  $J = 15.2$  Hz, 1H), 3.59 (d,  $J = 14.8$  Hz, 1H).

$^{13}\text{C}$  NMR (101 MHz,  $\text{DMSO}-d_6$ )  $\delta$  156.42, 151.62, 148.55, 147.64, 137.40, 136.90, 136.02, 128.81, 128.57, 127.52, 127.48, 126.00 (q,  $J = 288.5$  Hz), 125.41, 122.62, 122.21, 77.20 (q,  $J = 27.7$  Hz), 40.38.

$^{19}\text{F}$  NMR (376 MHz,  $\text{CDCl}_3$ )  $\delta$  -78.94.

HRMS ( $m/z$ ):  $[\text{M}+\text{H}]^+$  calcd for  $\text{C}_{17}\text{H}_{14}\text{F}_3\text{N}_2\text{O}$  319.1053, found 319.1049.

### 2-ferrocenyl-1,1,1-trifluoro-3-(pyridin-2-yl)propan-2-ol (3bp)

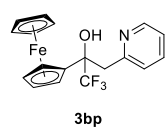

The title compound was prepared according to the general procedure as described, silica gel flash column chromatography was performed using hexanes and ethyl acetate (30:1) ( $R_f = 0.55$  in hexane:ethyl acetate =

10:1) resulting in 18.0 mg of yellow solid in 48% yield, melting point 104-106 °C.

<sup>1</sup>H NMR (400 MHz, CDCl<sub>3</sub>) δ 8.55-8.50 (m, 1H), 7.89 (s, 1H), 7.69 (td, *J* = 7.6 Hz, 2.0 Hz, 1H), 7.25-7.22 (m, 1H), 7.18 (d, *J* = 8.0 Hz, 1H), 4.56-4.43 (m, 1H), 4.25-4.19 (m, 6H), 4.17-4.13 (m, 2H), 3.60 (d, *J* = 14.8 Hz, 1H), 3.40 (d, *J* = 14.8 Hz, 1H).

<sup>13</sup>C NMR (101 MHz, CDCl<sub>3</sub>) δ 157.89, 148.18, 137.64, 125.60 (q, *J* = 289.8 Hz), 124.38, 122.29, 90.23, 75.37 (q, *J* = 27.9 Hz), 69.19, 68.13, 67.75, 67.41, 66.74, 41.18.

<sup>19</sup>F NMR (376 MHz, CDCl<sub>3</sub>) δ -78.08.

HRMS (*m/z*): [M+H]<sup>+</sup> calcd for C<sub>18</sub>H<sub>17</sub>F<sub>3</sub>FeNO 376.0606, found 376.0601.

### 1,1,1-trifluoro-3-(6-methylpyridin-2-yl)-2-phenylpropan-2-ol (3ca)<sup>6</sup>

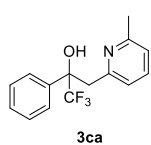

The title compound was prepared according to the general procedure as described, silica gel flash column chromatography was performed using hexanes and ethyl acetate (30:1) (*R<sub>f</sub>* = 0.80 in hexane:ethyl acetate = 10:1)

resulting in 16.9 mg of yellow solid in 60% yield.

<sup>1</sup>H NMR (400 MHz, CDCl<sub>3</sub>) δ 8.47 (s, 1H), 7.71-7.58 (m, 2H), 7.45 (t, *J* = 7.6 Hz, 1H), 7.34-7.28 (m, 2H), 7.27-7.22 (m, 1H), 6.96 (d, *J* = 7.6 Hz, 1H), 6.91 (d, *J* = 7.6 Hz, 1H), 3.55 (d, *J* = 14.8 Hz, 1H), 3.41 (d, *J* = 14.8 Hz, 1H), 2.46 (s, 3H).

<sup>13</sup>C NMR (101 MHz, CDCl<sub>3</sub>) δ 157.21, 156.36, 138.78, 137.74, 128.20, 128.14, 126.88, 125.46 (q, *J* = 286.7 Hz), 121.89, 121.60, 77.36 (q, *J* = 28.2 Hz), 39.90, 24.17.

<sup>19</sup>F NMR (376 MHz, CDCl<sub>3</sub>) δ -79.12.

### 1,1,1-trifluoro-3-(6-fluoropyridin-2-yl)-2-phenylpropan-2-ol (3da)

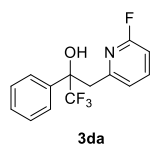

The title compound was prepared according to the general procedure as described, silica gel flash column chromatography was performed using hexanes and ethyl acetate (30:1) (*R<sub>f</sub>* = 0.70 in hexane:ethyl acetate = 10:1)

resulting in 16.5 mg of yellow solid in 58% yield, melting point 84-86 °C.

<sup>1</sup>H NMR (400 MHz, CDCl<sub>3</sub>) δ 7.69-7.62 (m, 1H), 7.62-7.58 (m, 2H), 7.36-7.24 (m, 3H), 6.98 (dd, *J* = 7.2 Hz, 2.0 Hz, 1H), 6.76 (dd, *J* = 8.0 Hz, 2.4 Hz, 1H), 6.50 (s, 1H), 3.56 (d, *J* = 15.2 Hz, 1H), 3.48 (d, *J* = 15.2 Hz, 1H).

$^{13}\text{C}$  NMR (101 MHz,  $\text{CDCl}_3$ )  $\delta$  162.38 (d,  $J = 245.23$  Hz), 155.57 (d,  $J = 11.6$  Hz), 142.28 (d,  $J = 8.1$  Hz), 137.80, 128.49, 128.30, 126.78, 125.21 (q,  $J = 286.7$  Hz), 121.95 (d,  $J = 4.2$  Hz), 108.22 (d,  $J = 35.0$  Hz), 77.38 (q,  $J = 28.8$  Hz), 40.35.

$^{19}\text{F}$  NMR (376 MHz,  $\text{CDCl}_3$ )  $\delta$  -67.27, -79.18.

HRMS ( $m/z$ ):  $[\text{M}+\text{H}]^+$  calcd for  $\text{C}_{14}\text{H}_{12}\text{F}_4\text{NO}$  286.0850, found 286.0849.

### 3-(6-chloropyridin-2-yl)-1,1,1-trifluoro-2-phenylpropan-2-ol (3ea)

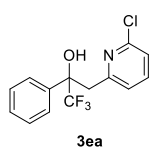

The title compound was prepared according to the general procedure as described, silica gel flash column chromatography was performed using hexanes and ethyl acetate (30:1) ( $R_f = 0.67$  in hexane:ethyl acetate = 10:1)

resulting in 16.8 mg of white solid in 56% yield, melting point 95-97  $^\circ\text{C}$ .

$^1\text{H}$  NMR (400 MHz,  $\text{CDCl}_3$ )  $\delta$  7.64-7.57 (m, 2H), 7.52 (t,  $J = 7.6$  Hz, 1H), 7.35-7.24 (m, 3H), 7.15 (d,  $J = 8.0$  Hz, 1H), 7.01 (d,  $J = 7.6$  Hz, 1H), 6.74 (s, 1H), 3.57 (d,  $J = 14.8$  Hz, 1H), 3.47 (d,  $J = 15.2$  Hz, 1H).

$^{13}\text{C}$  NMR (101 MHz,  $\text{CDCl}_3$ )  $\delta$  157.59, 150.31, 139.85, 137.85, 128.48, 128.31, 126.74, 125.24 (q,  $J = 286.7$  Hz), 123.16, 123.01, 77.58 (q,  $J = 28.7$  Hz), 40.51.

$^{19}\text{F}$  NMR (376 MHz,  $\text{CDCl}_3$ )  $\delta$  -79.10.

HRMS ( $m/z$ ):  $[\text{M}+\text{H}]^+$  calcd for  $\text{C}_{14}\text{H}_{12}\text{ClF}_3\text{NO}$  302.0554, found 302.0553.

### 3-(4-chloropyridin-2-yl)-1,1,1-trifluoro-2-phenylpropan-2-ol (3fa)

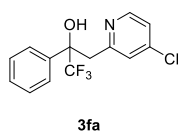

The title compound was prepared according to the general procedure as described, silica gel flash column chromatography was performed using hexanes and ethyl acetate (30:1) ( $R_f = 0.65$  in hexane:ethyl acetate = 10:1)

resulting in 17.0 mg of yellow oil in 56% yield.

$^1\text{H}$  NMR (600 MHz,  $\text{CDCl}_3$ )  $\delta$  8.30 (d,  $J = 5.4$  Hz, 1H), 7.66-7.58 (m, 3H), 7.33 (t,  $J = 7.8$  Hz, 2H), 7.28 (d,  $J = 7.2$  Hz, 1H), 7.16 (s, 1H), 3.59 (d,  $J = 15.0$  Hz, 1H), 3.46 (d,  $J = 15.0$  Hz, 1H).

$^{13}\text{C}$  NMR (151 MHz,  $\text{CDCl}_3$ )  $\delta$  158.71, 149.06, 145.59, 138.19, 128.48, 128.32, 126.78, 125.28 (q,  $J = 286.0$  Hz), 125.03, 122.86, 77.36 (q,  $J = 28.5$  Hz), 40.24.

$^{19}\text{F}$  NMR (565 MHz,  $\text{CDCl}_3$ )  $\delta$  -79.13.

HRMS ( $m/z$ ):  $[\text{M}+\text{H}]^+$  calcd for  $\text{C}_{14}\text{H}_{12}\text{ClF}_3\text{NO}$  302.0554, found 302.0552.

### 1-phenyl-2-(pyridin-2-yl)ethan-1-ol (5ba)<sup>7</sup>

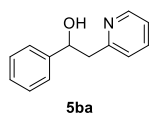

The title compound was prepared according to the general procedure as described, silica gel flash column chromatography was performed using hexanes and ethyl acetate (10:1) ( $R_f$  = 0.31 in hexane:ethyl acetate = 3:1)

resulting in 13.7 mg of colorless solid in 69% yield.

$^1\text{H}$  NMR (400 MHz,  $\text{CDCl}_3$ )  $\delta$  8.53 (d,  $J$  = 4.0 Hz, 1H), 7.61 (td,  $J$  = 7.6 Hz, 2.0 Hz, 1H), 7.46-7.39 (m, 2H), 7.34 (t,  $J$  = 7.6 Hz, 2H), 7.28-7.22 (m, 1H), 7.20-7.15 (m, 1H), 7.10 (d,  $J$  = 7.6 Hz, 1H), 5.66 (s, 1H), 5.17 (dd,  $J$  = 8.0 Hz, 4.0 Hz, 1H), 3.21-3.02 (m, 2H).

$^{13}\text{C}$  NMR (101 MHz,  $\text{CDCl}_3$ )  $\delta$  159.94, 148.74, 144.24, 136.96, 128.44, 127.40, 125.98, 123.94, 121.83, 73.48, 45.88.

### 1-(4-chlorophenyl)-2-(pyridin-2-yl)ethan-1-ol (5bb)<sup>7</sup>

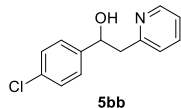

The title compound was prepared according to the general procedure as described, silica gel flash column chromatography was performed using hexanes and ethyl acetate (10:1) ( $R_f$  = 0.20 in hexane:ethyl

acetate = 3:1) resulting in 9.6 mg of white solid in 41% yield.

$^1\text{H}$  NMR (600 MHz,  $\text{CDCl}_3$ )  $\delta$  8.57-8.46 (m, 1H), 7.65-7.58 (m, 1H), 7.40-7.28 (m, 4H), 7.21-7.17 (m, 1H), 7.09 (d,  $J$  = 7.8 Hz, 1H), 5.92 (s, 1H), 5.15 (t,  $J$  = 6.0 Hz, 1H), 3.09 (d,  $J$  = 6.0 Hz, 2H).

$^{13}\text{C}$  NMR (151 MHz,  $\text{CDCl}_3$ )  $\delta$  159.57, 148.70, 142.77, 137.08, 133.00, 128.56, 127.37, 123.95, 121.97, 72.81, 45.58.

### 2-(pyridin-2-yl)-1-(*p*-tolyl)ethan-1-ol (5bc)<sup>7</sup>

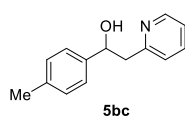

The title compound was prepared according to the general procedure as described, silica gel flash column chromatography was performed using hexanes and ethyl acetate (10:1) ( $R_f$  = 0.25 in hexane:ethyl

acetate = 3:1) resulting in 13.6 mg of white solid in 64% yield.

$^1\text{H}$  NMR (400 MHz,  $\text{CDCl}_3$ )  $\delta$  8.56-8.47 (m, 1H), 7.61 (td,  $J = 7.6$  Hz, 2.0 Hz, 1H), 7.38-7.28 (m, 2H), 7.21-7.12 (m, 3H), 7.11 (d,  $J = 7.6$  Hz, 1H), 5.54 (s, 1H), 5.14 (dd,  $J = 8.8$  Hz, 3.6 Hz, 1H), 3.36-2.51 (m, 2H), 2.35 (s, 3H).

$^{13}\text{C}$  NMR (101 MHz,  $\text{CDCl}_3$ )  $\delta$  160.01, 148.73, 141.31, 136.96, 136.91, 129.11, 125.91, 123.94, 121.77, 73.32, 45.96, 21.22.

### 1-([1,1'-biphenyl]-4-yl)-2-(pyridin-2-yl)ethan-1-ol (5bd)

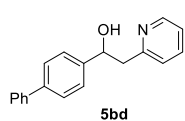

The title compound was prepared according to the general procedure as described, silica gel flash column chromatography was performed using hexanes and ethyl acetate (10:1) ( $R_f = 0.28$  in hexane:ethyl

acetate = 3:1) resulting in 12.4 mg of white solid in 45% yield, melting point 129-131  $^\circ\text{C}$ .

$^1\text{H}$  NMR (400 MHz,  $\text{CDCl}_3$ )  $\delta$  8.57-8.53 (m, 1H), 7.64 (dd,  $J = 7.6$  Hz, 2.0 Hz, 1H), 7.62-7.56 (m, 4H), 7.51-7.48 (m, 2H), 7.45-7.40 (m, 2H), 7.37-7.30 (m, 1H), 7.21-7.17 (m, 1H), 7.13 (d,  $J = 7.6$  Hz, 1H), 5.73 (s, 1H), 5.22 (dd,  $J = 8.0$  Hz, 4.0 Hz, 1H), 3.29-3.02 (m, 2H).

$^{13}\text{C}$  NMR (101 MHz,  $\text{CDCl}_3$ )  $\delta$  159.93, 148.77, 143.31, 141.18, 140.37, 137.03, 128.87, 127.31, 127.24, 126.44, 123.99, 121.90, 73.27, 45.78.

HRMS ( $m/z$ ):  $[\text{M}+\text{H}]^+$  calcd for  $\text{C}_{19}\text{H}_{18}\text{NO}$  276.1383, found 276.1382.

### 1-(4-(*tert*-butyl)phenyl)-2-(pyridin-2-yl)ethan-1-ol (5be)

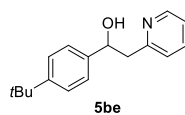

The title compound was prepared according to the general procedure as described, silica gel flash column chromatography was performed using hexanes and ethyl acetate (10:1) ( $R_f = 0.38$  in hexane:ethyl

acetate = 3:1) resulting in 8.4 mg of yellow solid in 33% yield, melting point 67-69  $^\circ\text{C}$ .

$^1\text{H}$  NMR (400 MHz,  $\text{CDCl}_3$ )  $\delta$  8.59-8.49 (m, 1H), 7.62 (td,  $J = 7.6$  Hz, 2.0 Hz, 1H), 7.41-7.36 (m, 4H), 7.20-7.16 (m, 1H), 7.15-7.11 (m, 1H), 5.14 (dd,  $J = 9.2$  Hz, 3.2 Hz, 1H), 3.26-2.89 (m, 2H), 1.33 (s, 9H).



$^{13}\text{C}$  NMR (101 MHz,  $\text{CDCl}_3$ )  $\delta$  160.13, 150.36, 148.77, 141.20, 136.93, 125.74, 125.38, 123.95, 121.79, 73.30, 45.87, 34.63, 31.53.

HRMS ( $m/z$ ):  $[\text{M}+\text{H}]^+$  calcd for  $\text{C}_{17}\text{H}_{22}\text{NO}$  256.1696, found 256.1696.

#### 1-(4-(methylthio)phenyl)-2-(pyridin-2-yl)ethan-1-ol (5bf)

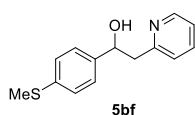

The title compound was prepared according to the general procedure as described, silica gel flash column chromatography was performed using hexanes and ethyl acetate (10:1) ( $R_f = 0.29$  in hexane:ethyl acetate = 3:1) resulting in 13.7 mg of yellow solid in 56% yield, melting point 114-116  $^\circ\text{C}$ .

$^1\text{H}$  NMR (400 MHz,  $\text{CDCl}_3$ )  $\delta$  8.56-8.49 (m, 1H), 7.61 (td,  $J = 7.6$  Hz, 2.0 Hz, 1H), 7.38-7.30 (m, 2H), 7.25-7.22 (m, 2H), 7.20-7.15 (m, 1H), 7.10 (d,  $J = 7.6$  Hz, 1H), 5.70 (s, 1H), 5.13 (dd,  $J = 7.6$  Hz, 4.0 Hz, 1H), 3.12-3.06 (m, 2H), 2.47 (s, 3H).

$^{13}\text{C}$  NMR (101 MHz,  $\text{CDCl}_3$ )  $\delta$  159.82, 148.73, 141.36, 137.25, 137.01, 127.00, 126.55, 123.96, 121.88, 73.08, 45.71, 16.26.

HRMS ( $m/z$ ):  $[\text{M}+\text{H}]^+$  calcd for  $\text{C}_{14}\text{H}_{16}\text{NOS}$  246.0947, found 246.0947.

#### 4-(1-hydroxy-2-(pyridin-2-yl)ethyl)benzotrile (5bg)<sup>7</sup>

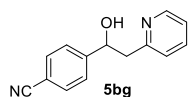

The title compound was prepared according to the general procedure as described, silica gel flash column chromatography was performed using hexanes and ethyl acetate (10:1) ( $R_f = 0.28$  in hexane:ethyl acetate = 3:1) resulting in 10.0 mg of white solid in 45% yield.

$^1\text{H}$  NMR (600 MHz,  $\text{CDCl}_3$ )  $\delta$  8.53 (d,  $J = 5.4$  Hz, 1H), 7.66-7.60 (m, 3H), 7.53 (d,  $J = 7.8$  Hz, 2H), 7.23-7.19 (m, 1H), 7.09 (d,  $J = 7.2$  Hz, 1H), 5.25-5.19 (m, 1H), 3.18-2.96 (m, 2H).

$^{13}\text{C}$  NMR (151 MHz,  $\text{CDCl}_3$ )  $\delta$  159.20, 149.66, 148.76, 137.26, 132.34, 126.72, 123.94, 122.19, 119.06, 111.23, 72.81, 45.08.

#### 4-(1-hydroxy-2-(pyridin-2-yl)ethyl)benzaldehyde (5bh)

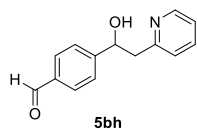

The title compound was prepared according to the general procedure as described, silica gel flash column chromatography was performed using hexanes and ethyl acetate (10:1) ( $R_f = 0.28$  in hexane:ethyl acetate = 3:1) resulting in 8.0 mg of white oil in 35% yield.

$^1\text{H NMR}$  (600 MHz,  $\text{CDCl}_3$ )  $\delta$  10.00 (s, 1H), 8.54 (d,  $J = 4.8$ , 1H), 7.86 (d,  $J = 7.2$  Hz, 2H), 7.66-57 (m, 3H), 7.21 (t,  $J = 6.0$  Hz, 1H), 7.10 (d,  $J = 7.8$  Hz, 1H), 5.26 (dd,  $J = 9.0$  Hz, 3.6 Hz, 1H), 3.20-3.17 (m, 2H).

$^{13}\text{C NMR}$  (101 MHz,  $\text{CDCl}_3$ )  $\delta$  192.20, 159.34, 151.20, 148.69, 137.24, 135.72, 130.04, 126.57, 123.96, 122.14, 73.07, 45.16.

HRMS ( $m/z$ ):  $[\text{M}+\text{H}]^+$  calcd for  $\text{C}_{14}\text{H}_{14}\text{NO}_2$  228.1019, found 228.1017.

### 1-(2-chlorophenyl)-2-(pyridin-2-yl)ethan-1-ol (5bi)

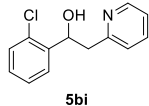

The title compound was prepared according to the general procedure as described, silica gel flash column chromatography was performed using hexanes and ethyl acetate (10:1) ( $R_f = 0.42$  in hexane:ethyl acetate = 3:1)

resulting in 18.4 mg of yellow oil in 79% yield.

$^1\text{H NMR}$  (400 MHz,  $\text{CDCl}_3$ )  $\delta$  8.55-8.51 (m, 1H), 7.66 (dd,  $J = 7.6$  Hz, 1.6 Hz, 1H), 7.62 (td,  $J = 7.6$  Hz, 1.6 Hz, 1H), 7.33 (dd,  $J = 7.6$  Hz, 1.2 Hz, 1H), 7.29-7.24 (m, 1H), 7.21-7.16 (m, 2H), 7.12 (d,  $J = 8.0$  Hz, 1H), 5.50 (dd,  $J = 8.8$  Hz, 2.4 Hz, 1H), 3.25 (dd,  $J = 15.2$  Hz, 2.4 Hz, 1H), 3.00 (dd,  $J = 14.8$  Hz, 8.8 Hz, 1H).

$^{13}\text{C NMR}$  (101 MHz,  $\text{CDCl}_3$ )  $\delta$  159.83, 148.63, 141.49, 137.12, 131.54, 129.30, 128.34, 127.63, 127.13, 123.89, 121.96, 70.23, 43.53.

HRMS ( $m/z$ ):  $[\text{M}+\text{H}]^+$  calcd for  $\text{C}_{13}\text{H}_{13}\text{ClNO}$  234.0680, found 234.0679.

### 1-(3-chlorophenyl)-2-(pyridin-2-yl)ethan-1-ol (5bj)

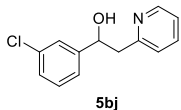

The title compound was prepared according to the general procedure as described, silica gel flash column chromatography was performed using hexanes and ethyl acetate (10:1) ( $R_f = 0.50$  in hexane:ethyl acetate = 3:1)

resulting in 13.7 mg of yellow solid in 59% yield, melting point 95-97 °C.

$^1\text{H}$  NMR (400 MHz,  $\text{CDCl}_3$ )  $\delta$  8.55-8.49 (m, 1H), 7.65-7.59 (m, 1H), 7.45-7.42 (m, 1H), 7.32-7.15 (m, 4H), 7.10 (d,  $J = 8.0$  Hz, 1H), 5.93 (s, 1H), 5.14 (t,  $J = 6.4$  Hz, 1H), 3.10 (d,  $J = 6.0$  Hz, 2H).

$^{13}\text{C}$  NMR (101 MHz,  $\text{CDCl}_3$ )  $\delta$  159.58, 148.73, 146.38, 137.12, 134.41, 129.72, 127.50, 126.27, 124.14, 123.94, 122.01, 72.85, 45.47.

HRMS ( $m/z$ ):  $[\text{M}+\text{H}]^+$  calcd for  $\text{C}_{13}\text{H}_{13}\text{ClNO}$  234.0680, found 234.0680.

### 1-(3-methoxyphenyl)-2-(pyridin-2-yl)ethan-1-ol (5bk)

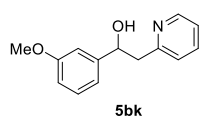

The title compound was prepared according to the general procedure as described, silica gel flash column chromatography was performed using hexanes and ethyl acetate (10:1) ( $R_f = 0.11$  in hexane:ethyl acetate = 3:1) resulting in 14.9 mg of yellow solid in 65% yield, melting point 58-60  $^\circ\text{C}$ .

$^1\text{H}$  NMR (400 MHz,  $\text{CDCl}_3$ )  $\delta$  8.56-8.51 (m, 1H), 7.62 (td,  $J = 7.6$  Hz, 1.6 Hz, 1H), 7.28-7.23 (m, 1H), 7.20-7.15 (m, 1H), 7.11 (d,  $J = 7.6$  Hz, 1H), 7.04-6.96 (m, 2H), 6.82-6.78 (m, 1H), 5.65 (s, 1H), 5.15 (dd,  $J = 7.2$  Hz, 4.8 Hz, 1H), 3.81 (s, 3H), 3.25-2.99 (m, 2H).

$^{13}\text{C}$  NMR (101 MHz,  $\text{CDCl}_3$ )  $\delta$  159.94, 159.91, 148.75, 145.99, 137.00, 129.45, 123.98, 121.87, 118.34, 113.18, 111.40, 73.41, 55.38, 45.83.

HRMS ( $m/z$ ):  $[\text{M}+\text{H}]^+$  calcd for  $\text{C}_{14}\text{H}_{16}\text{NO}_2$  230.1176, found 230.1177.

### 1-(naphthalen-1-yl)-2-(pyridin-2-yl)ethan-1-ol (5bl)<sup>8</sup>

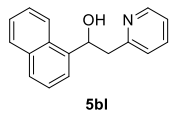

The title compound was prepared according to the general procedure as described, silica gel flash column chromatography was performed using hexanes and ethyl acetate (10:1) ( $R_f = 0.40$  in hexane:ethyl acetate = 3:1) resulting in 19.4 mg of yellow solid in 78% yield, melting point 110-112  $^\circ\text{C}$ .

$^1\text{H}$  NMR (400 MHz,  $\text{CDCl}_3$ )  $\delta$  8.66-8.57 (m, 1H), 8.18-8.09 (m, 1H), 7.91-7.85 (m, 1H), 7.82-7.73 (m, 2H), 7.65-7.59 (m, 1H), 7.55-7.44 (m, 3H), 7.22 (dd,  $J = 7.6$  Hz, 4.8 Hz, 1H), 7.11 (d,  $J = 8.0$  Hz, 1H), 5.99-5.94 (m, 1H), 5.87 (s, 1H), 3.53-2.83 (m, 2H).

$^{13}\text{C}$  NMR (101 MHz,  $\text{CDCl}_3$ )  $\delta$  160.15, 148.88, 139.64, 137.03, 133.95, 130.40, 129.11, 127.84, 126.07, 125.76, 125.45, 123.89, 123.36, 123.14, 121.94, 70.21, 45.04.

#### 1-(furan-2-yl)-2-(pyridin-2-yl)ethan-1-ol (5bm)<sup>7</sup>

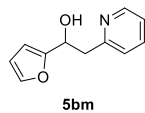

The title compound was prepared according to the general procedure as described, silica gel flash column chromatography was performed using hexanes and ethyl acetate (10:1) ( $R_f$  = 0.15 in hexane:ethyl acetate = 3:1) resulting in 12.7 mg of yellow oil in 67% yield.

$^1\text{H}$  NMR (400 MHz,  $\text{CDCl}_3$ )  $\delta$  8.54-8.49 (m, 1H), 7.63 (td,  $J$  = 8.0 Hz, 2.0 Hz, 1H), 7.37 (dd,  $J$  = 2.0 Hz, 0.8 Hz, 1H), 7.21-7.12 (m, 2H), 6.31 (dd,  $J$  = 3.2 Hz, 1.6 Hz, 1H), 6.24-6.22 (m, 1H), 5.20 (dd,  $J$  = 8.4 Hz, 3.6 Hz, 1H), 3.39-3.16 (m, 2H).

$^{13}\text{C}$  NMR (101 MHz,  $\text{CDCl}_3$ )  $\delta$  159.52, 156.48, 148.72, 141.86, 137.01, 123.97, 121.91, 110.26, 105.96, 67.47, 41.94.

#### 2-(pyridin-2-yl)-1-(thiophen-2-yl)ethan-1-ol (5bn)

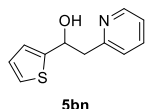

The title compound was prepared according to the general procedure as described, silica gel flash column chromatography was performed using hexanes and ethyl acetate (10:1) ( $R_f$  = 0.30 in hexane:ethyl acetate = 3:1) resulting in 16.0 mg of yellow solid in 78% yield, melting point 48-50 °C.

$^1\text{H}$  NMR (400 MHz,  $\text{CDCl}_3$ )  $\delta$  8.53-8.49 (m, 1H), 7.63 (td,  $J$  = 7.6 Hz, 1.6 Hz, 1H), 7.21 (dd,  $J$  = 4.8 Hz, 1.2 Hz, 1H), 7.20-7.16 (m, 1H), 7.14 (d,  $J$  = 8.0 Hz, 1H), 7.00-6.89 (m, 2H), 5.97 (s, 1H), 5.44 (t,  $J$  = 5.6 Hz, 1H), 3.26 (d,  $J$  = 6.0 Hz, 2H).

$^{13}\text{C}$  NMR (101 MHz,  $\text{CDCl}_3$ )  $\delta$  159.46, 148.71, 148.37, 137.04, 126.64, 124.32, 124.06, 123.26, 121.97, 69.76, 45.56.

HRMS ( $m/z$ ):  $[\text{M}+\text{H}]^+$  calcd for  $\text{C}_{11}\text{H}_{12}\text{NOS}$  206.0634, found 206.0633.

#### (*E*)-4-phenyl-1-(pyridin-2-yl)but-3-en-2-ol (5bo)<sup>8</sup>

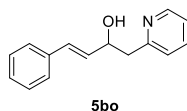

The title compound was prepared according to the general procedure as described, silica gel flash column chromatography was performed

using hexanes and ethyl acetate (10:1) ( $R_f = 0.20$  in hexane:ethyl acetate = 3:1) resulting in 17.8 mg of yellow solid in 79% yield.

$^1\text{H NMR}$  (400 MHz,  $\text{CDCl}_3$ )  $\delta$  8.56-8.47 (m, 1H), 7.63 (td,  $J = 7.6$  Hz, 1.6 Hz, 1H), 7.43-7.34 (m, 2H), 7.32-7.27 (m, 2H), 7.24-7.20 (m, 1H), 7.20-7.14 (m, 2H), 6.67 (dd,  $J = 16.0$  Hz, 1.2 Hz, 1H), 6.30 (dd,  $J = 16.0$  Hz, 6.0 Hz, 1H), 5.39 (s, 1H), 4.81-4.72 (m, 1H), 3.36-2.66 (m, 2H).

$^{13}\text{C NMR}$  (101 MHz,  $\text{CDCl}_3$ )  $\delta$  159.83, 148.78, 137.17, 136.95, 131.82, 130.12, 128.63, 127.58, 126.63, 123.98, 121.81, 71.90, 43.80.

### **(E)-3-methyl-4-phenyl-1-(pyridin-2-yl)but-3-en-2-ol (5bp)**

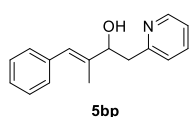

The title compound was prepared according to the general procedure as described, silica gel flash column chromatography was performed using hexanes and ethyl acetate (10:1) ( $R_f = 0.27$  in hexane:ethyl acetate = 3:1) resulting in 12.2 mg of yellow oil in 51% yield.

$^1\text{H NMR}$  (400 MHz,  $\text{CDCl}_3$ )  $\delta$  8.58-8.48 (m, 1H), 7.64 (t,  $J = 7.2$  Hz, 1H), 7.31 (t,  $J = 7.6$  Hz, 2H), 7.25 (d,  $J = 8.0$  Hz, 2H), 7.22-7.14 (m, 3H), 6.59 (s, 1H), 4.61 (t,  $J = 6.0$  Hz, 1H), 3.07 (d,  $J = 6.0$  Hz, 2H), 1.94 (s, 3H).

$^{13}\text{C NMR}$  (101 MHz,  $\text{CDCl}_3$ )  $\delta$  160.11, 148.79, 139.58, 138.05, 137.00, 129.14, 128.17, 126.40, 125.55, 123.92, 121.81, 76.64, 42.41, 14.43.

HRMS ( $m/z$ ):  $[\text{M}+\text{H}]^+$  calcd for  $\text{C}_{16}\text{H}_{18}\text{NO}$  240.1383, found 240.1377.

### **1-cyclohexyl-2-(pyridin-2-yl)ethan-1-ol (5bq)<sup>8</sup>**

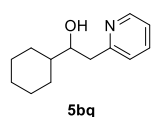

The title compound was prepared according to the general procedure as described, silica gel flash column chromatography was performed using hexanes and ethyl acetate (10:1) ( $R_f = 0.54$  in hexane:ethyl acetate = 3:1) resulting in 10.9 mg of yellow solid in 53% yield.

$^1\text{H NMR}$  (400 MHz,  $\text{CDCl}_3$ )  $\delta$  8.68-8.23 (m, 1H), 7.60 (td,  $J = 7.6$  Hz, 2.0 Hz, 1H), 7.20-6.88 (m, 2H), 4.94 (s, 1H), 3.86-3.74 (m, 1H), 3.23-2.46 (m, 2H), 2.22-1.92 (m, 1H), 1.80-1.68 (m, 3H), 1.72-1.64 (m, 1H), 1.47-1.34 (m, 1H), 1.32-1.01 (m, 5H).

$^{13}\text{C}$  NMR (101 MHz,  $\text{CDCl}_3$ )  $\delta$  161.01, 148.70, 136.80, 123.86, 121.49, 75.36, 43.69, 40.58, 29.17, 28.63, 26.75, 26.48, 26.39.

### 1-cyclopropyl-2-(pyridin-2-yl)ethan-1-ol (5br)

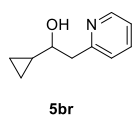

The title compound was prepared according to the general procedure as described, silica gel flash column chromatography was performed using hexanes and ethyl acetate (10:1) ( $R_f$  = 0.15 in hexane:ethyl acetate = 3:1) resulting in 10.9 mg of yellow oil in 67% yield.

$^1\text{H}$  NMR (400 MHz,  $\text{CDCl}_3$ )  $\delta$  8.56-8.40 (m, 1H), 7.63 (td,  $J$  = 7.6 Hz, 1.6 Hz, 1H), 7.22-7.10 (m, 2H), 3.40-3.27 (m, 1H), 3.14-2.93 (m, 2H), 1.03-0.91 (m, 1H), 0.59-0.51 (m, 1H), 0.50-0.46 (m, 1H), 0.45-0.38 (m, 1H), 0.26-0.17 (m, 1H).

$^{13}\text{C}$  NMR (101 MHz,  $\text{CDCl}_3$ )  $\delta$  160.37, 148.76, 136.82, 123.92, 121.61, 75.85, 43.70, 17.33, 3.27, 2.09.

HRMS ( $m/z$ ):  $[\text{M}+\text{H}]^+$  calcd for  $\text{C}_{10}\text{H}_{14}\text{NO}$  164.1070, found 164.1068.

### 3-ethyl-1-(pyridin-2-yl)pentan-2-ol (5bs)

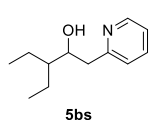

The title compound was prepared according to the general procedure as described, silica gel flash column chromatography was performed using hexanes and ethyl acetate (10:1) ( $R_f$  = 0.35 in hexane:ethyl acetate = 3:1) resulting in 11.6 mg of yellow oil in 60% yield.

$^1\text{H}$  NMR (400 MHz,  $\text{CDCl}_3$ )  $\delta$  8.53-8.44 (m, 1H), 7.62 (t,  $J$  = 7.6 Hz, 1H), 7.19-7.10 (m, 2H), 4.11-3.99 (m, 1H), 2.95-2.77 (m, 2H), 1.65-1.56 (m, 1H), 1.54-1.45 (m, 2H), 1.38-1.28 (m, 2H), 0.94 (t,  $J$  = 7.2 Hz, 6H).

$^{13}\text{C}$  NMR (101 MHz,  $\text{CDCl}_3$ )  $\delta$  161.18, 148.75, 136.82, 123.83, 121.52, 72.53, 46.77, 40.52, 22.16, 21.70, 11.91.

HRMS ( $m/z$ ):  $[\text{M}+\text{H}]^+$  calcd for  $\text{C}_{12}\text{H}_{20}\text{NO}$  194.1539, found 194.1539.

### *tert*-butyl 4-(1-hydroxy-2-(pyridin-2-yl)ethyl)piperidine-1-carboxylate (5bt)

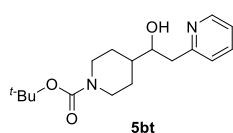

The title compound was prepared according to the general

procedure as described, silica gel flash column chromatography was performed using hexanes and ethyl acetate (10:1) ( $R_f = 0.28$  in hexane:ethyl acetate = 3:1) resulting in 10.0 mg of white oil in 33% yield.

$^1\text{H}$  NMR (600 MHz,  $\text{CDCl}_3$ )  $\delta$  8.48 (d,  $J = 4.8$  Hz, 1H), 7.62 (t,  $J = 7.8$  Hz, 1H), 7.19-7.10 (m, 2H), 4.24-4.04 (m, 2H), 3.85-3.76 (m, 1H), 2.98-2.80 (m, 2H), 2.73-2.59 (m, 2H), 1.95-1.87 (m, 2H), 1.75-1.65 (m, 2H), 1.59-1.53 (m, 1H), 1.45 (s, 9H).

$^{13}\text{C}$  NMR (151 MHz,  $\text{CDCl}_3$ )  $\delta$  160.50, 155.05, 148.72, 137.00, 123.91, 121.72, 79.40, 74.50, 42.12, 40.22, 28.64, 28.24.

HRMS ( $m/z$ ):  $[\text{M}+\text{H}]^+$  calcd for  $\text{C}_{17}\text{H}_{27}\text{N}_2\text{O}_3$  307.2016, found 307.2018.

#### (*E*)-4,8-dimethyl-1-(pyridin-2-yl)nona-3,7-dien-2-ol (**5bu**)

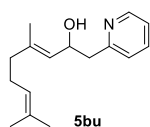

The title compound was prepared according to the general procedure as described, silica gel flash column chromatography was performed using hexanes and ethyl acetate (10:1) ( $R_f = 0.13$  in hexane:ethyl acetate = 3:1)

resulting in 8.7 mg of yellow oil in 36% yield.

$^1\text{H}$  NMR (600 MHz,  $\text{CDCl}_3$ )  $\delta$  8.51 (d,  $J = 5.4$  Hz, 1H), 7.62 (t,  $J = 7.8$  Hz, 1H), 7.18-7.11 (m, 2H), 5.29 (d,  $J = 8.4$  Hz, 1H), 5.09 (t,  $J = 7.2$  Hz, 1H), 4.87-4.79 (m, 1H), 3.02-2.86 (m, 2H), 2.13-2.05 (m, 2H), 2.01 (t,  $J = 7.2$  Hz, 2H), 1.68 (s, 3H), 1.67 (s, 3H), 1.60 (s, 3H).

$^{13}\text{C}$  NMR (151 MHz,  $\text{CDCl}_3$ )  $\delta$  160.25, 148.82, 138.24, 136.77, 131.71, 127.01, 124.22, 124.00, 121.64, 68.24, 44.15, 39.69, 26.59, 25.81, 17.83, 16.77.

HRMS ( $m/z$ ):  $[\text{M}+\text{H}]^+$  calcd for  $\text{C}_{16}\text{H}_{24}\text{NO}$  246.1852, found 246.1847.

#### 4,8-dimethyl-1-(pyridin-2-yl)non-7-en-2-ol (**5bv**)

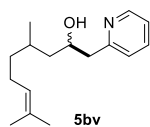

The title compound was prepared according to the general procedure as described, silica gel flash column chromatography was performed using hexanes and ethyl acetate (10:1) ( $R_f = 0.33$  in hexane:ethyl acetate = 3:1)

resulting in 6.0 mg of yellow oil in 24% yield, **5bv** was obtained as 1:1 diastereomixture. Trials to isolate each diastereomer resulted in failure.

$^1\text{H}$  NMR (600 MHz,  $\text{CDCl}_3$ )  $\delta$  8.53-8.47 (m, 1H), 7.62 (t,  $J = 7.2$  Hz, 1H), 7.18-7.10 (m, 2H), 5.14-5.07 (m, 1H), 4.19-4.09 (m, 1H), 2.94-2.74 (m, 2H), 2.06-1.91 (m, 2H), 1.68 (s, 3H), 1.60 (s, 3H), 1.52-1.40 (m, 2H), 1.38-1.30 (m, 1H), 1.24-1.11 (m, 2H), 0.94 (t,  $J = 7.2$  Hz, 3H).

$^{13}\text{C}$  NMR (151 MHz,  $\text{CDCl}_3$ )  $\delta$  160.61, 148.76, 136.82, 131.22, 125.09, 123.89, 121.61, 69.27, 44.81, 44.31, 38.08, 29.45, 25.85, 25.67, 20.33, 17.80; (other isomer) 160.61, 148.76, 136.82, 131.22, 125.05, 123.89, 121.61, 68.82, 44.72, 43.63, 37.08, 29.01, 25.85, 25.57, 19.35, 17.79.

HRMS ( $m/z$ ):  $[\text{M}+\text{H}]^+$  calcd for  $\text{C}_{16}\text{H}_{26}\text{NO}$  248.2009, found 248.2006.

### 1-((*S*)-4-(prop-1-en-2-yl)cyclohex-1-en-1-yl)-2-(pyridin-2-yl)ethan-1-ol (**5bw**)

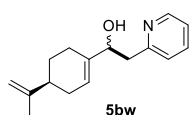

The title compound was prepared according to the general procedure as described, silica gel flash column chromatography was performed using hexanes and ethyl acetate (10:1) ( $R_f = 0.26$  in hexane:ethyl acetate = 3:1) resulting in 11.9 mg of yellow oil in 49% yield, **5bw** was obtained as 1:1 diastereomixture. Trials to isolate each diastereomer resulted in failure.

$^1\text{H}$  NMR (400 MHz,  $\text{CDCl}_3$ )  $\delta$  8.50-8.46 (m, 1H), 7.61 (td,  $J = 7.6$  Hz, 2.0 Hz, 1H), 7.17-7.11 (m, 2H), 5.78-5.72 (m, 1H), 4.84-4.62 (m, 2H), 4.51-4.22 (m, 1H), 3.04-2.86 (m, 2H), 2.37-2.25 (m, 1H), 2.24-2.04 (m, 3H), 2.01-1.93 (m, 1H), 1.90-1.81 (m, 1H), 1.73 (s, 3H), 1.57-1.42 (m, 1H).

$^{13}\text{C}$  NMR (101 MHz,  $\text{CDCl}_3$ )  $\delta$  160.48, 150.09, 148.76, 136.89, 126.54, 123.89, 122.65, 121.67, 108.71, 75.07, 42.48, 41.46, 30.63, 27.75, 25.35, 20.95; (other isomer) 160.38, 150.09, 148.75, 136.86, 126.0, 123.85, 121.87, 121.67, 108.67, 74.95, 42.45, 41.38, 30.57, 27.72, 24.71, 20.91.

HRMS ( $m/z$ ):  $[\text{M}+\text{H}]^+$  calcd for  $\text{C}_{16}\text{H}_{22}\text{NO}$  244.1696, found 244.1690.

### (*S,E*)-4-(3-(4-fluorophenyl)-1-isopropyl-1*H*-indol-2-yl)-1-(pyridin-2-yl)but-3-en-2-ol (**5bx**)

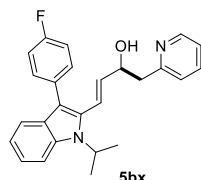

The title compound was prepared according to the general procedure



as described, silica gel flash column chromatography was performed using hexanes and ethyl acetate (10:1) ( $R_f = 0.10$  in hexane:ethyl acetate = 3:1) resulting in 17.7 mg of yellow oil in 44% yield.

$^1\text{H}$  NMR (600 MHz,  $\text{CDCl}_3$ )  $\delta$  8.54-8.46 (m, 1H), 7.61 (td,  $J = 7.8$  Hz, 1.8 Hz, 1H), 7.55-7.48 (m, 2H), 7.38-7.33 (m, 2H), 7.19-7.12 (m, 2H), 7.11-7.02 (m, 4H), 6.73 (dd,  $J = 16.2, 1.2$  Hz, 1H), 5.79 (dd,  $J = 16.2, 5.4$  Hz, 1H), 4.82-4.73 (m, 1H), 4.69-4.64 (m, 1H), 3.04-2.77 (m, 2H), 1.61 (d,  $J = 7.2$  Hz, 6H).

$^{13}\text{C}$  NMR (151 MHz,  $\text{CDCl}_3$ )  $\delta$  161.49 (d,  $J = 224.5$  Hz), 159.58, 148.59, 139.07, 137.03, 135.13, 134.09, 132.06 (d,  $J = 7.9$  Hz), 131.90 (d,  $J = 3.2$  Hz), 128.55, 124.01, 121.87, 121.71, 119.67, 119.47, 118.73, 115.31 (d,  $J = 21.1$  Hz), 114.42, 111.75, 71.56, 47.77, 42.74, 21.85, 21.82.

$^{19}\text{F}$  NMR (376 MHz,  $\text{CDCl}_3$ )  $\delta$  -117.17.

HRMS ( $m/z$ ):  $[\text{M}+\text{H}]^+$  calcd for  $\text{C}_{26}\text{H}_{26}\text{FN}_2\text{O}$  401.2024, found 401.2017.

#### **(S)-1-(9-phenyl-9H-carbazol-3-yl)-2-(pyridin-2-yl)ethan-1-ol (5by)**

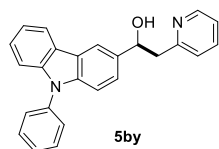

The title compound was prepared according to the general procedure as described, silica gel flash column chromatography was performed using hexanes and ethyl acetate (10:1) ( $R_f = 0.11$  in hexane:ethyl

acetate = 3:1) resulting in 16.0 mg of yellow oil in 44% yield.

$^1\text{H}$  NMR (600 MHz,  $\text{CDCl}_3$ )  $\delta$  8.58 (d,  $J = 4.8$  Hz, 1H), 8.23 (s, 1H), 8.14 (d,  $J = 7.8$  Hz, 1H), 7.65-7.59 (m, 3H), 7.57 (d,  $J = 7.2$  Hz, 2H), 7.49-7.43 (m, 2H), 7.42-7.36 (m, 3H), 7.30-7.26 (m, 1H), 7.22-7.17 (m, 1H), 7.15 (d,  $J = 7.8$  Hz, 1H), 5.43-5.32 (m, 1H), 3.33-3.15 (m, 2H).

$^{13}\text{C}$  NMR (151 MHz,  $\text{CDCl}_3$ )  $\delta$  160.11, 148.77, 141.37, 140.54, 137.95, 136.99, 136.11, 129.99, 127.52, 127.20, 126.02, 124.26, 124.02, 123.58, 123.49, 121.84, 120.50, 120.02, 117.81, 109.91, 109.73, 73.97, 46.55.

HRMS ( $m/z$ ):  $[\text{M}+\text{H}]^+$  calcd for  $\text{C}_{25}\text{H}_{21}\text{N}_2\text{O}$  365.1648, found 365.1640.

#### **2-((1S,5R)-6,6-dimethylbicyclo[3.1.1]hept-2-en-2-yl)ethyl-4-((S)-1-hydroxy-2-(pyr**



Hz, 3.6 Hz, 1H), 3.60-2.98 (m, 2H).

$^{13}\text{C}$  NMR (151 MHz,  $\text{CDCl}_3$ )  $\delta$  160.71, 147.23, 144.14, 136.96, 129.97, 128.90, 128.51, 127.74, 127.45, 127.03, 126.38, 126.04, 122.24, 73.12, 46.29.

### 2-(5-ethylpyridin-2-yl)-1-phenylethan-1-ol (5ha)

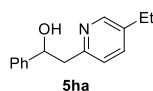

The title compound was prepared according to the general procedure as described, silica gel flash column chromatography was performed using hexanes and ethyl acetate (10:1) ( $R_f$  = 0.23 in hexane:ethyl acetate = 3:1) resulting in 12.3 mg of yellow oil in 54% yield.

$^1\text{H}$  NMR (600 MHz,  $\text{CDCl}_3$ )  $\delta$  8.39-8.37 (m, 1H), 7.45 (dd,  $J$  = 8.4 Hz, 2.4 Hz, 1H), 7.43 (d,  $J$  = 7.2 Hz, 2H), 7.34 (t,  $J$  = 7.2 Hz, 2H), 7.27-7.23 (m, 1H), 7.03 (d,  $J$  = 7.8 Hz, 1H), 5.14 (dd,  $J$  = 7.8 Hz, 3.6 Hz, 1H), 3.20-3.02 (m, 2H), 2.64 (q,  $J$  = 7.8 Hz, 2H), 1.25 (t,  $J$  = 7.2 Hz, 3H).

$^{13}\text{C}$  NMR (151 MHz,  $\text{CDCl}_3$ )  $\delta$  157.18, 148.31, 144.35, 137.42, 136.46, 128.44, 127.38, 126.01, 123.50, 73.62, 45.37, 25.88, 15.44.

HRMS ( $m/z$ ):  $[\text{M}+\text{H}]^+$  calcd for  $\text{C}_{15}\text{H}_{17}\text{NO}$  228.1383, found 228.1376

### 2-(4,6-dimethylpyridin-2-yl)-1-phenylethan-1-ol (5ia)

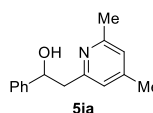

The title compound was prepared according to the general procedure as described, silica gel flash column chromatography was performed using hexanes and ethyl acetate (10:1) ( $R_f$  = 0.27 in hexane:ethyl acetate = 3:1) resulting in 17.3 mg of yellow oil in 76% yield.

$^1\text{H}$  NMR (600 MHz,  $\text{CDCl}_3$ )  $\delta$  7.43 (d,  $J$  = 7.2 Hz, 2H), 7.35 (t,  $J$  = 7.8 Hz, 2H), 7.27-7.24 (m, 1H), 6.87 (s, 1H), 6.74 (s, 1H), 5.10 (dd,  $J$  = 9.0 Hz, 3.0 Hz, 1H), 3.07-2.96 (m, 2H), 2.51 (s, 3H), 2.27 (s, 3H).

$^{13}\text{C}$  NMR (151 MHz,  $\text{CDCl}_3$ )  $\delta$  159.11, 157.24, 148.47, 144.52, 128.42, 127.30, 126.00, 122.38, 121.71, 73.57, 45.39, 24.28, 21.04.

HRMS ( $m/z$ ):  $[\text{M}+\text{H}]^+$  calcd for  $\text{C}_{15}\text{H}_{17}\text{NO}$  228.1383, found 228.1375

### 1-phenyl-2-(pyridin-4-yl)ethan-1-ol (5ja)<sup>10</sup>

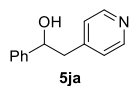

The title compound was prepared according to the general procedure as described, silica gel flash column chromatography was performed using hexanes and ethyl acetate (10:1) ( $R_f = 0.28$  in hexane:ethyl acetate = 3:1) resulting in 5.0 mg of yellow oil in 25% yield.

$^1\text{H}$  NMR (600 MHz,  $\text{CDCl}_3$ )  $\delta$  8.46 (d,  $J = 4.8$  Hz, 2H), 7.37-7.27 (m, 5H), 7.10 (d,  $J = 4.8$  Hz, 2H), 4.94 (dd,  $J = 8.4$  Hz, 5.4 Hz, 1H), 3.09-2.96 (m, 2H).

$^{13}\text{C}$  NMR (151 MHz,  $\text{CDCl}_3$ )  $\delta$  149.68, 147.52, 143.66, 128.71, 128.08, 126.00, 125.07, 74.67, 45.25.

## VII. References

1. Niwa, T.; Yorimitsu H.; Oshima, K. *Angew. Chem. Int. Ed.*, **2007**, *46*, 2643-2645.
2. Xu, X.; Min, Q.-Q.; Li, N. Liu, F. *Chem. Commun.*, **2018**, *54*, 11017-11020.
3. Liu, X.; Liu, L.; Huang, T.; Zhang, J.; Tang, Z.; Li, C.; Chen, T. *Org. Lett.*, **2021**, *23*, 4930-4934.
4. Wang, X.; Liu, F.; Yan, Z.; Qiang, Q.; Huang, W.; Rong, Z.-Q. *ACS Catal.*, **2021**, *11*, 7319-7326.
5. Graves, V. B.; Shaikh, A. *Tetrahedron Lett.*, **2013**, *54*, 695-698.
6. Jamal, Z.; Teo, Y.-C. *RSC Adv.*, **2015**, *5*, 26949-26953.
7. Mao, D.; Hong, G.; Wu, S.; Liu, X.; Yu, J.; Wang, L. *Eur. J. Org. Chem.*, **2014**, *2014*, 3009-3019.
8. Rendler, S.; Plefka, O.; Karatas, B.; Auer, G.; Fröhlich, R.; Mück-Lichtenfeld, C.; Grimme, S.; Oestreich, M. *Chem. - Eur. J.*, **2008**, *14*, 11512-11528.
9. Nageswara Rao, N.; Meshram, H. M. *Tetrahedron Lett.*, **2013**, *54*, 5087-5090.
10. Barrios-Rivera, J.; Xu, Y.; Clarkson, G. J.; Wills, M. *Tetrahedron*, **2022**, *103*, 132562.

## VIII. NMR spectra of the products

### <sup>1</sup>H NMR (CDCl<sub>3</sub>) for **3ba**

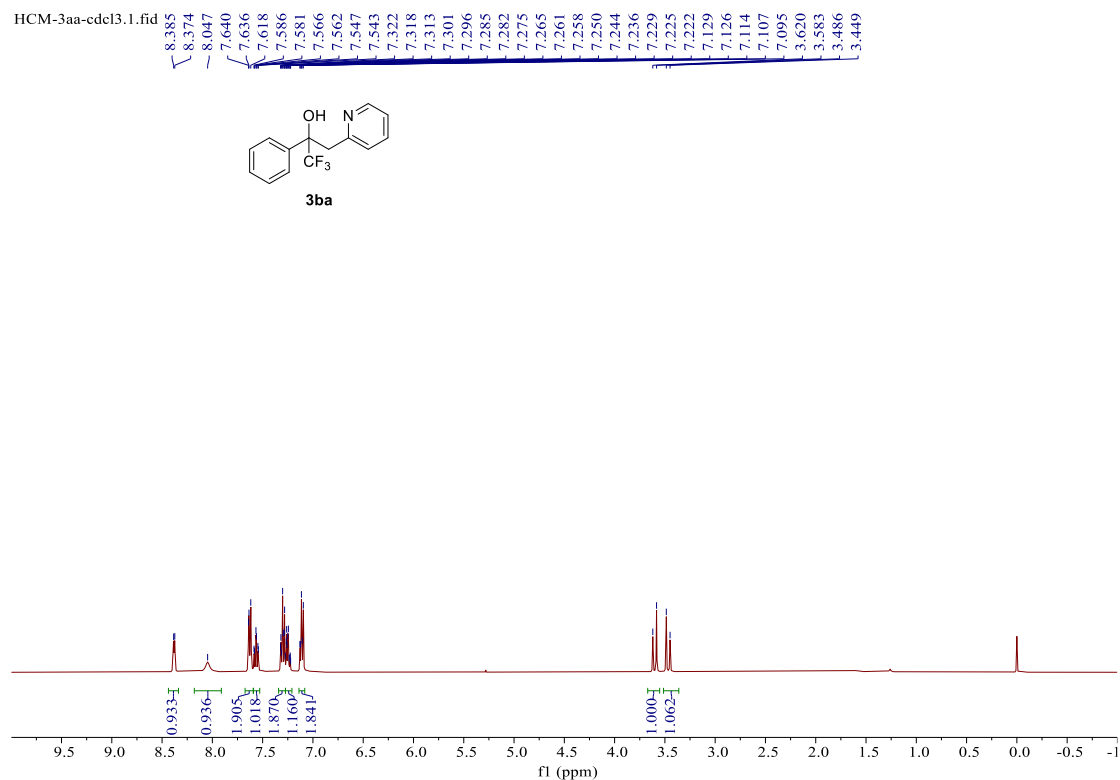

### <sup>13</sup>C NMR (CDCl<sub>3</sub>) for **3ba**

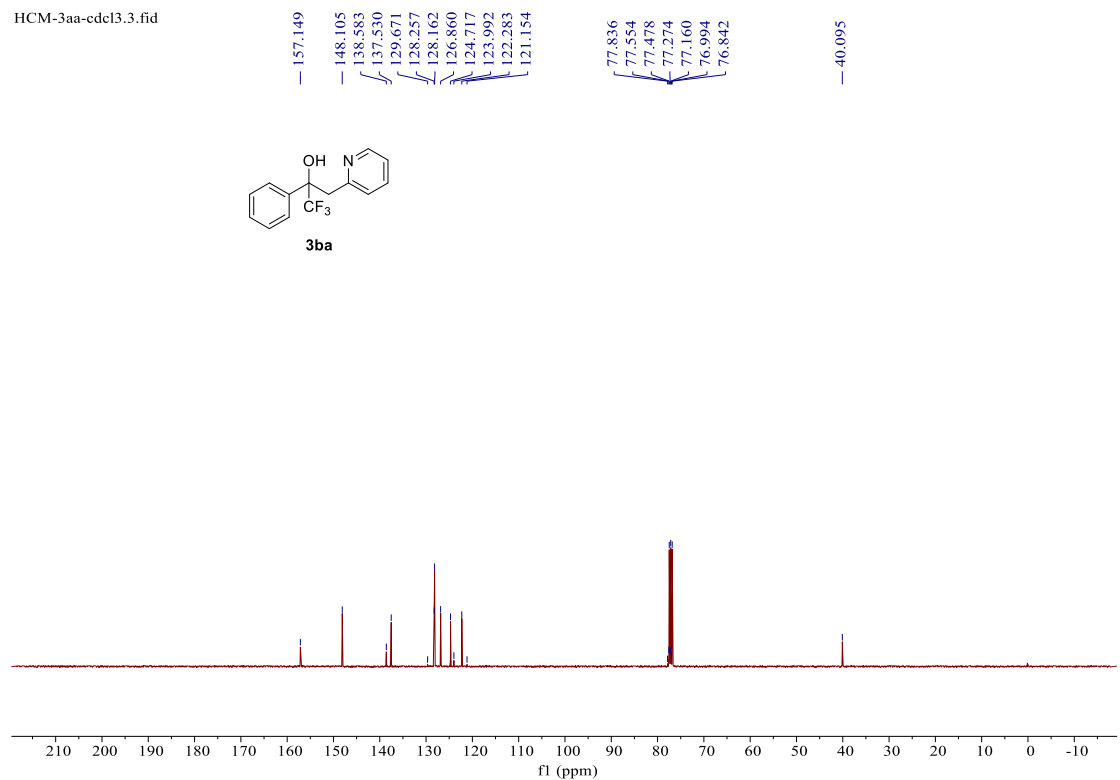

<sup>19</sup>F NMR (CDCl<sub>3</sub>) for **3ba**

HCM-3aa-edel3.2.fid

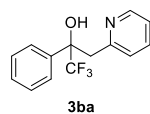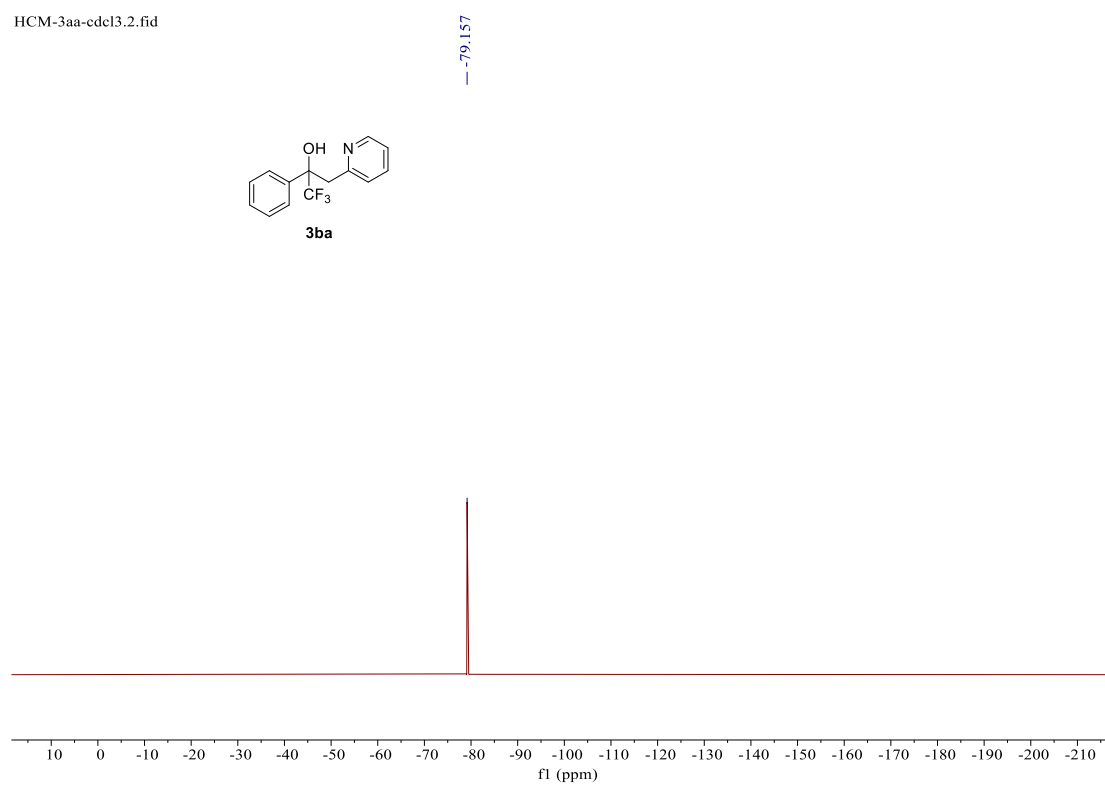

<sup>1</sup>H NMR (CDCl<sub>3</sub>) for **3bb**

HCM-1H.20.fid  
HCM-316a

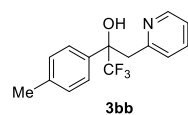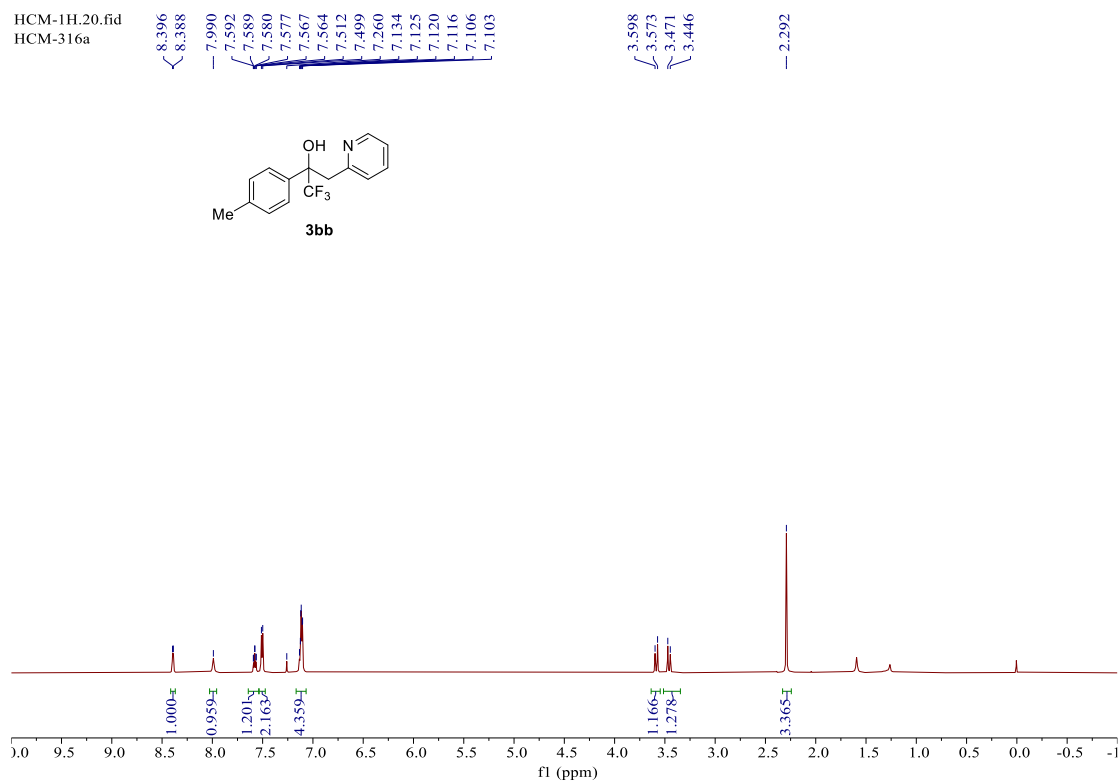

<sup>13</sup>C NMR (CDCl<sub>3</sub>) for **3bb**

HCM-13C.62.fid  
HCM-316a

157.303  
148.115  
137.979  
137.494  
135.617  
128.908  
128.306  
126.773  
126.414  
124.734  
124.521  
122.629  
122.235  
77.622  
77.435  
77.372  
77.247  
77.161  
77.060  
76.949  
40.100  
21.120

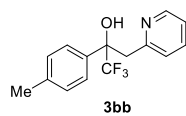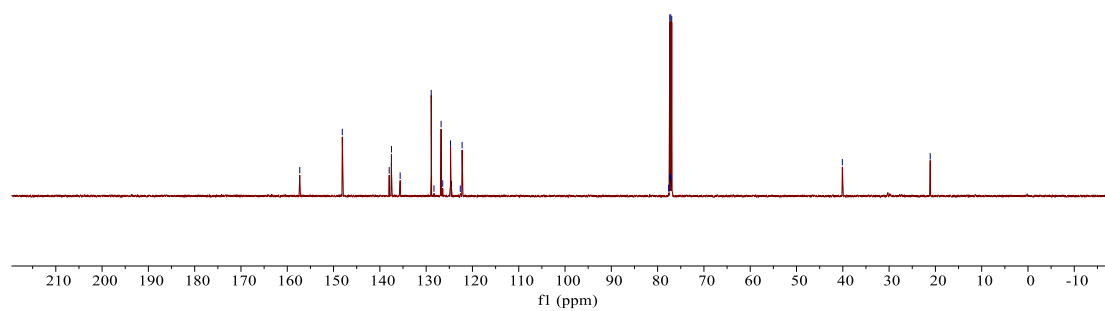

<sup>19</sup>F NMR (CDCl<sub>3</sub>) for **3bb**

316a.1.fid

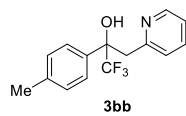

-79.365

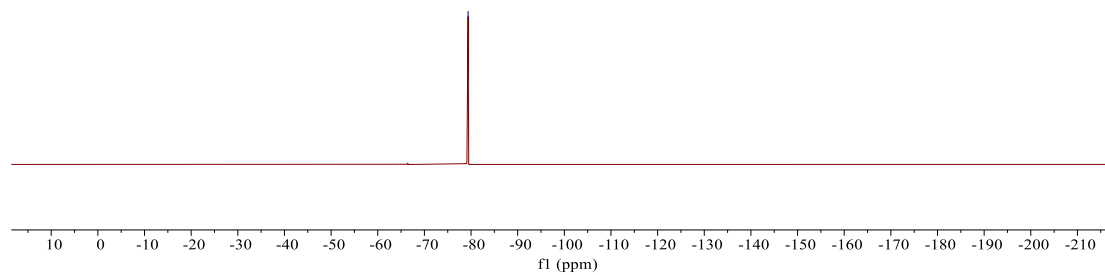



<sup>1</sup>H NMR (CDCl<sub>3</sub>) for **3bc**

HCM-1H.22.fid  
HCM-316c

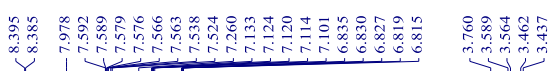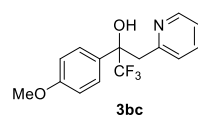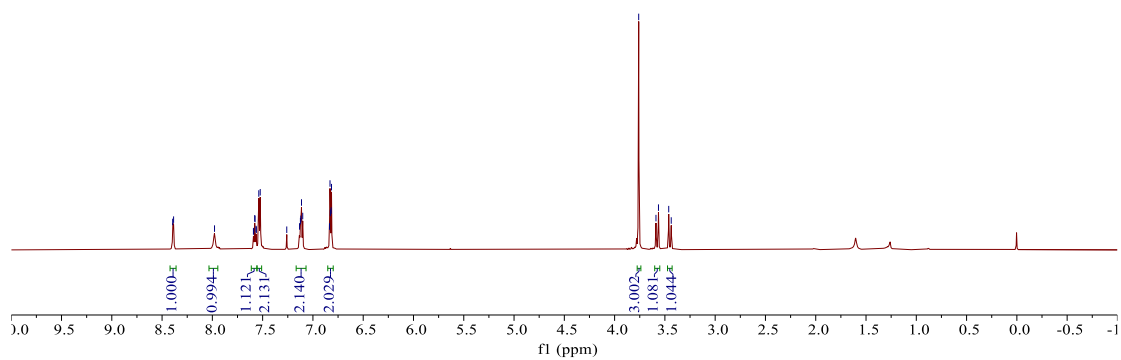

<sup>13</sup>C NMR (CDCl<sub>3</sub>) for **3bc**

HCM-13C.64.fid  
HCM-316c

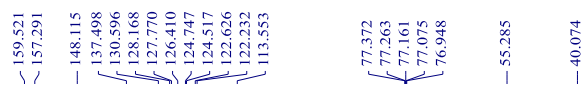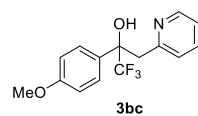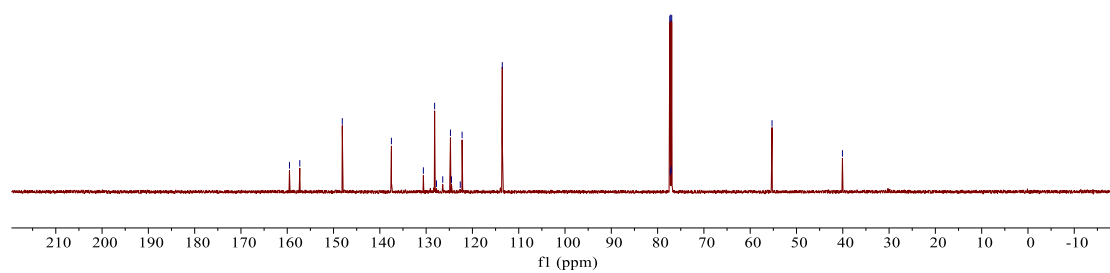

<sup>19</sup>F NMR (CDCl<sub>3</sub>) for **3bc**

316c.1.fid

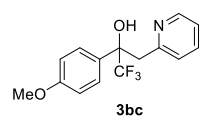

-79.629

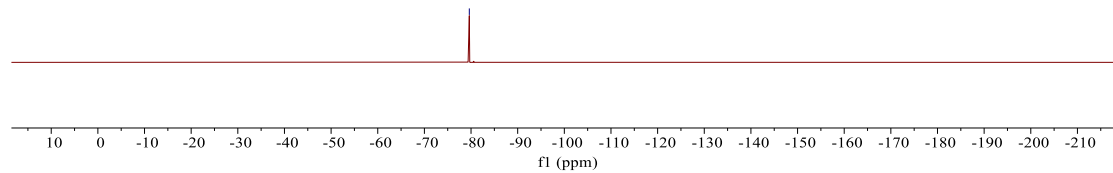

<sup>1</sup>H NMR (CDCl<sub>3</sub>) for **3bd**

HCM-1H.27.fid  
HCM-340

8.396  
8.388  
8.119  
7.607  
7.599  
7.594  
7.590  
7.585  
7.580  
7.578  
7.260  
7.152  
7.144  
7.139  
7.131  
7.113  
7.100  
6.993  
6.978  
6.964  
3.606  
3.581  
3.451  
3.426

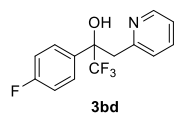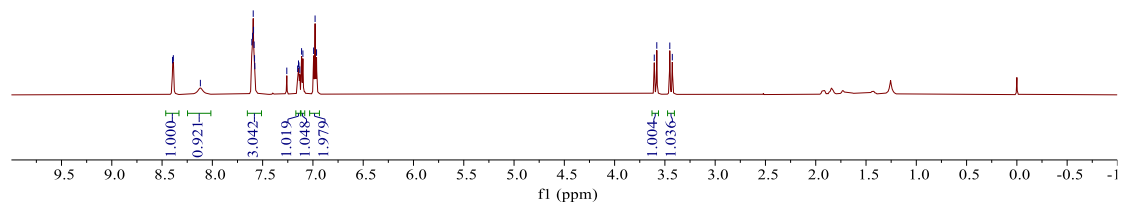

<sup>13</sup>C NMR (CDCl<sub>3</sub>) for **3bd**

340.2.fid

163.947  
161.492  
156.913  
148.123  
137.653  
134.386  
134.354  
129.588  
128.846  
128.764  
126.656  
124.718  
123.821  
122.407  
120.975  
115.187  
114.973  
77.590  
77.477  
77.308  
77.160  
77.025  
76.842  
39.988

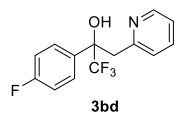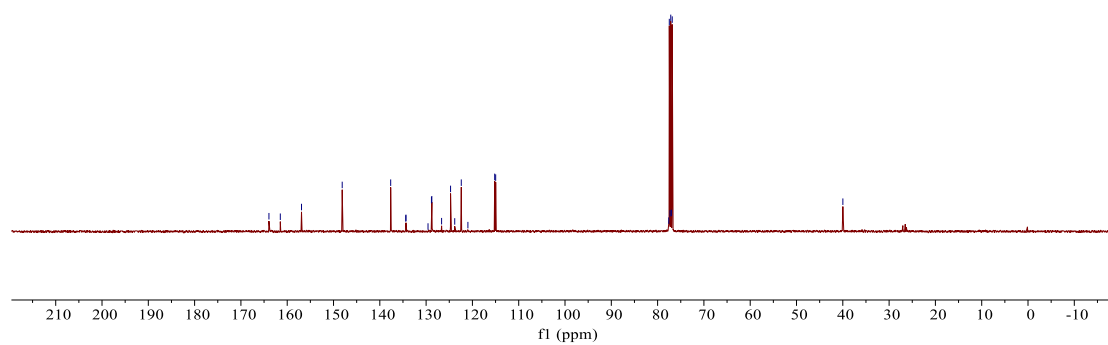

<sup>19</sup>F NMR (CDCl<sub>3</sub>) for **3bd**

340.1.fid

-79.521  
-114.436

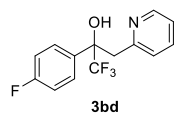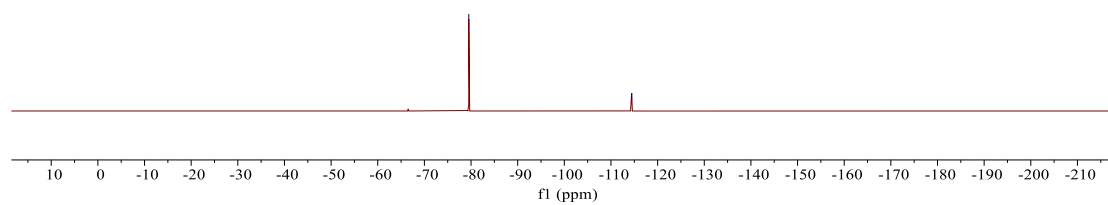

<sup>1</sup>H NMR (CDCl<sub>3</sub>) for **3be**

HCM-1H.21.fid  
HCM-316b

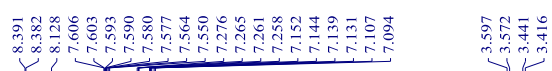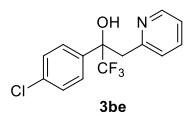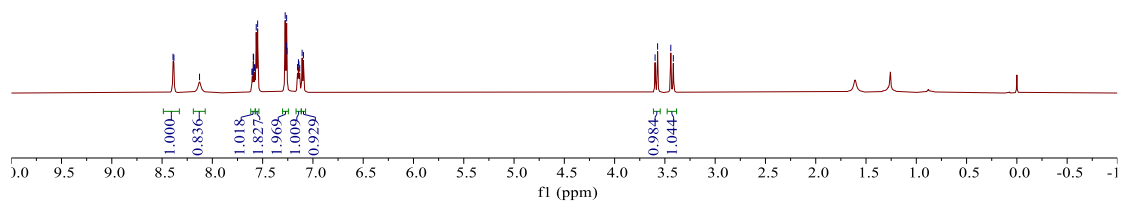

<sup>13</sup>C NMR (DMSO-*d*<sub>6</sub>) for **3be**

316b.3.fid

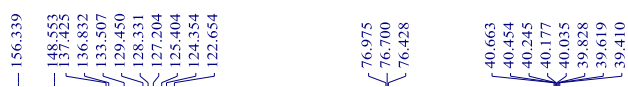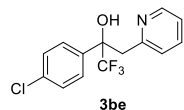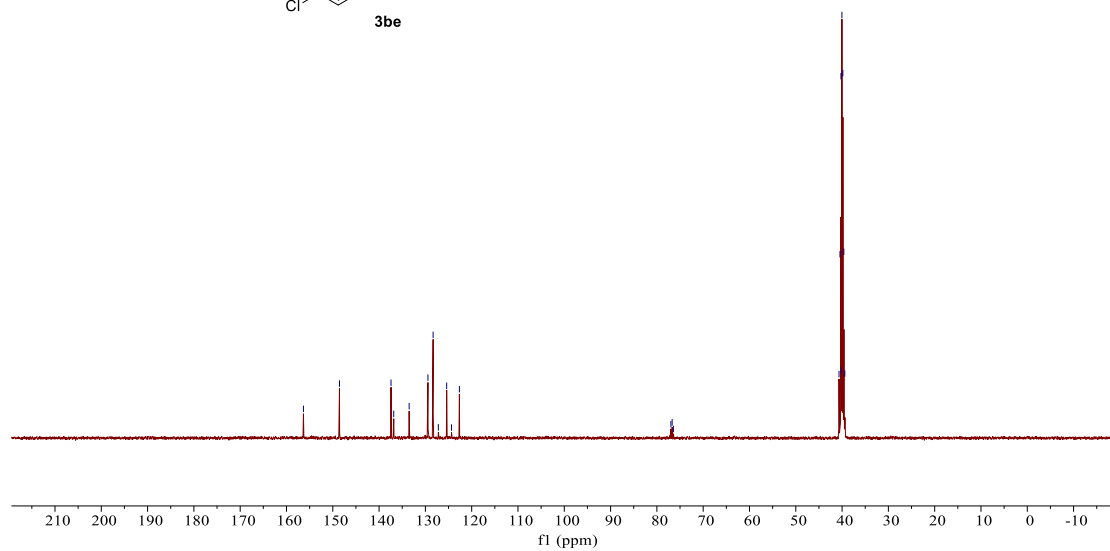

<sup>19</sup>F NMR (CDCl<sub>3</sub>) for **3be**

316b.1.fid

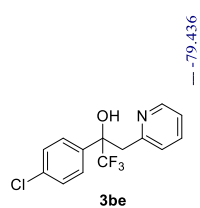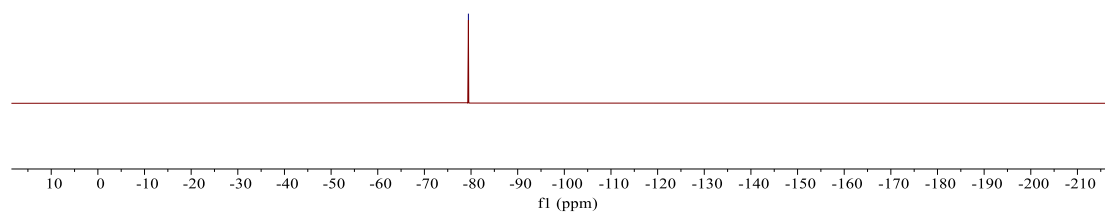

<sup>1</sup>H NMR (CDCl<sub>3</sub>) for **3bf**

HCM-316  
8.336  
8.334  
8.332  
8.331  
8.386  
8.384  
8.381  
8.379  
7.618  
7.613  
7.599  
7.594  
7.579  
7.575  
7.509  
7.492  
7.488  
7.442  
7.436  
7.431  
7.419  
7.414  
7.260  
7.164  
7.161  
7.151  
7.148  
7.144  
7.141  
7.132  
7.129  
7.113  
7.093  
3.602  
3.565  
3.443  
3.406

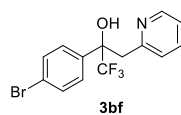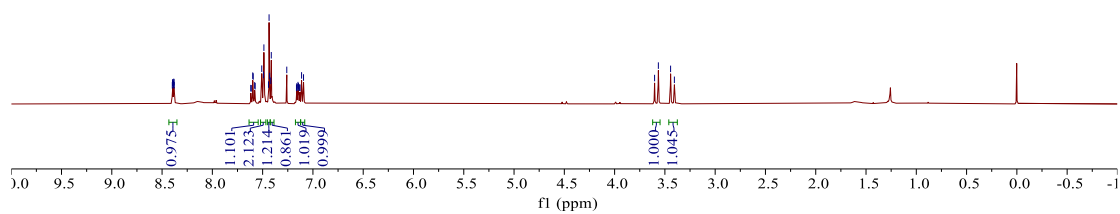

<sup>13</sup>C NMR (CDCl<sub>3</sub>) for **3bf**

HCM-354.2.fid

156.767  
148.159  
137.747  
137.704  
131.375  
129.331  
128.769  
126.493  
124.707  
123.653  
122.690  
122.470

77.697  
77.478  
77.416  
77.161  
76.843

39.748

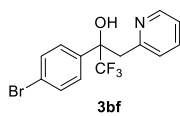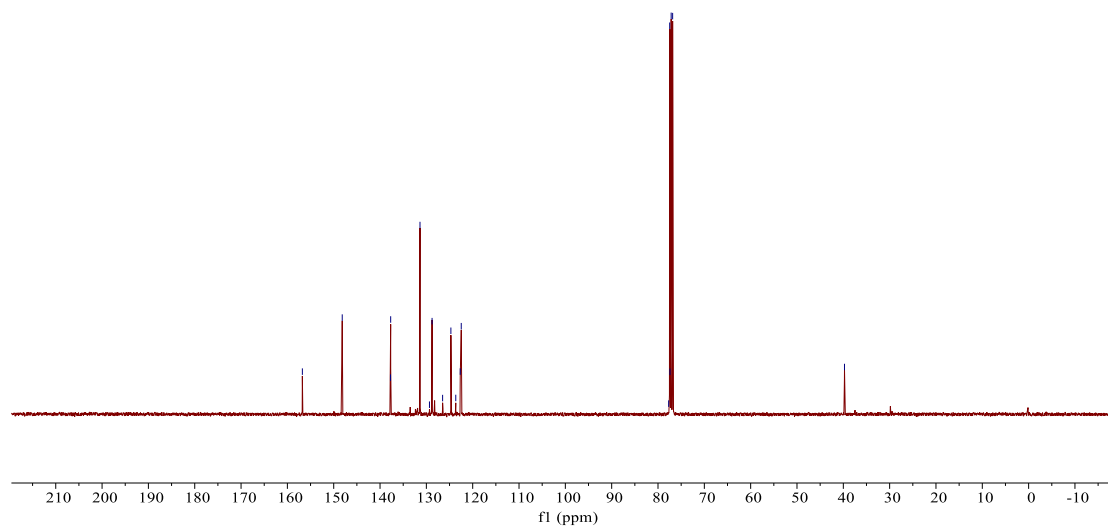

<sup>19</sup>F NMR (CDCl<sub>3</sub>) for **3bf**

HCM-354.3.fid

-79.394

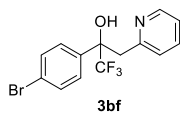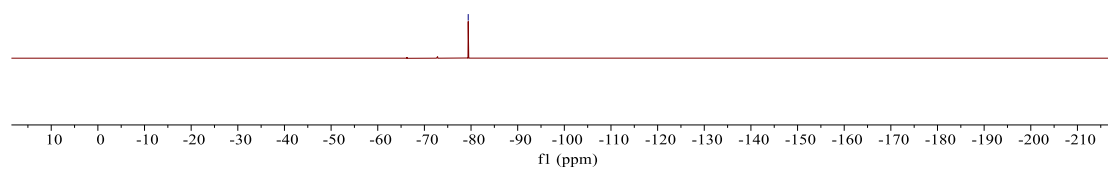

<sup>1</sup>H NMR (CDCl<sub>3</sub>) for **3bg**

HCM-459b.1.fid

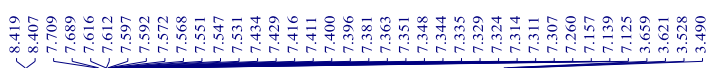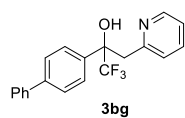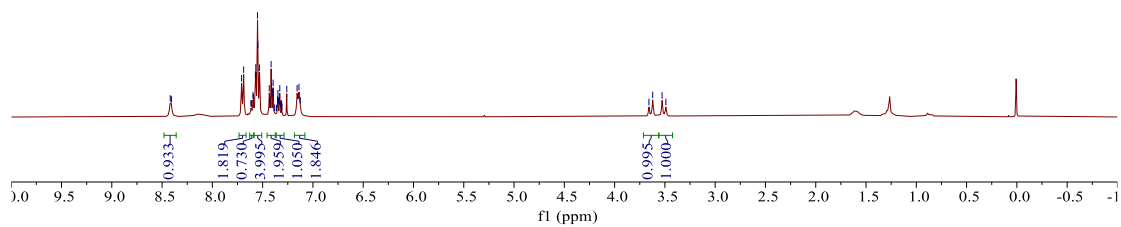

<sup>13</sup>C NMR (DMSO-*d*<sub>6</sub>) for **3bg**

HCM-459b.4.fid

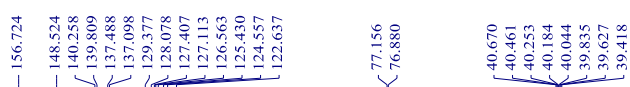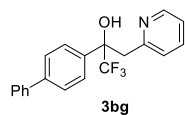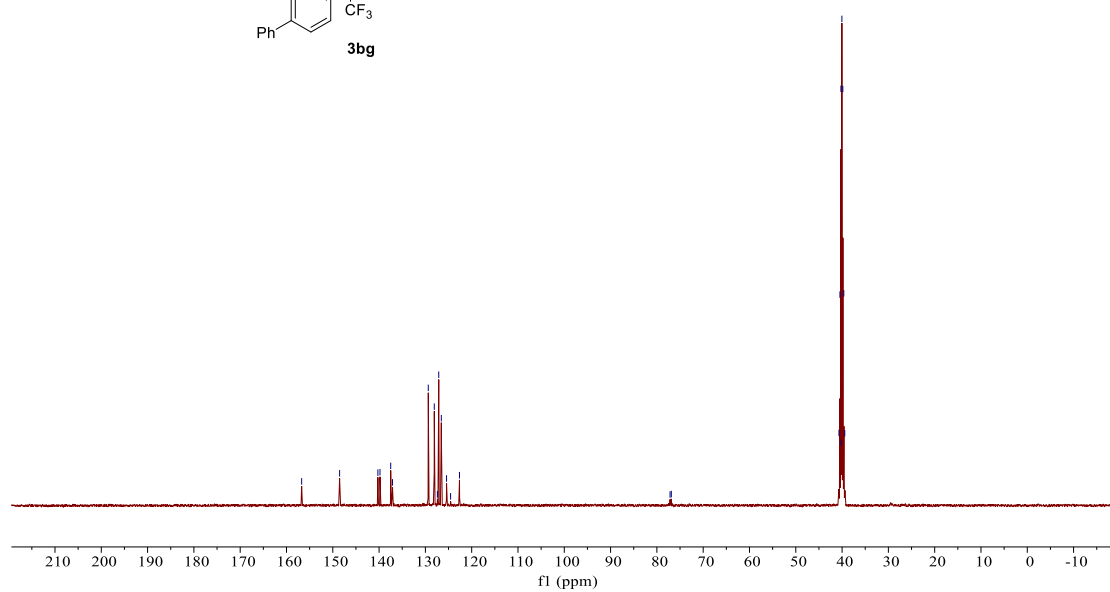

<sup>19</sup>F NMR (CDCl<sub>3</sub>) for **3bg**

HCM-459b.3.fid

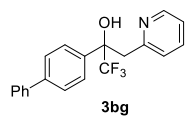

-79.093

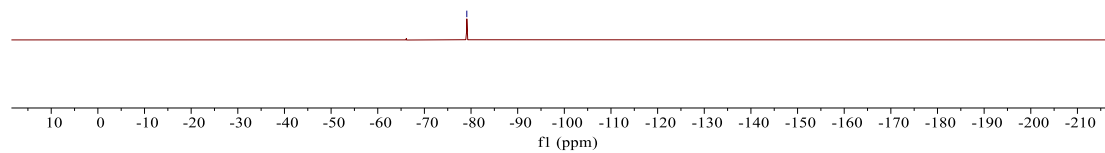

<sup>1</sup>H NMR (CDCl<sub>3</sub>) for **3bh**

358b.1.fid

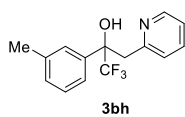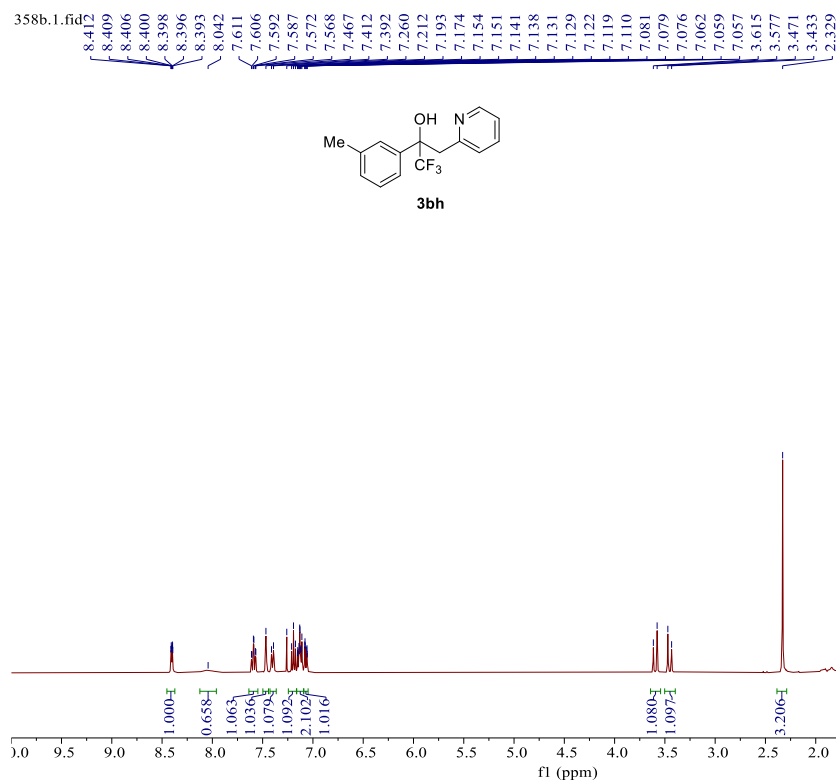



<sup>13</sup>C NMR (CDCl<sub>3</sub>) for **3bh**

358b.3.fid

157.212  
148.041  
138.509  
137.778  
137.566  
129.728  
129.028  
128.011  
127.548  
126.887  
124.722  
124.046  
123.823  
122.277  
77.789  
77.478  
77.229  
77.160  
76.946  
76.842  
40.194  
21.666

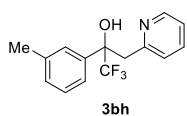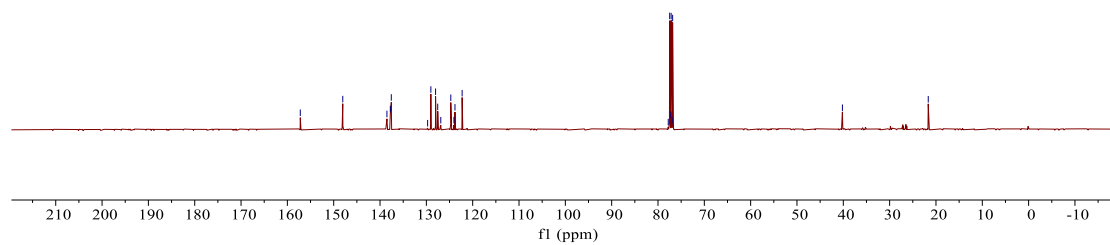

<sup>19</sup>F NMR (CDCl<sub>3</sub>) for **3bh**

358b.2.fid

-78.981

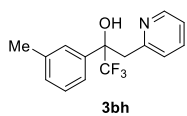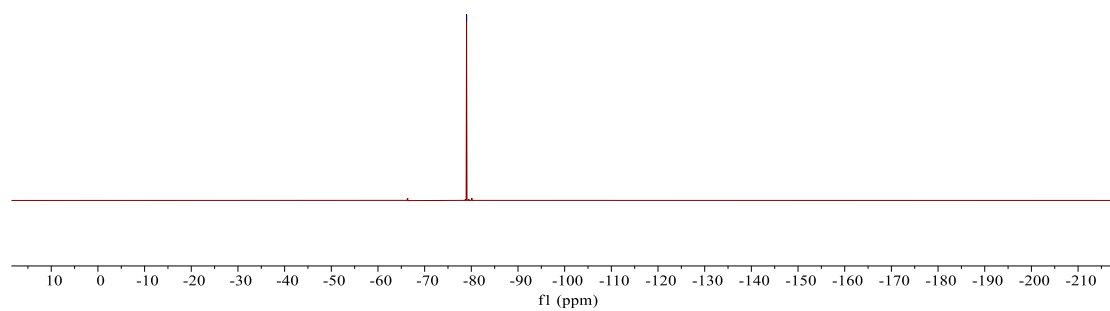

<sup>1</sup>H NMR (CDCl<sub>3</sub>) for **3bi**

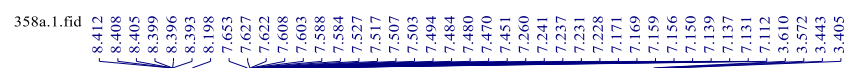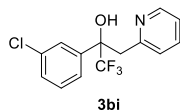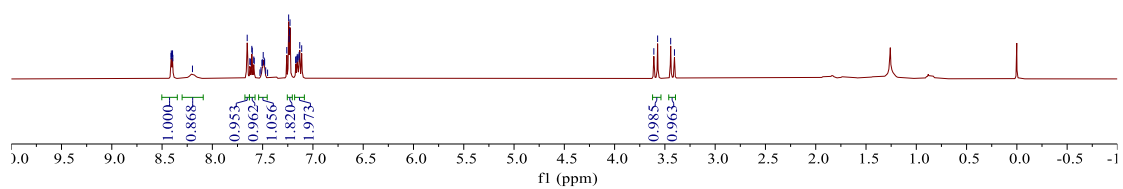

<sup>13</sup>C NMR (CDCl<sub>3</sub>) for **3bi**

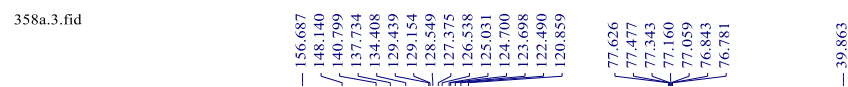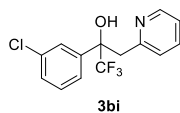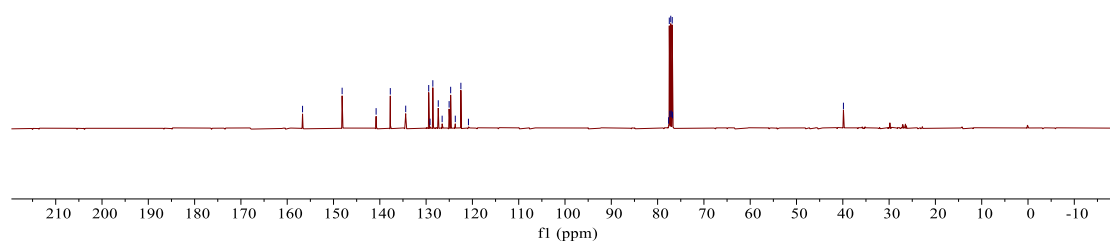

<sup>19</sup>F NMR (CDCl<sub>3</sub>) for **3bi**

358a.2.fid

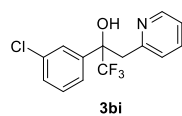

-79.153

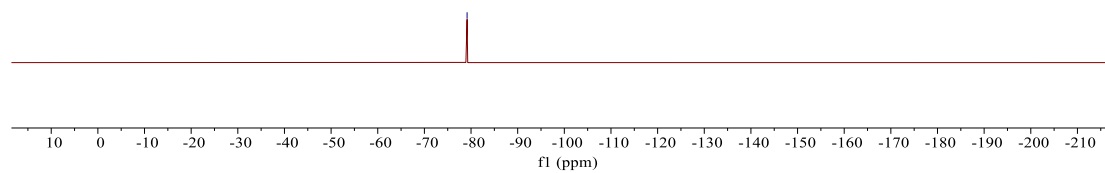

<sup>1</sup>H NMR (CDCl<sub>3</sub>) for **3bj**

8.433  
8.414  
8.414  
8.409  
8.407  
8.404  
8.402  
8.296  
8.292  
7.645  
7.626  
7.621  
7.607  
7.602  
7.260  
7.193  
7.190  
7.178  
7.174  
7.171  
7.162  
7.158  
7.152  
7.133  
7.114  
6.729  
6.724  
6.718  
6.708  
6.702  
6.696  
6.686  
6.680  
6.674  
3.593  
3.556  
3.394  
3.356

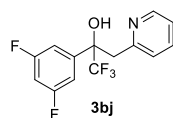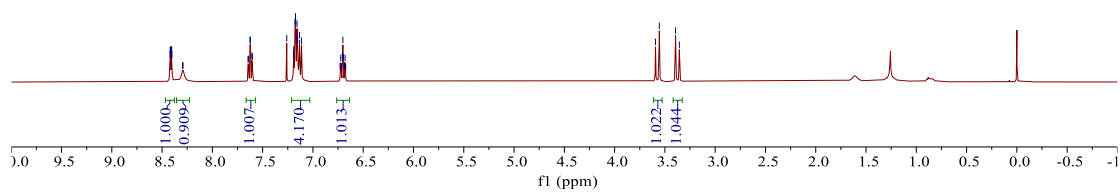

<sup>13</sup>C NMR (CDCl<sub>3</sub>) for **3bj**

355a.3.fid

164.236  
164.112  
161.771  
161.645  
156.380  
148.187  
143.025  
142.940  
142.855  
137.849  
129.139  
126.302  
124.685  
123.463  
122.633  
110.438  
110.363  
110.244  
110.171  
104.130  
103.878  
103.626  
77.478  
77.369  
77.160  
77.087  
76.841

— 39.767

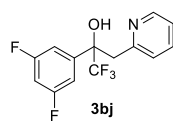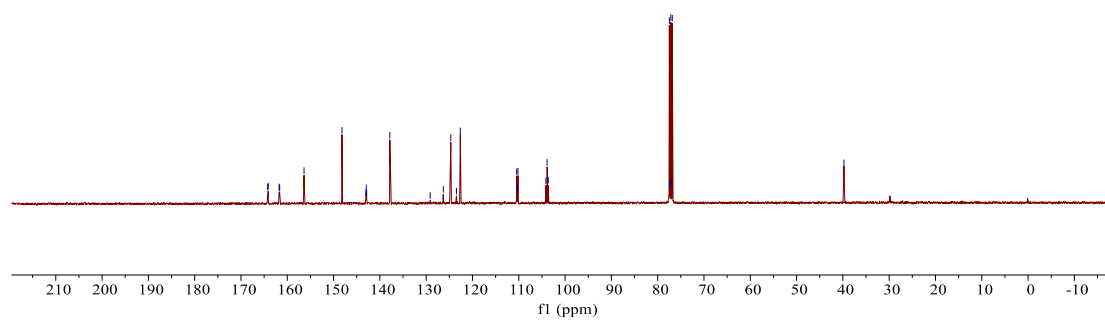

<sup>19</sup>F NMR (CDCl<sub>3</sub>) for **3bj**

355a.2.fid

— -79.204

— -109.495

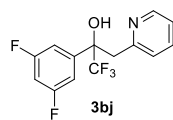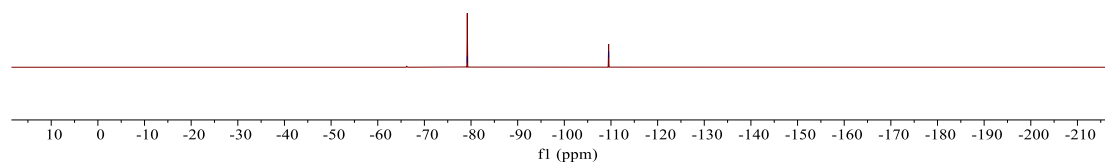

<sup>1</sup>H NMR (CDCl<sub>3</sub>) for **3bk**

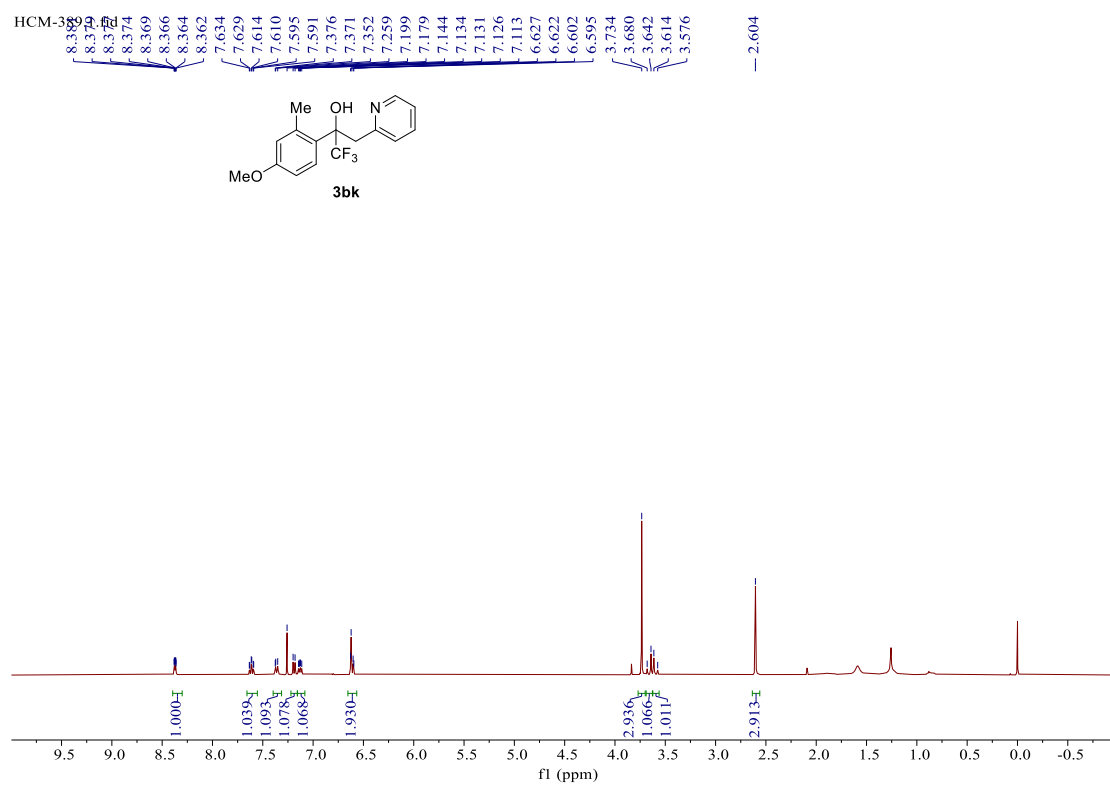

<sup>13</sup>C NMR (CDCl<sub>3</sub>) for **3bk**

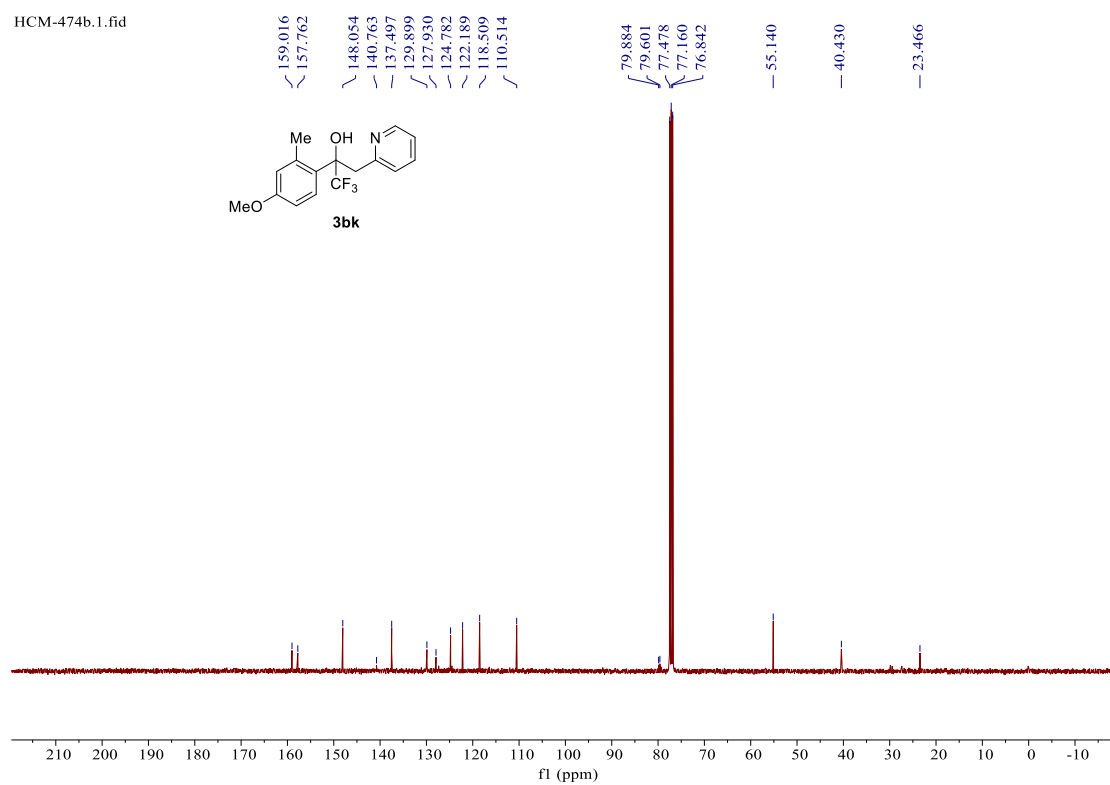



<sup>13</sup>C NMR (CDCl<sub>3</sub>) for **3bl**

HCM-443e.3.fid

157.018  
148.047  
137.620  
135.969  
133.094  
133.044  
128.609  
127.839  
127.558  
126.851  
126.520  
126.227  
124.744  
124.259  
124.056  
122.330  
121.216  
78.052  
77.771  
77.478  
77.160  
76.843  
40.036

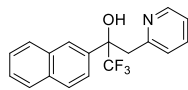

**3bl**

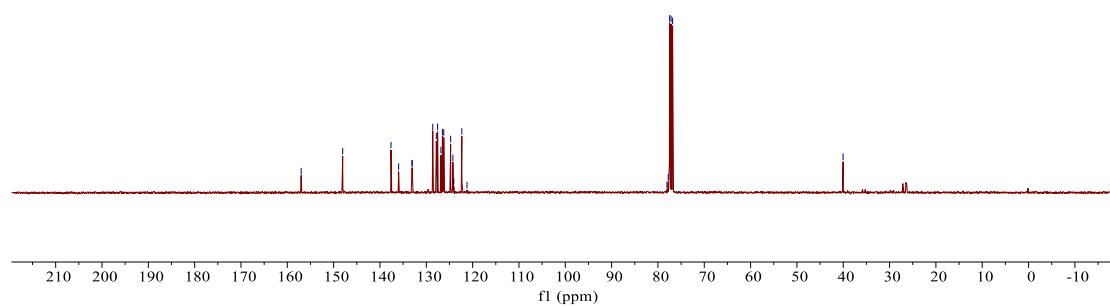

<sup>19</sup>F NMR (CDCl<sub>3</sub>) for **3bl**

HCM-443e.2.fid

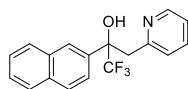

**3bl**

-78.964

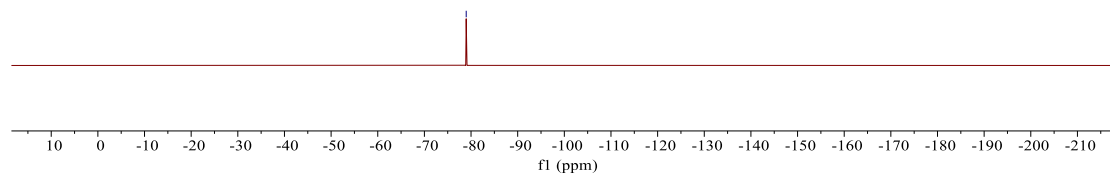

<sup>1</sup>H NMR (CDCl<sub>3</sub>) for **3bm**

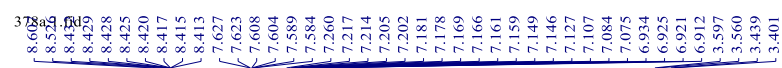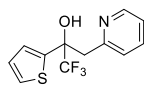

**3bm**

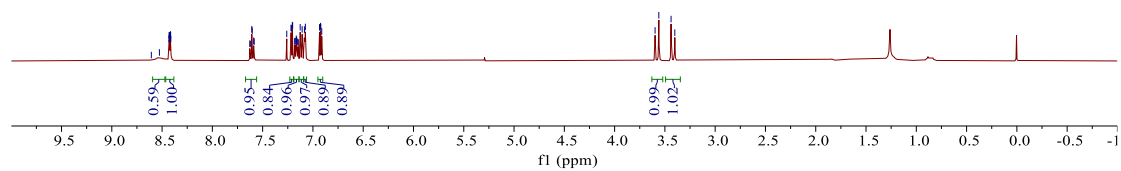

<sup>13</sup>C NMR (DMSO-*d*<sub>6</sub>) for **3bm**

hem-378a.3.fid

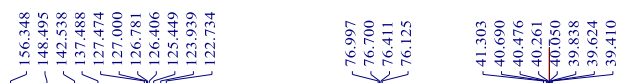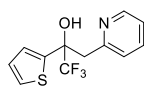

**3bm**

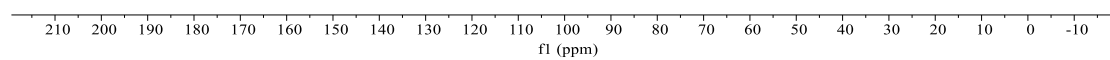



<sup>19</sup>F NMR (CDCl<sub>3</sub>) for **3bm**

378a.2.fid

-80.579

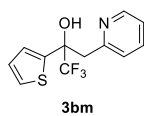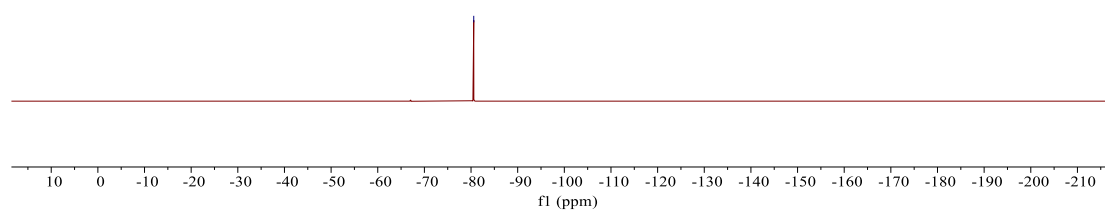

<sup>1</sup>H NMR (CDCl<sub>3</sub>) for **3bn**

HCM-1H.38.fid

HCM-393d

8.741  
8.411  
8.409  
8.401  
7.752  
7.739  
7.692  
7.679  
7.587  
7.584  
7.574  
7.571  
7.561  
7.558  
7.345  
7.307  
7.295  
7.284  
7.280  
7.276  
7.265  
7.253  
7.248  
7.155  
7.142  
7.135  
7.131  
7.122  
3.644  
3.619  
3.499  
3.474

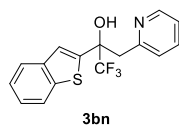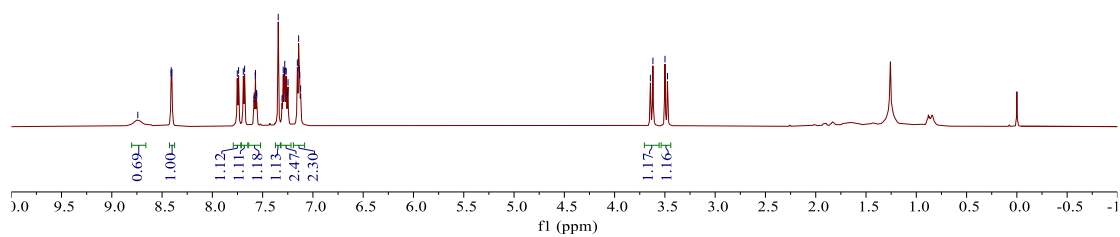

<sup>13</sup>C NMR (CDCl<sub>3</sub>) for **3bn**

hem-393d.2.fid

156.553  
148.008  
144.110  
140.084  
139.716  
137.787  
128.974  
126.136  
124.865  
124.476  
124.305  
123.855  
123.300  
122.663  
122.546  
122.258  
120.461  
77.605  
77.477  
77.309  
77.160  
77.012  
76.842  
40.501

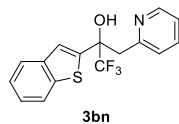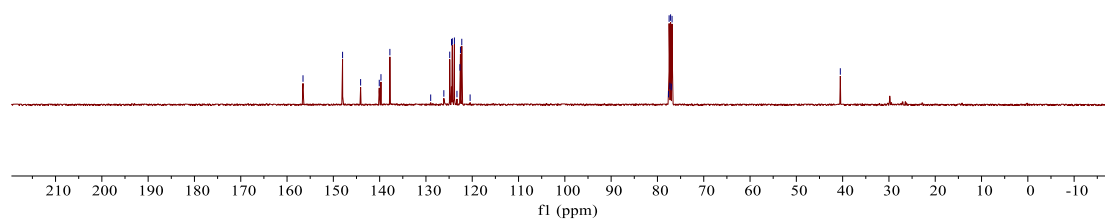

<sup>19</sup>F NMR (CDCl<sub>3</sub>) for **3bn**

hem-393d.1.fid

-80.129

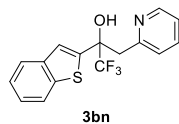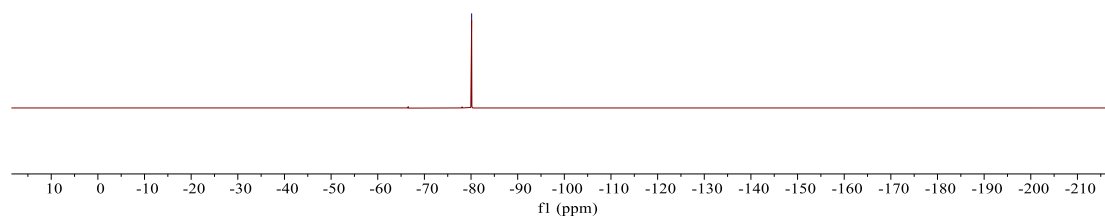



<sup>19</sup>F NMR (CDCl<sub>3</sub>) for **3bo**

HCM-399a.2.fid

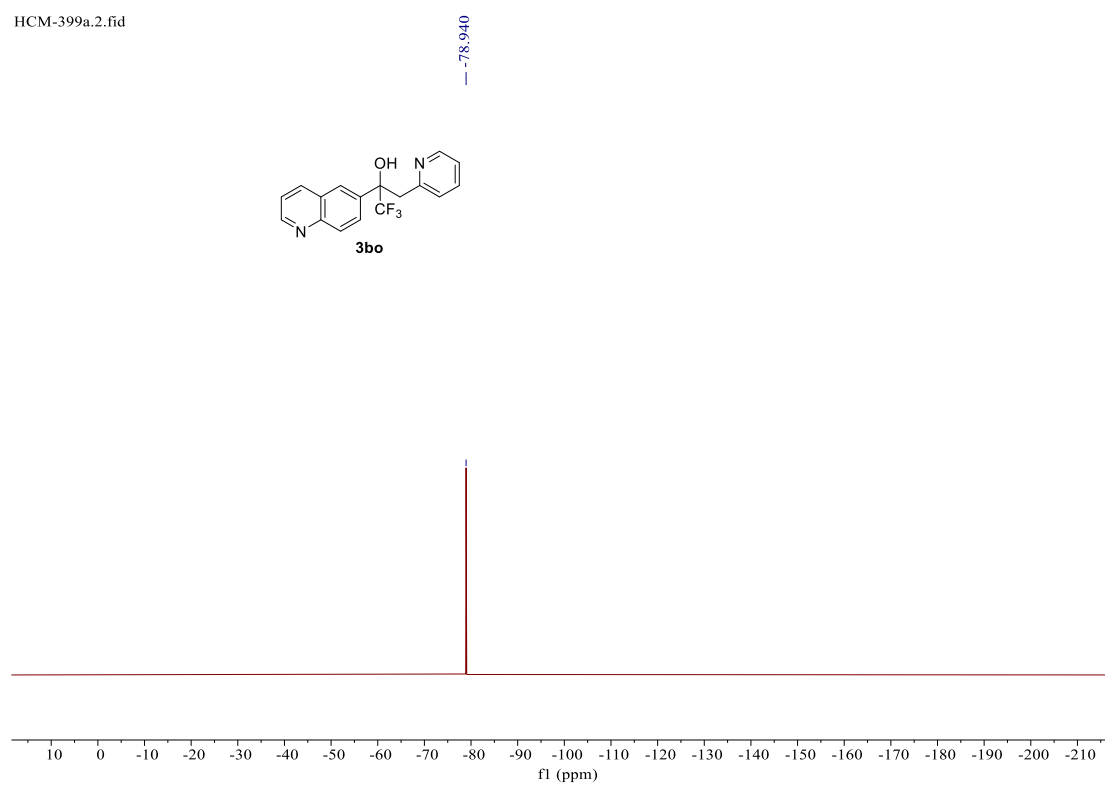

<sup>1</sup>H NMR (CDCl<sub>3</sub>) for **3bp**

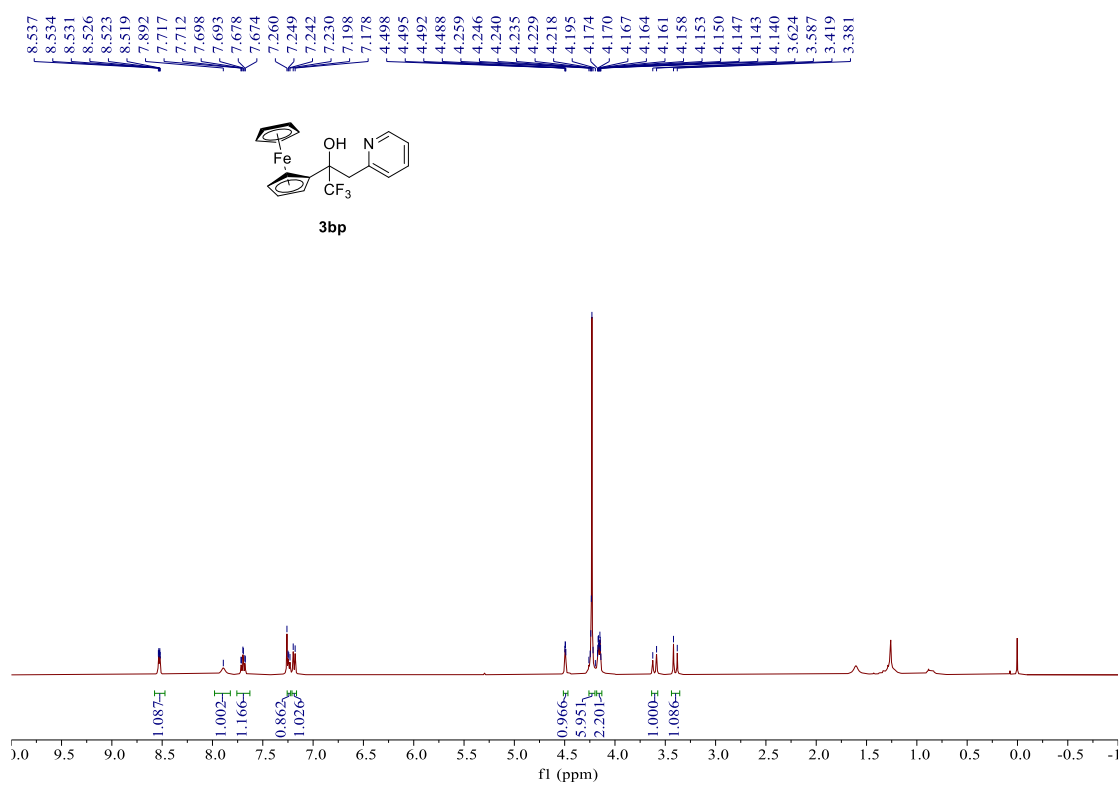

<sup>13</sup>C NMR (CDCl<sub>3</sub>) for **3bp**

HCM-459a.2.fid

— 157.895  
— 148.178  
— 137.643  
— 127.036  
— 124.380  
— 124.167  
— 122.290  
  
— 90.234  
— 77.477  
— 77.160  
— 76.843  
— 75.513  
— 75.237  
— 69.187  
— 68.134  
— 67.751  
— 66.736  
— 41.181

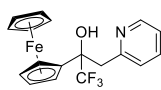

**3bp**

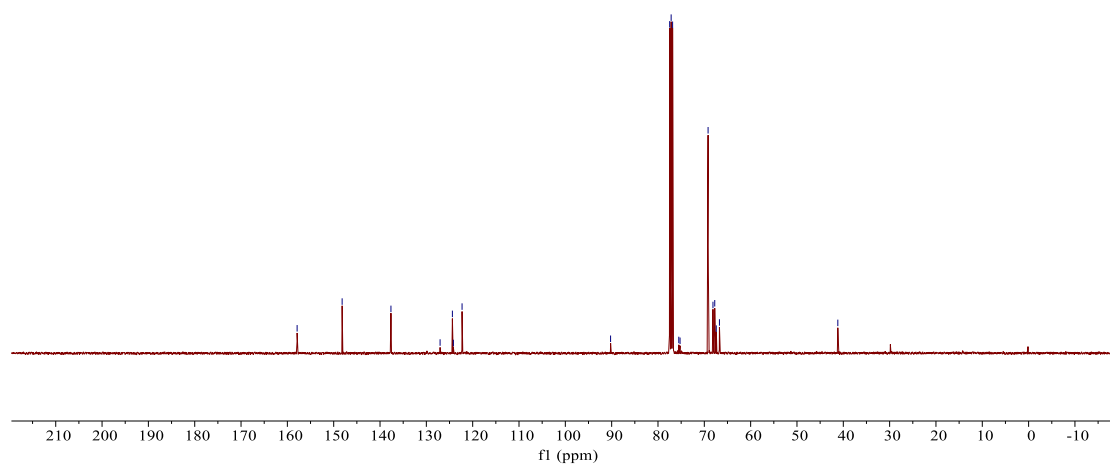

<sup>19</sup>F NMR (CDCl<sub>3</sub>) for **3bp**

HCM-459a.3.fid

— -78.083

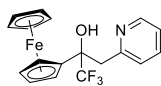

**3bp**

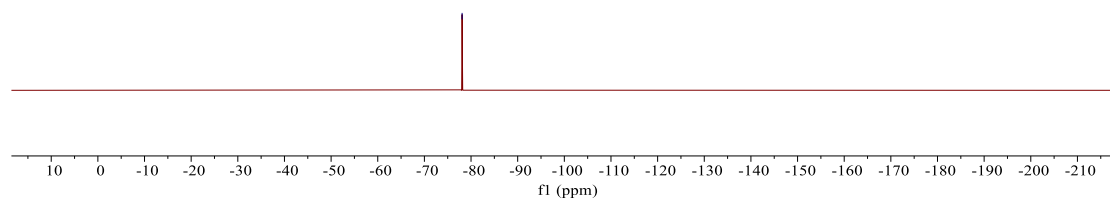

<sup>1</sup>H NMR (CDCl<sub>3</sub>) for **3ca**

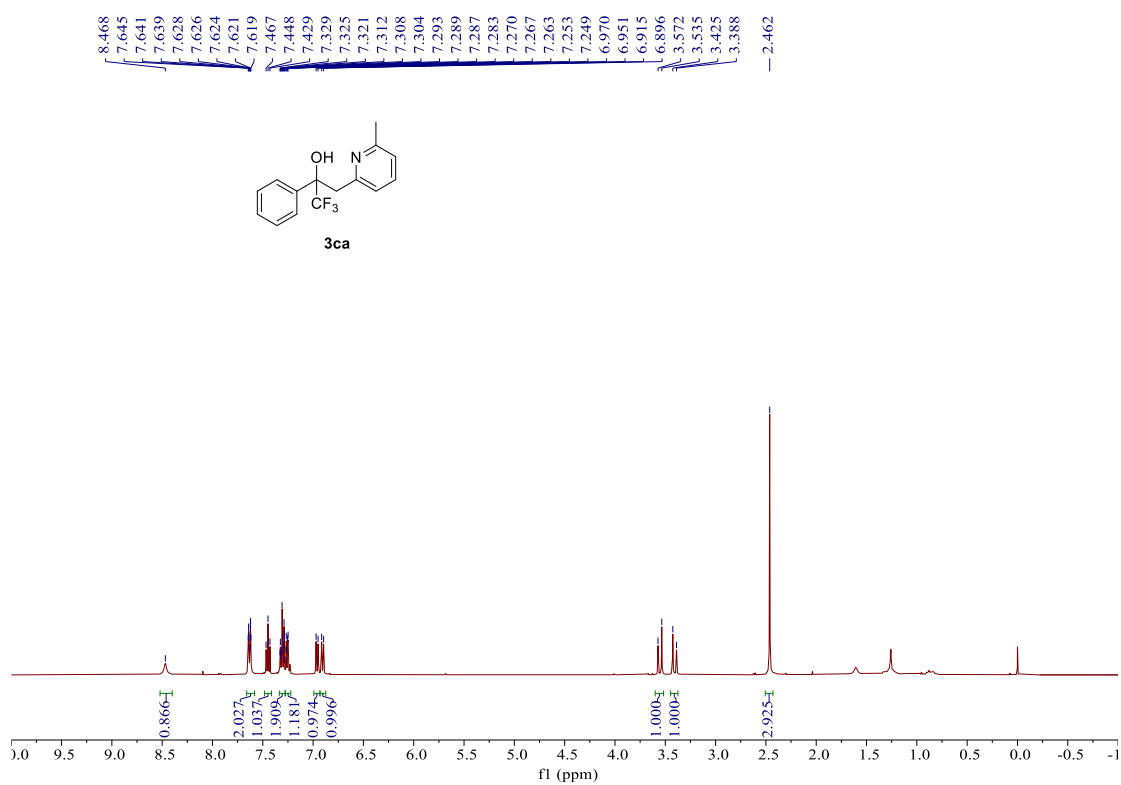

<sup>13</sup>C NMR (CDCl<sub>3</sub>) for **3ca**

hem-407a.5.fid

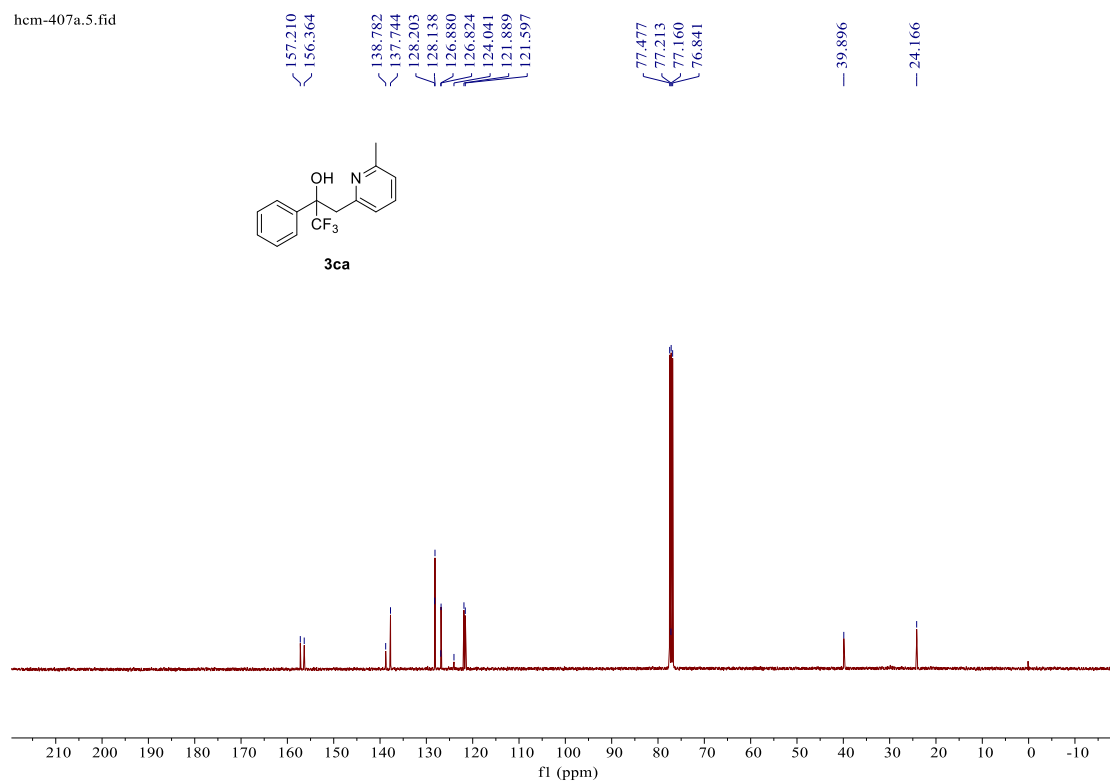

<sup>19</sup>F NMR (CDCl<sub>3</sub>) for **3ca**

hem-407a.3.fid

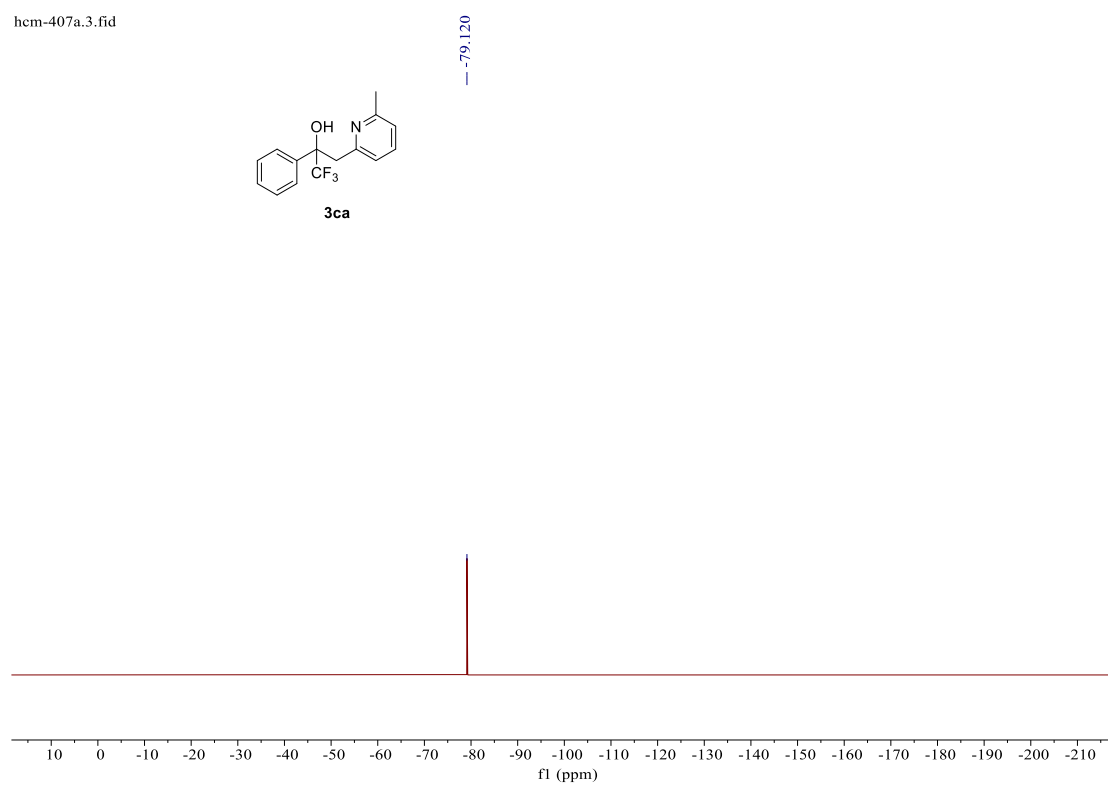

<sup>1</sup>H NMR (CDCl<sub>3</sub>) for **3da**

hem-407b.1.fid

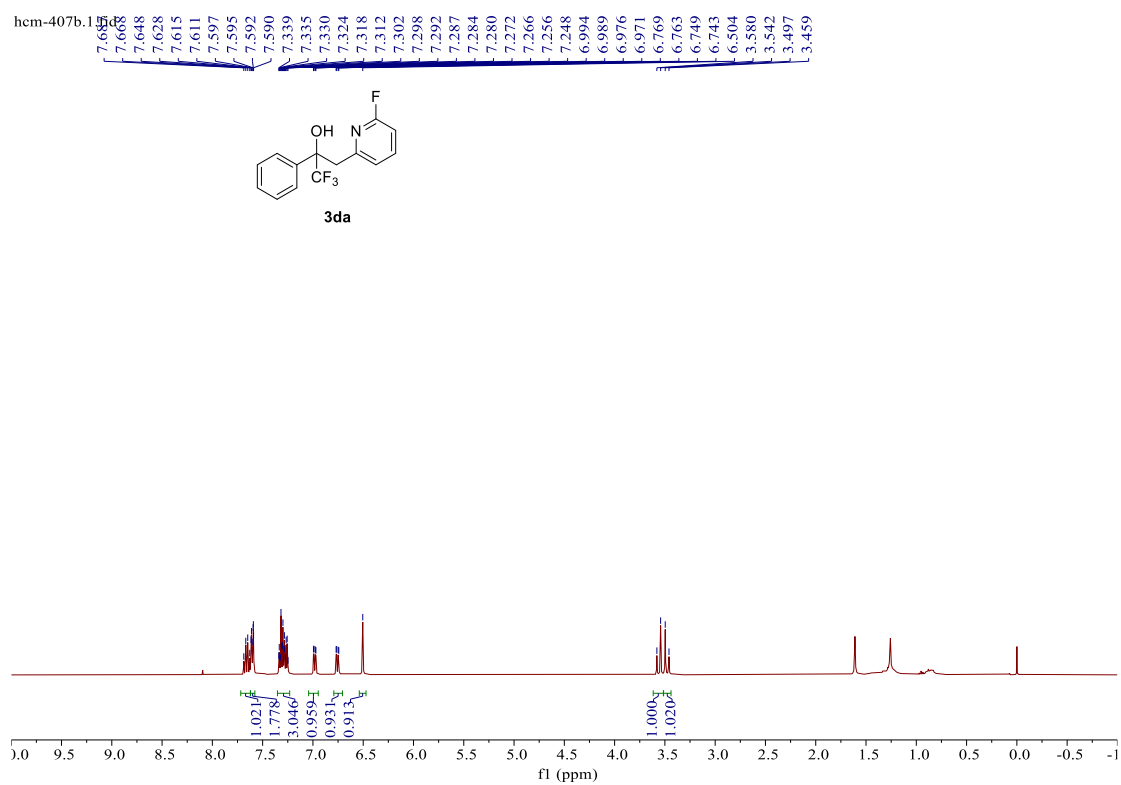

<sup>13</sup>C NMR (CDCl<sub>3</sub>) for **3da**

hem-407b.4.fid

163.602  
161.174  
155.632  
155.517  
142.324  
142.244  
137.795  
128.488  
128.298  
126.782  
126.635  
123.796  
121.976  
121.934  
108.400  
108.053  
77.477  
77.240  
77.160  
76.956  
76.843  
— 40.350

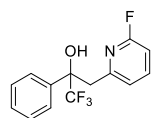

**3da**

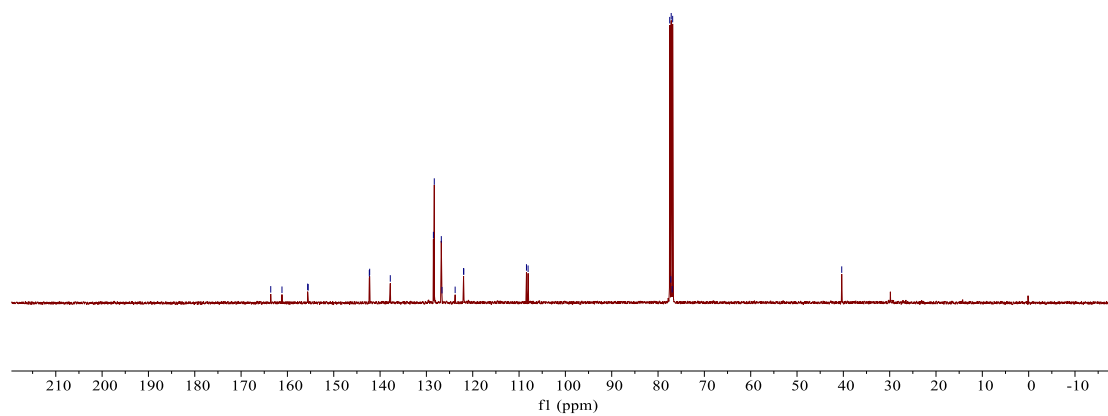

<sup>19</sup>F NMR (CDCl<sub>3</sub>) for **3da**

hem-407b.5.fid

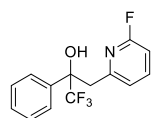

**3da**

-67.273  
-79.177

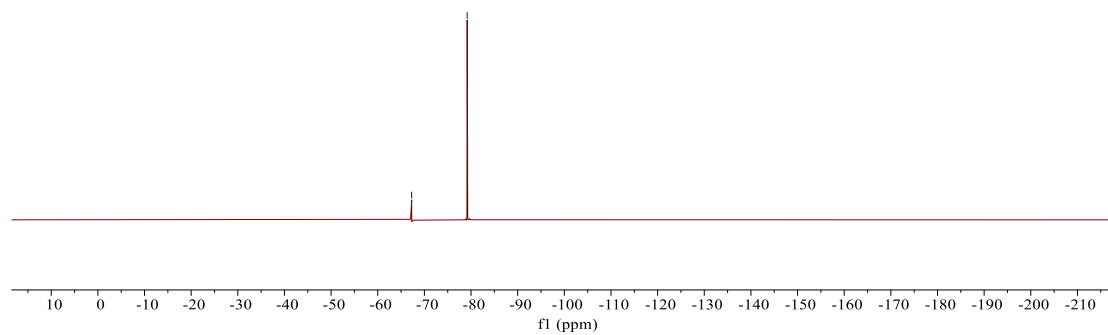



<sup>1</sup>H NMR (CDCl<sub>3</sub>) for **3ea**

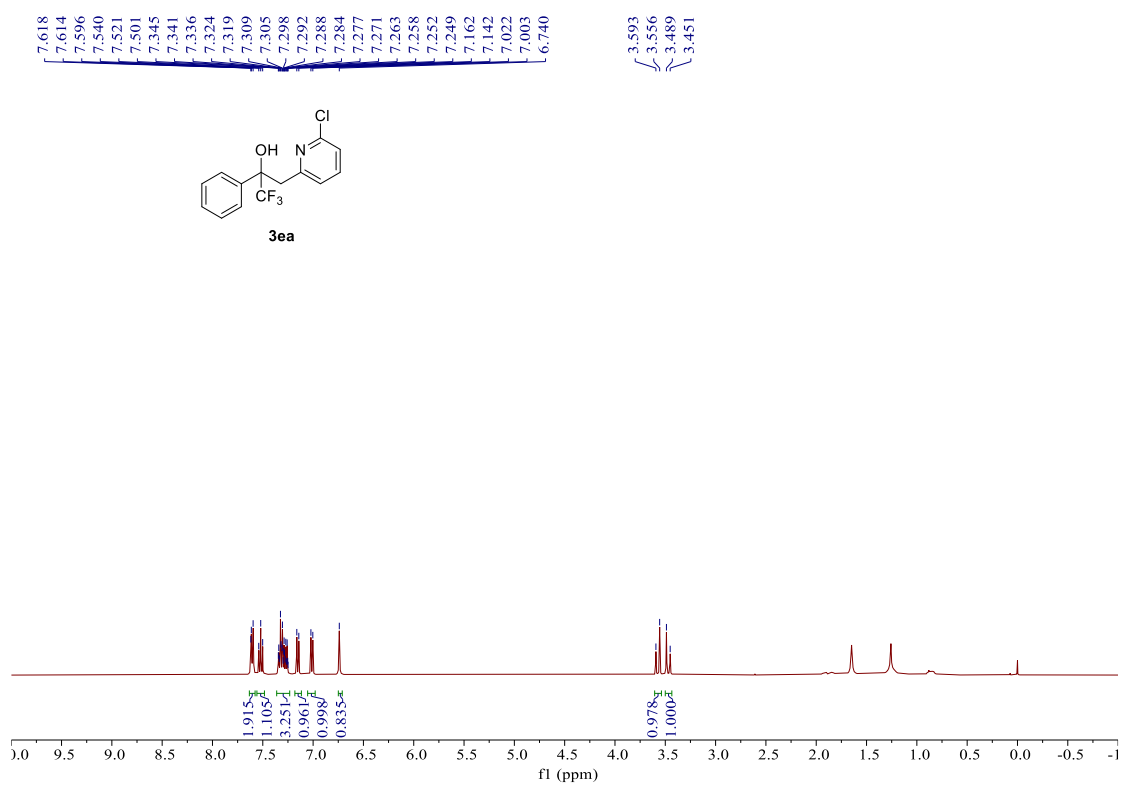

<sup>13</sup>C NMR (CDCl<sub>3</sub>) for **3ea**

HCM-426b.3.fid

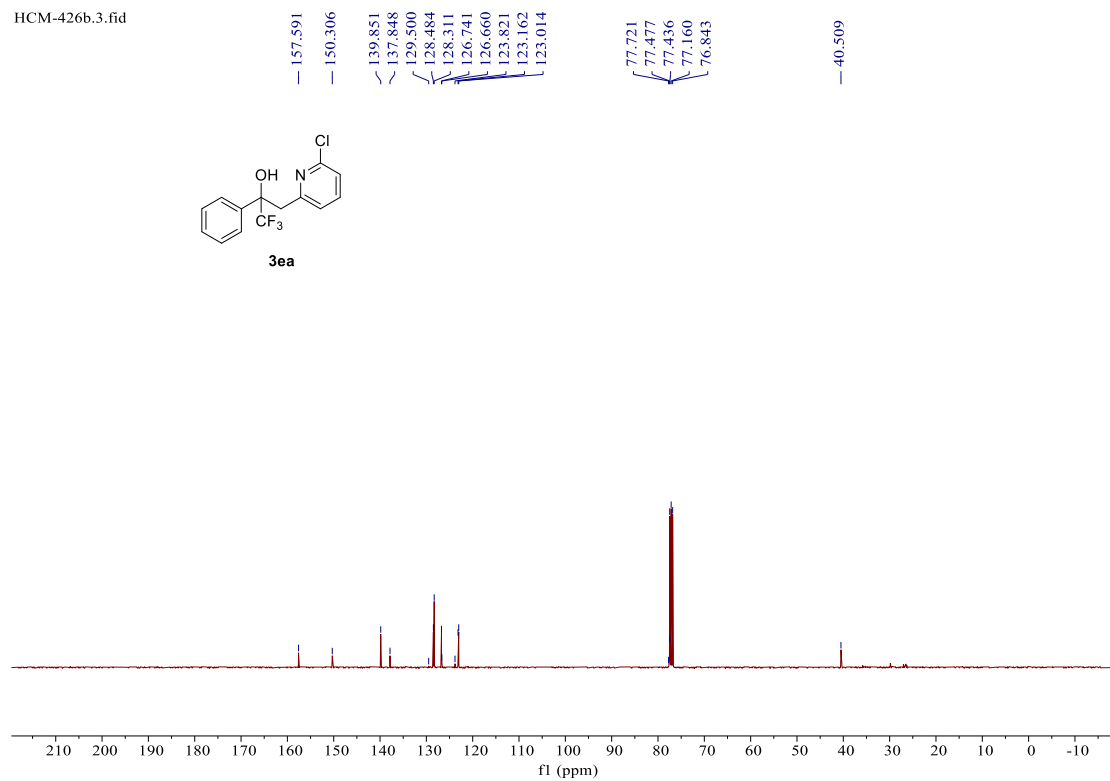

<sup>19</sup>F NMR (CDCl<sub>3</sub>) for **3ea**

HCM-426b.2.fid

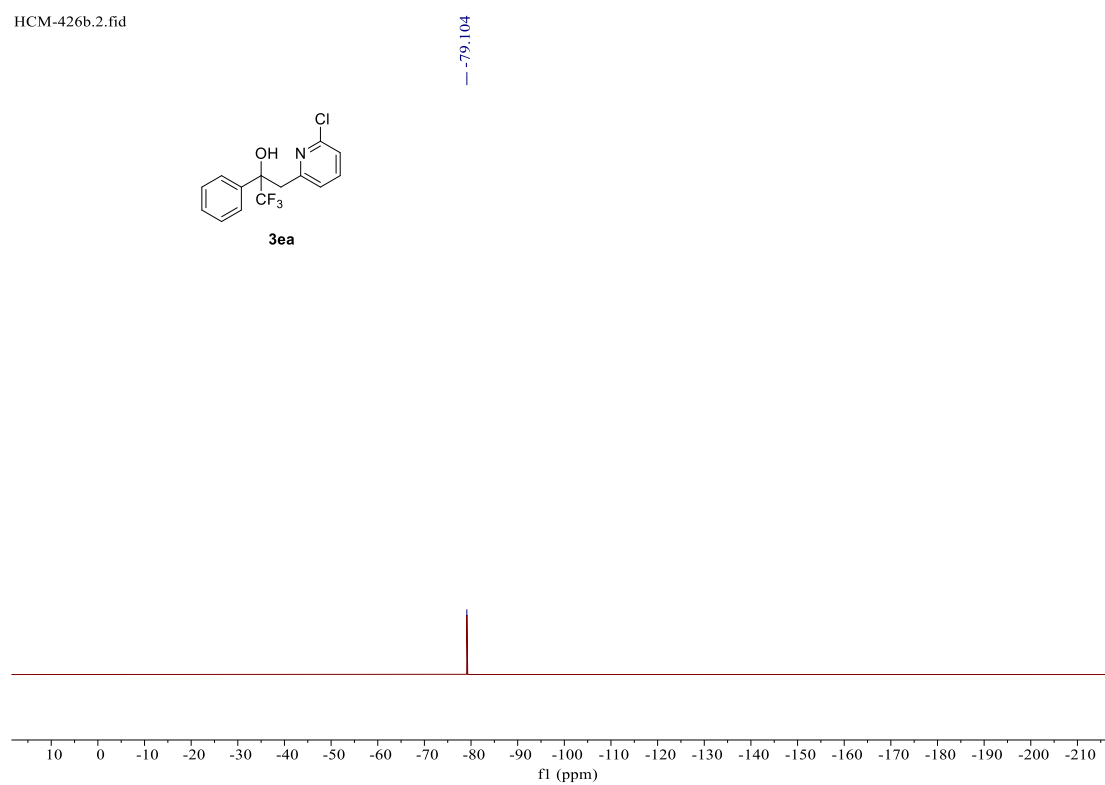

<sup>1</sup>H NMR (CDCl<sub>3</sub>) for **3fa**

HCM-1H.6.fid  
HCM-786

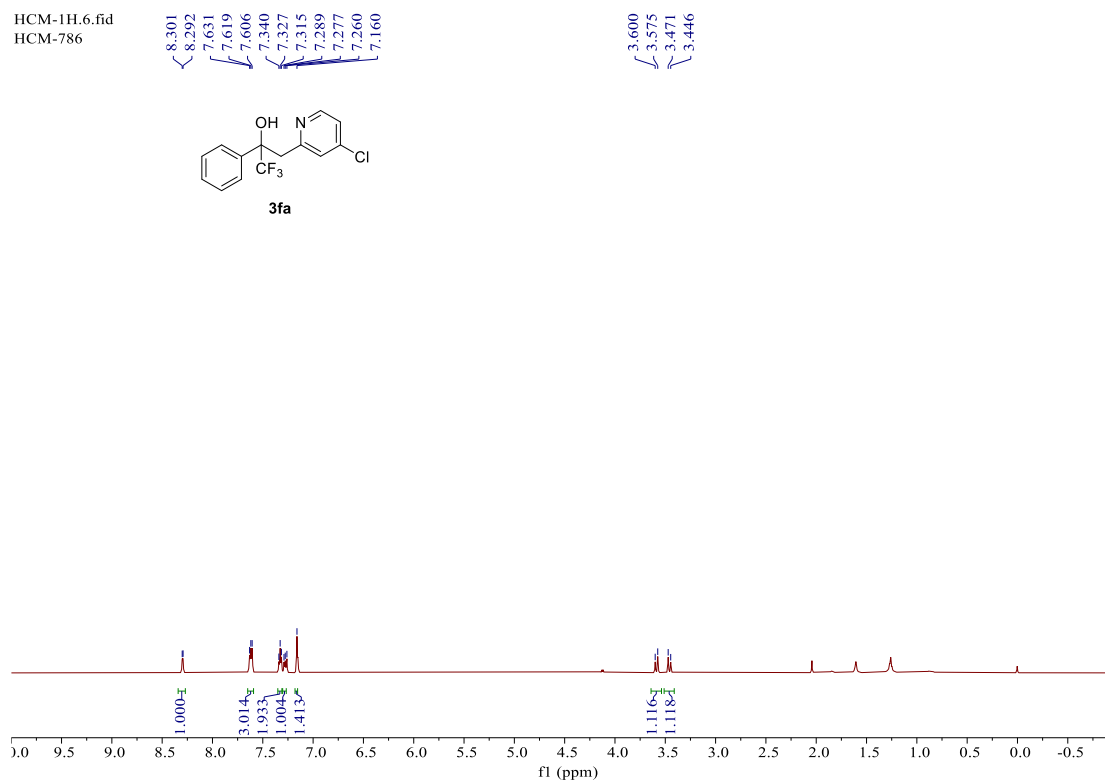

<sup>13</sup>C NMR (CDCl<sub>3</sub>) for **3fa**

HCM-13C.13.fid  
HCM-786

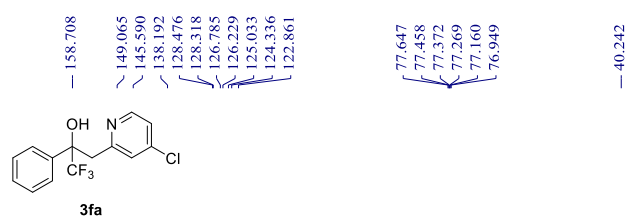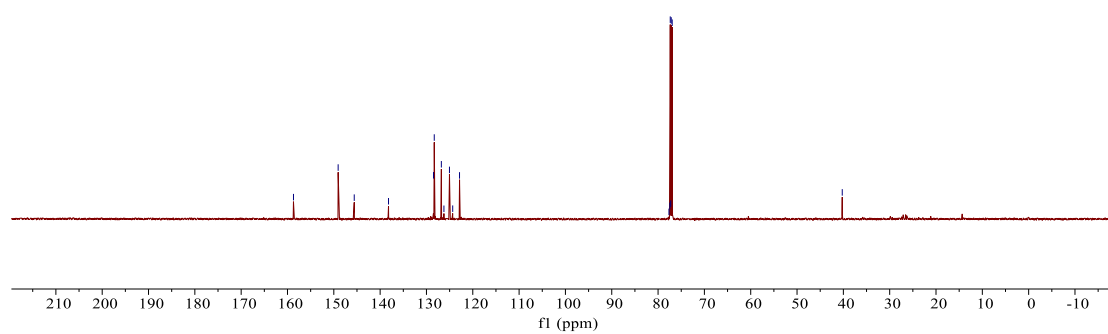

<sup>19</sup>F NMR (CDCl<sub>3</sub>) for **3fa**

HCM-13C.14.fid  
HCM-786 (19F)

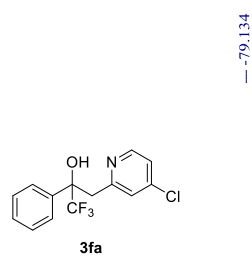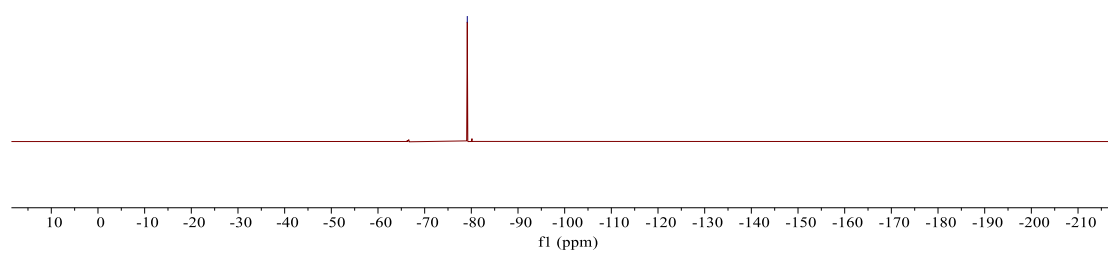

<sup>1</sup>H NMR (CDCl<sub>3</sub>) for **5ba**

HCM-5a.1.fid

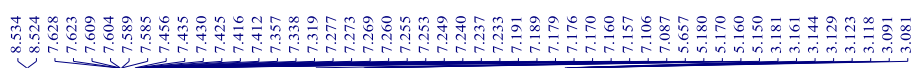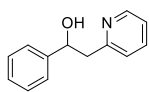

**5ba**

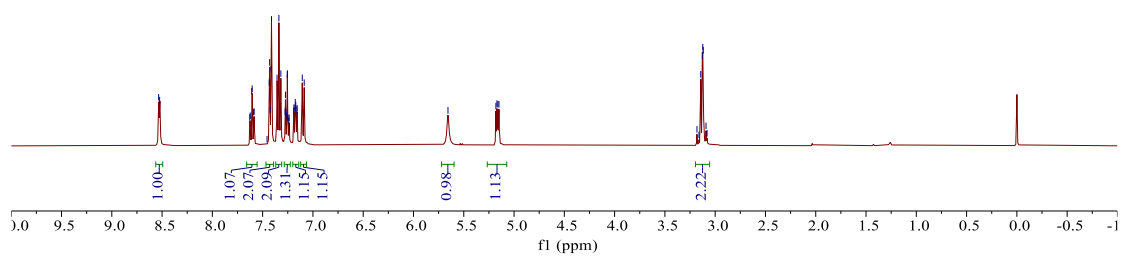

<sup>13</sup>C NMR (CDCl<sub>3</sub>) for **5ba**

HCM-5a.2.fid

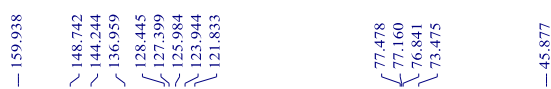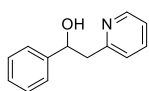

**5ba**

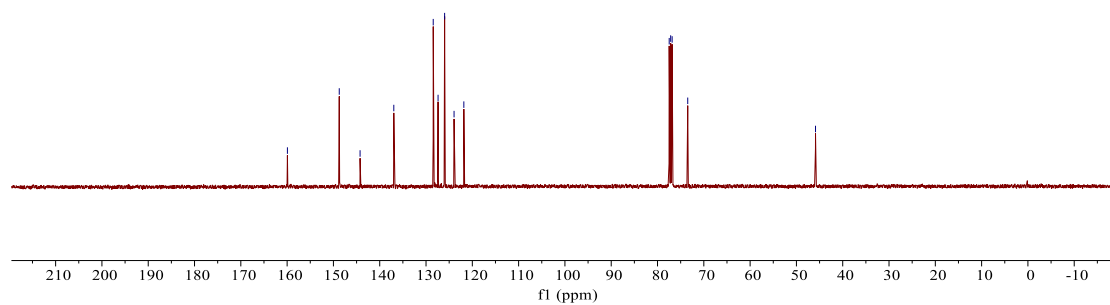

<sup>1</sup>H NMR (CDCl<sub>3</sub>) for **5bb**

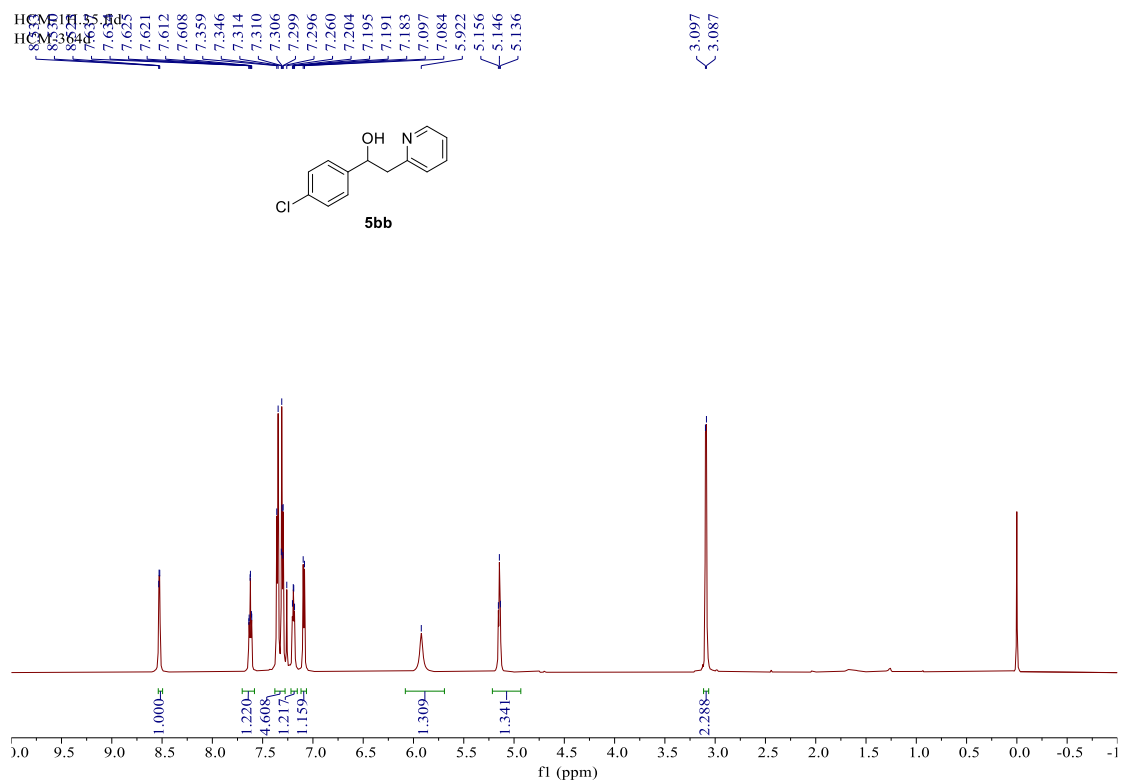

<sup>13</sup>C NMR (CDCl<sub>3</sub>) for **5bb**

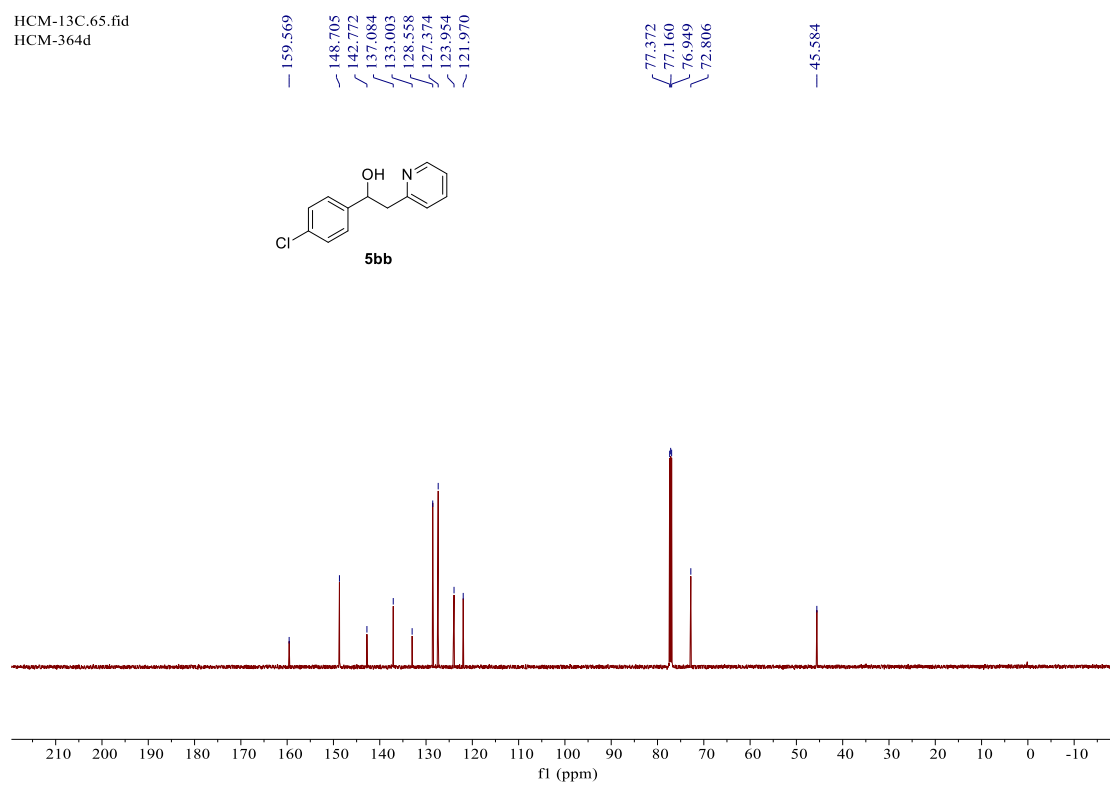

<sup>1</sup>H NMR (CDCl<sub>3</sub>) for **5bc**

364c.131.fid  
8.4516  
8.4466  
8.4414  
8.4358  
8.4306  
8.4253  
8.521  
7.632  
7.627  
7.613  
7.608  
7.593  
7.589  
7.528  
7.523  
7.513  
7.508  
7.260  
7.192  
7.189  
7.180  
7.177  
7.172  
7.167  
7.160  
7.157  
7.147  
7.117  
7.098  
5.539  
5.154  
5.144  
5.132  
5.123  
3.159  
3.143  
3.121  
3.117  
3.108  
3.080  
3.071  
2.345

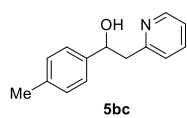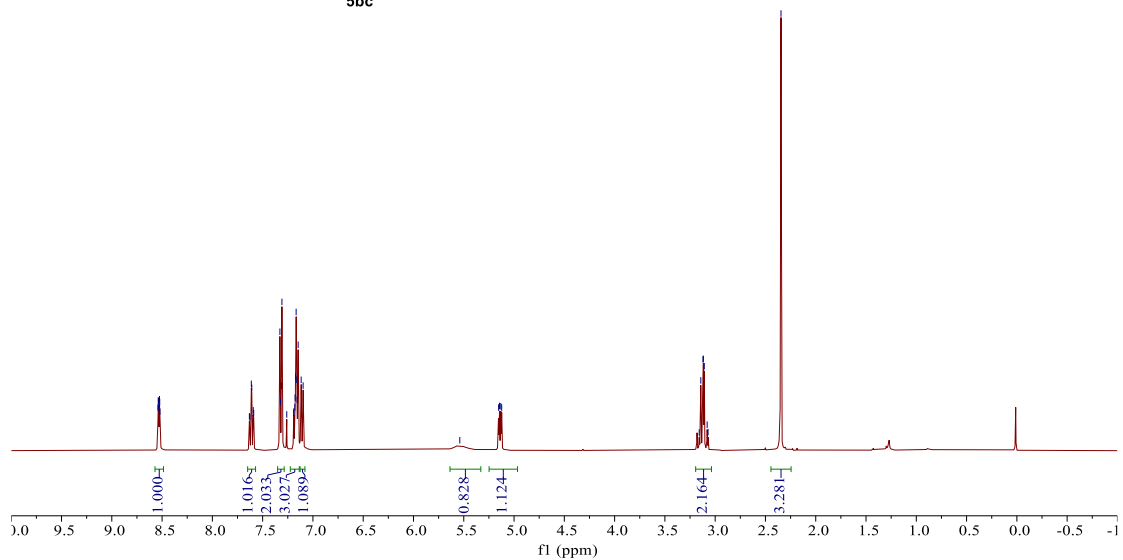

<sup>13</sup>C NMR (CDCl<sub>3</sub>) for **5bc**

364c.2.fid

160.012  
148.732  
141.306  
136.960  
136.907  
129.111  
125.907  
123.943  
121.770  
77.470  
77.160  
76.842  
73.325  
45.960  
21.217

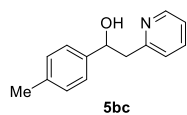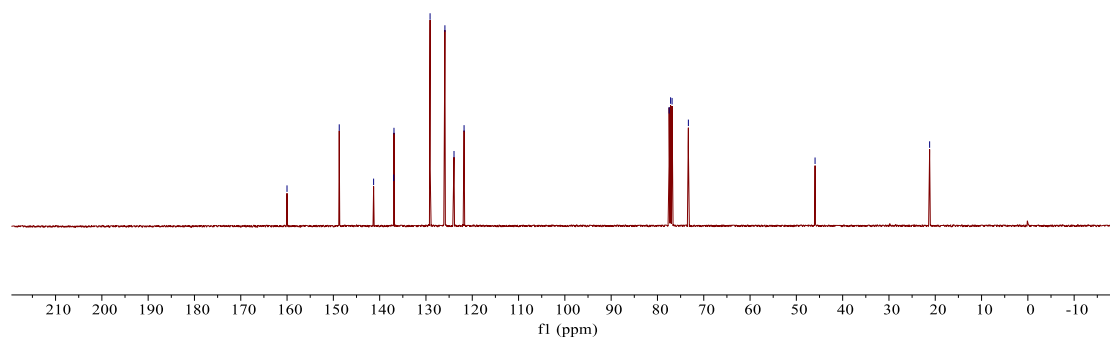

<sup>1</sup>H NMR (CDCl<sub>3</sub>) for **5bd**

hem-415a.15  
8.565  
8.563  
8.558  
8.552  
8.550  
8.546  
7.654  
7.650  
7.635  
7.630  
7.616  
7.612  
7.608  
7.603  
7.598  
7.592  
7.588  
7.582  
7.577  
7.515  
7.510  
7.499  
7.494  
7.455  
7.450  
7.437  
7.433  
7.422  
7.417  
7.360  
7.357  
7.353  
7.344  
7.338  
7.333  
7.320  
7.260  
7.216  
7.214  
7.204  
7.201  
7.197  
7.194  
7.185  
7.182  
7.146  
7.127  
5.241  
5.231  
5.221  
5.211  
3.194  
3.180  
3.174  
3.170

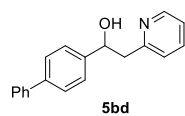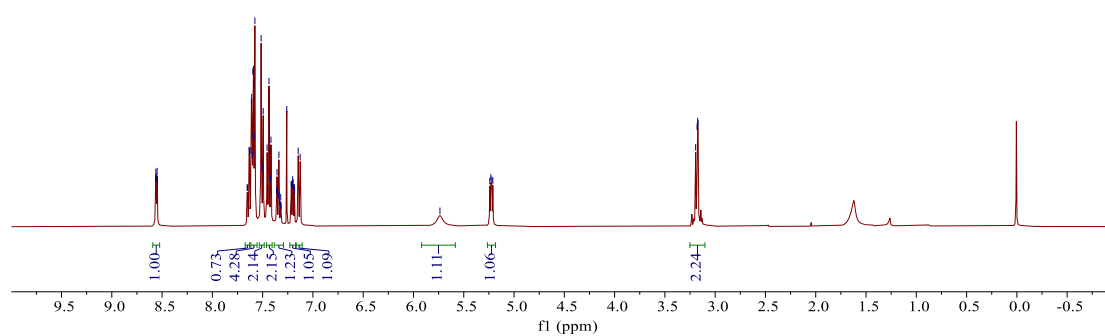

<sup>13</sup>C NMR (CDCl<sub>3</sub>) for **5bd**

hem-415a.2.fid

159.928  
148.772  
143.311  
141.177  
140.373  
137.032  
128.874  
127.312  
127.237  
126.443  
123.990  
121.900  
77.477  
77.160  
76.843  
73.268  
45.780

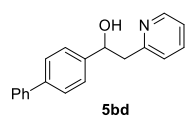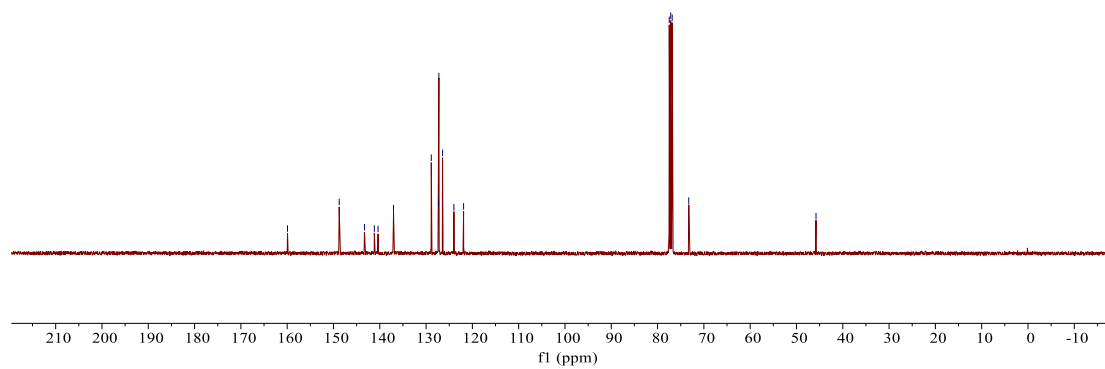

<sup>1</sup>H NMR (CDCl<sub>3</sub>) for **5be**

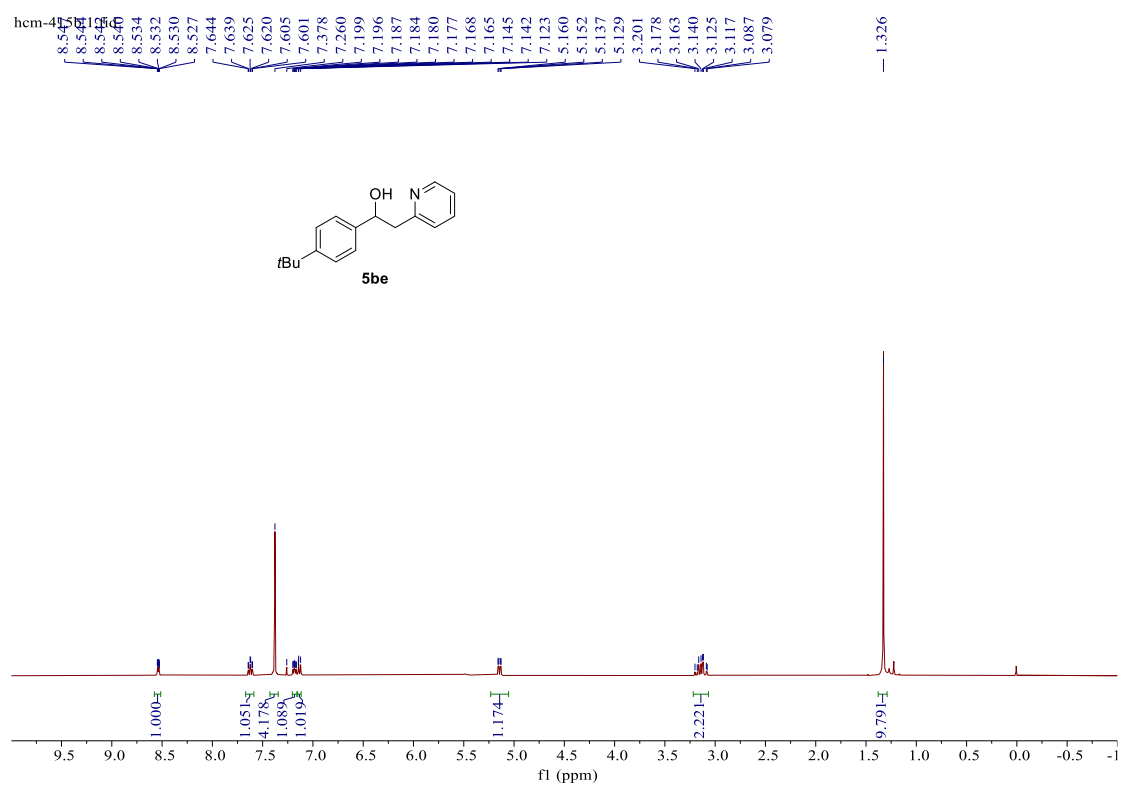

<sup>13</sup>C NMR (CDCl<sub>3</sub>) for **5be**

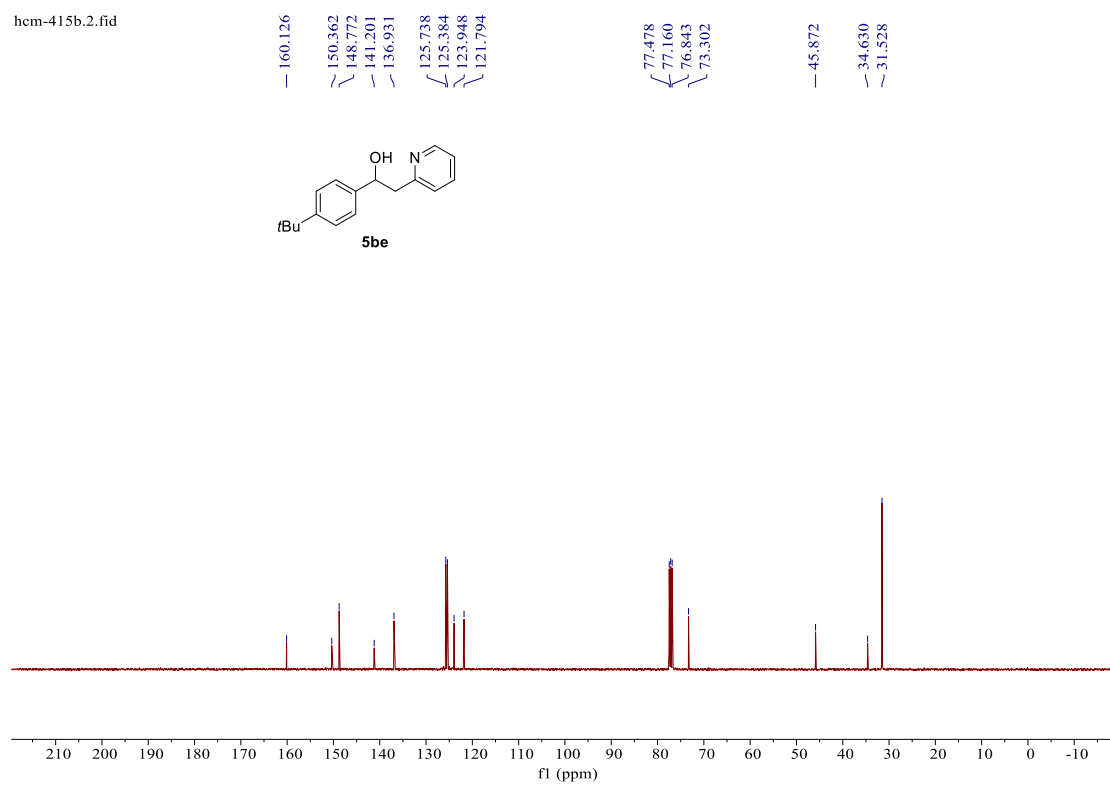



<sup>1</sup>H NMR (CDCl<sub>3</sub>) for **5bf**

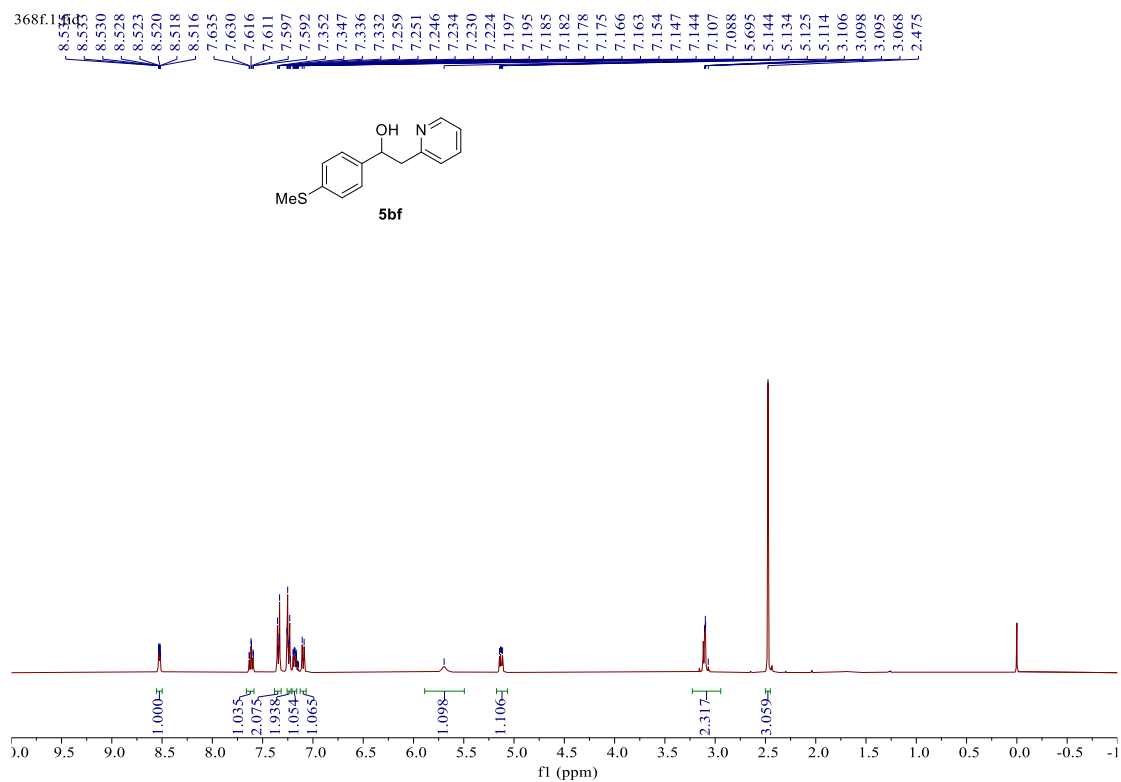

<sup>13</sup>C NMR (CDCl<sub>3</sub>) for **5bf**

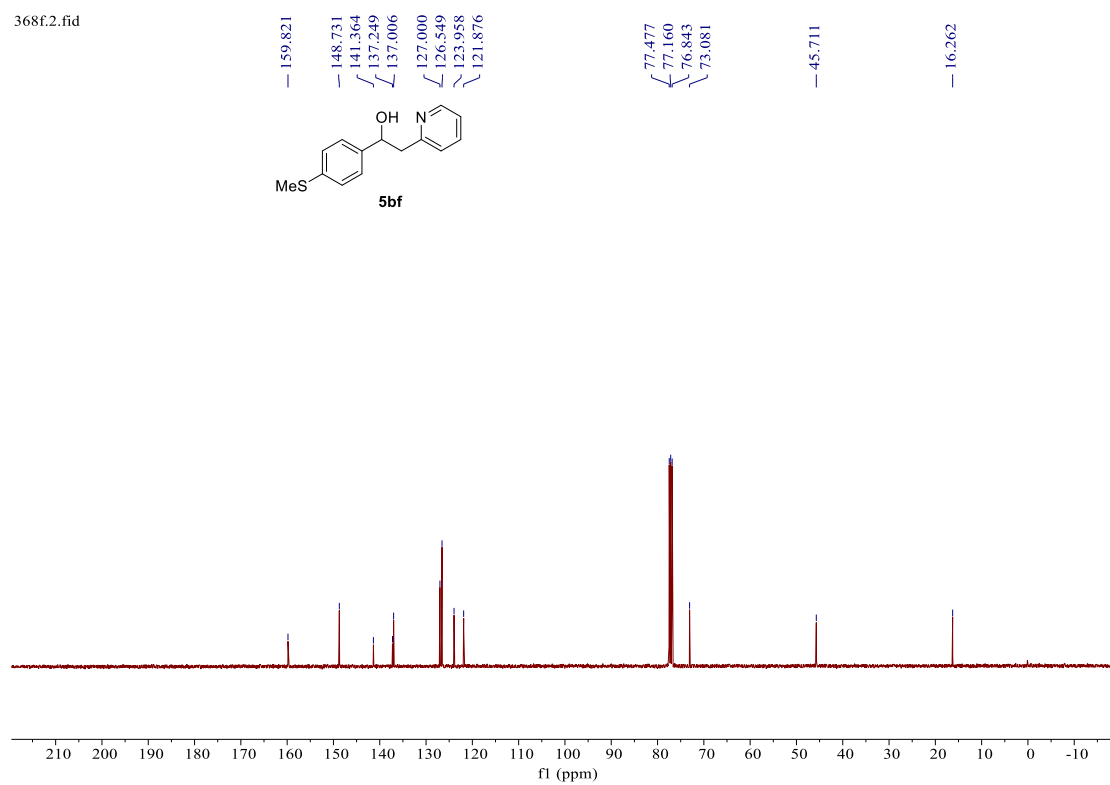

<sup>1</sup>H NMR (CDCl<sub>3</sub>) for **5bg**

HCM-1H.97.fid  
HCM-778

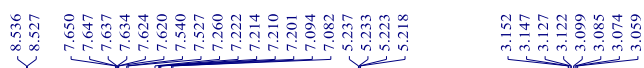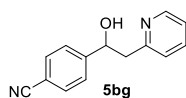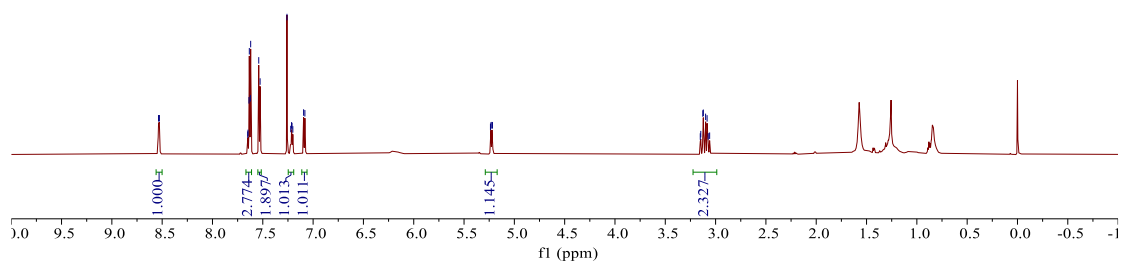

<sup>13</sup>C NMR (CDCl<sub>3</sub>) for **5bg**

HCM-13C.9.fid  
HCM-778

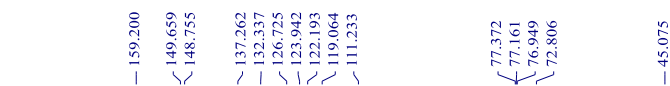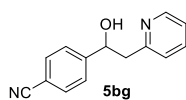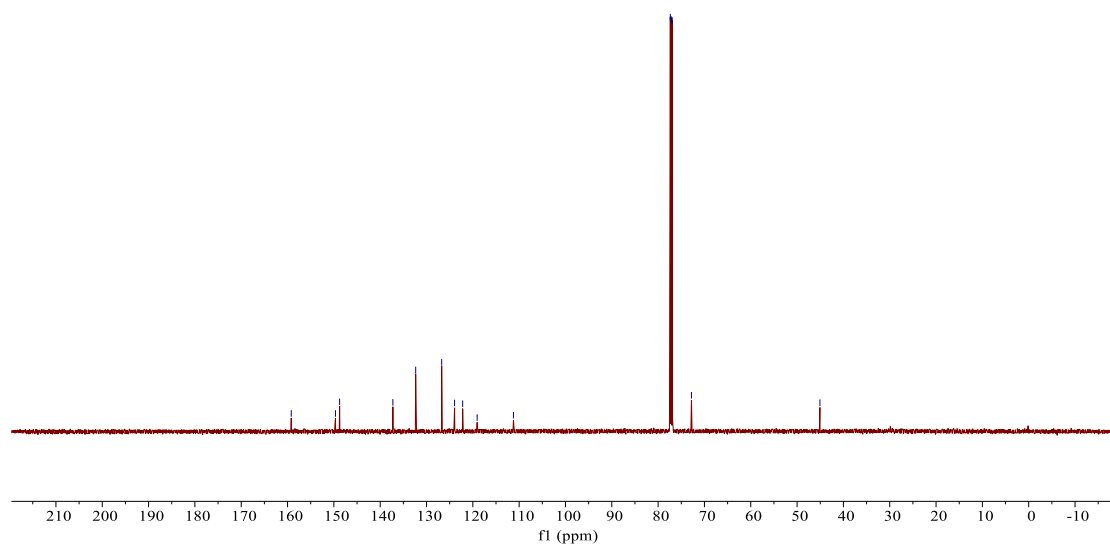

<sup>1</sup>H NMR (CDCl<sub>3</sub>) for **5bh**

HCM-1H.4.fid  
HCM-791B

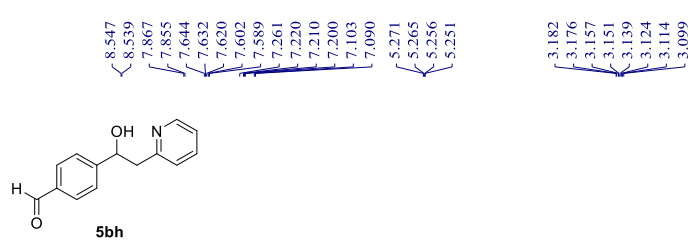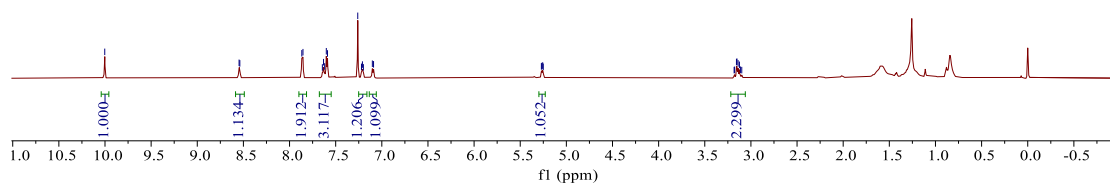

<sup>13</sup>C NMR (CDCl<sub>3</sub>) for **5bh**

791B2.1.fid

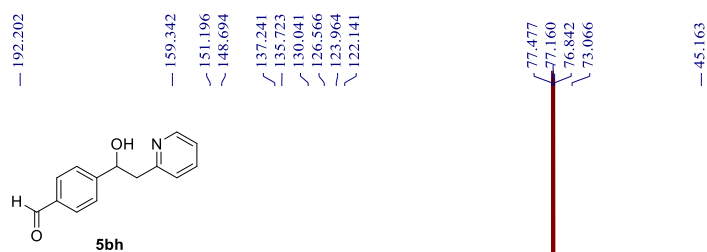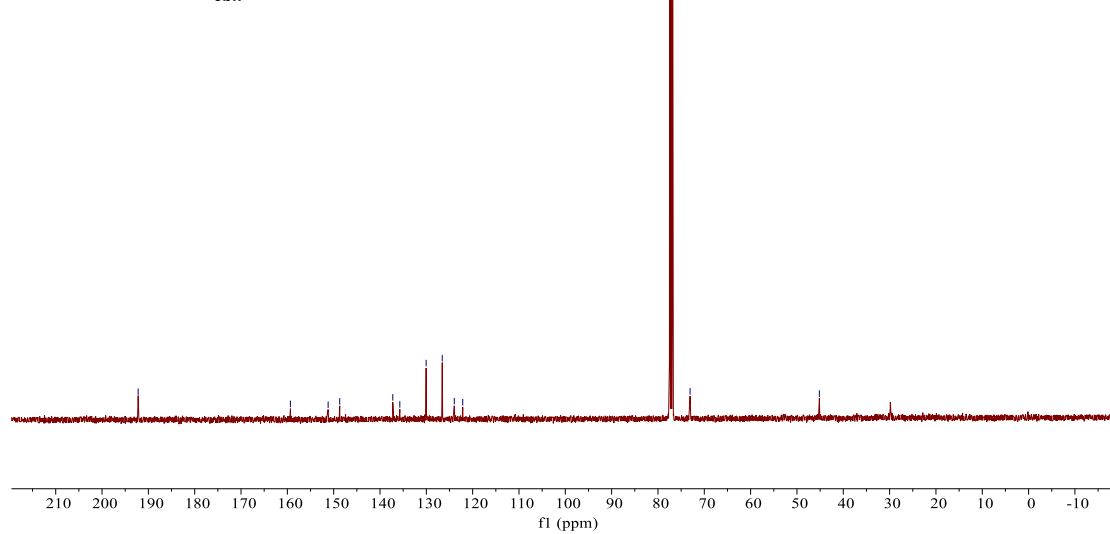

<sup>1</sup>H NMR (CDCl<sub>3</sub>) for **5bi**

HCM-5e.2.fid  
8.544  
8.543  
8.542  
8.537  
8.532  
8.529  
8.527  
8.525  
7.672  
7.668  
7.653  
7.648  
7.637  
7.633  
7.618  
7.613  
7.599  
7.594  
7.338  
7.335  
7.319  
7.315  
7.288  
7.285  
7.279  
7.270  
7.266  
7.256  
7.251  
7.247  
7.206  
7.201  
7.195  
7.192  
7.187  
7.182  
7.176  
7.173  
7.168  
7.163  
7.125  
7.105  
5.519  
5.513  
5.497  
5.490  
3.277  
3.271  
3.239  
3.233  
3.032  
3.010  
2.995  
2.972

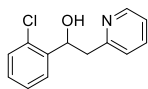

**5bi**

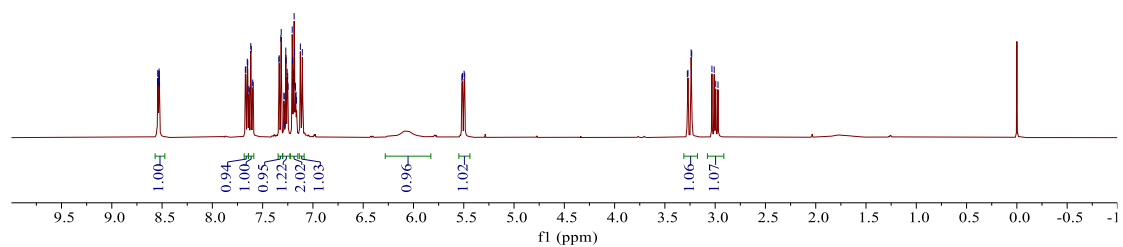

<sup>13</sup>C NMR (CDCl<sub>3</sub>) for **5bi**

HCM-5e.2.fid

159.825  
148.633  
141.487  
137.120  
131.544  
129.304  
128.343  
127.631  
127.130  
123.893  
121.964  
77.478  
77.160  
76.842  
70.228  
43.528

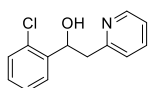

**5bi**

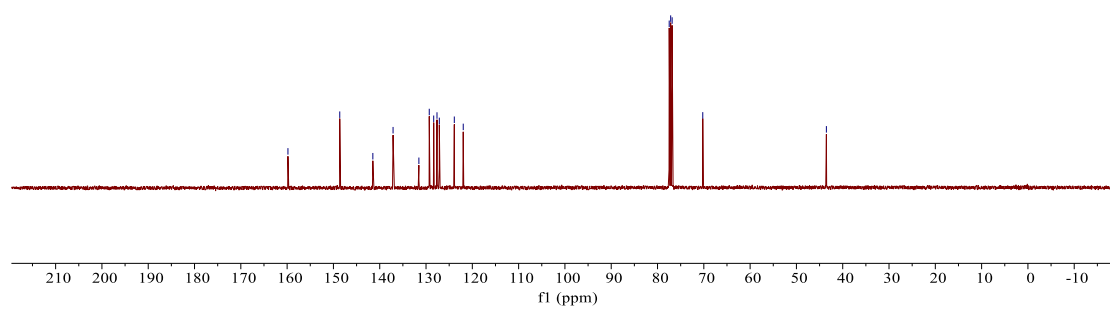

<sup>1</sup>H NMR (CDCl<sub>3</sub>) for **5bj**

HCM-5f.1.fid  
8.539  
8.533  
8.526  
8.520  
8.515  
7.647  
7.643  
7.628  
7.624  
7.620  
7.609  
7.604  
7.440  
7.436  
7.431  
7.305  
7.301  
7.296  
7.287  
7.283  
7.278  
7.274  
7.258  
7.242  
7.239  
7.233  
7.228  
7.220  
7.215  
7.209  
7.199  
7.196  
7.192  
7.189  
7.177  
7.109  
7.089  
5.934  
5.156  
5.140  
5.125  
3.109  
3.094

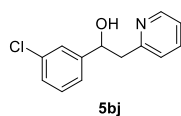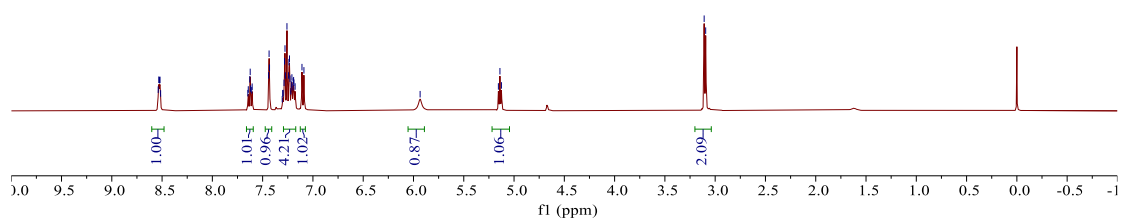

<sup>13</sup>C NMR (CDCl<sub>3</sub>) for **5bj**

HCM-5f.2.fid

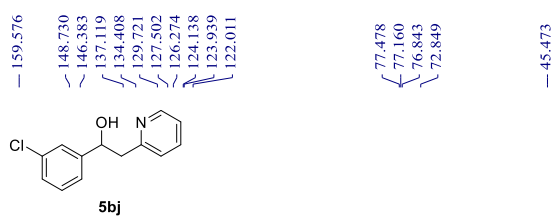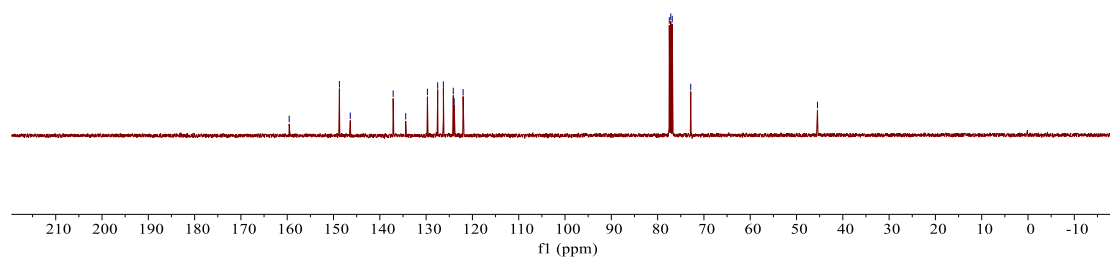

<sup>1</sup>H NMR (CDCl<sub>3</sub>) for **5bk**

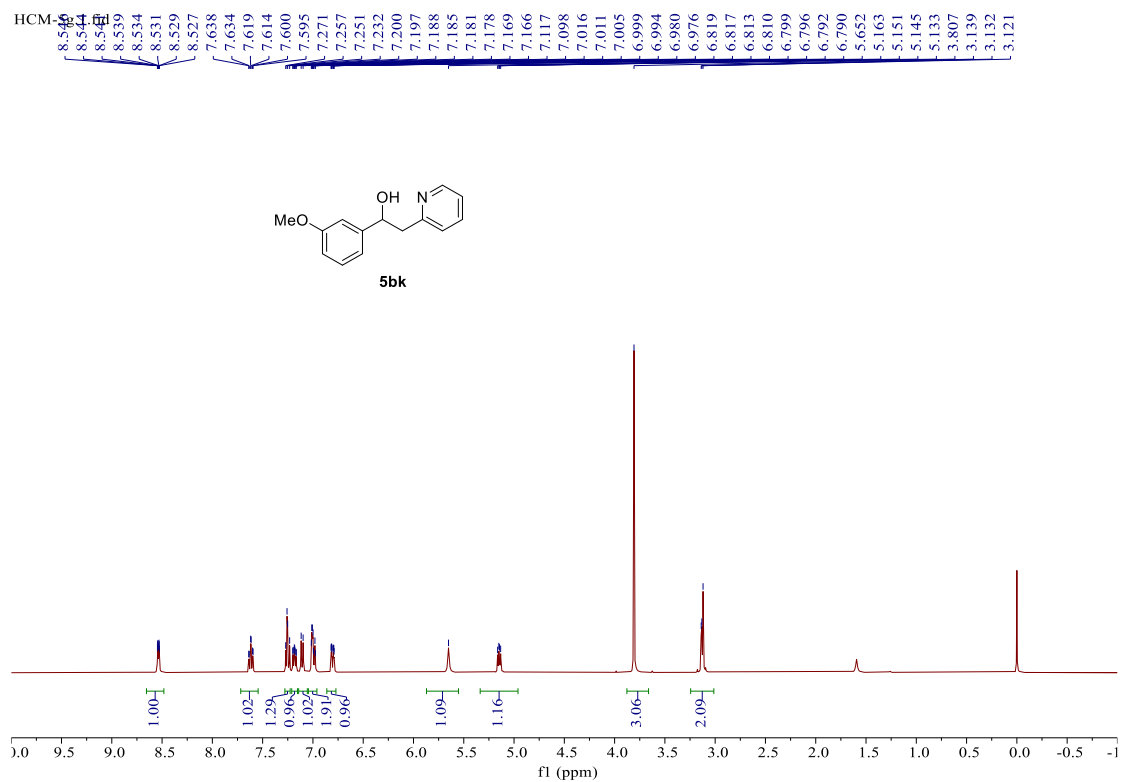

<sup>13</sup>C NMR (CDCl<sub>3</sub>) for **5bk**

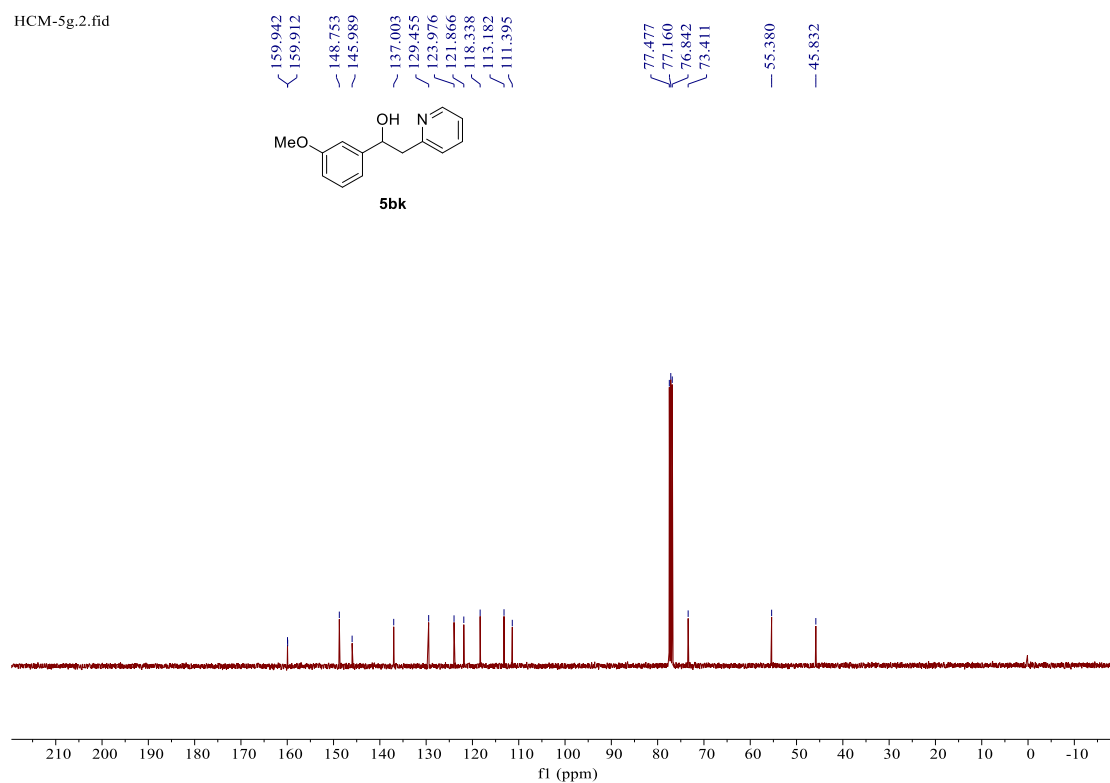

<sup>1</sup>H NMR (CDCl<sub>3</sub>) for **5bl**

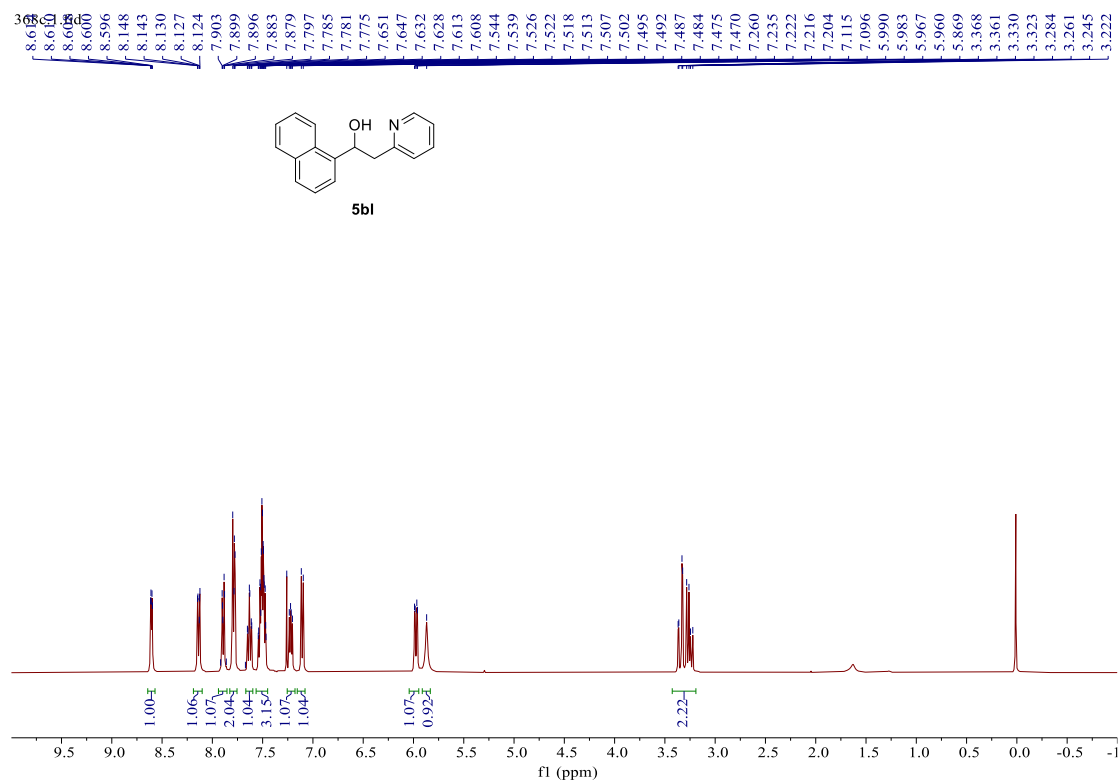

<sup>13</sup>C NMR (CDCl<sub>3</sub>) for **5bl**

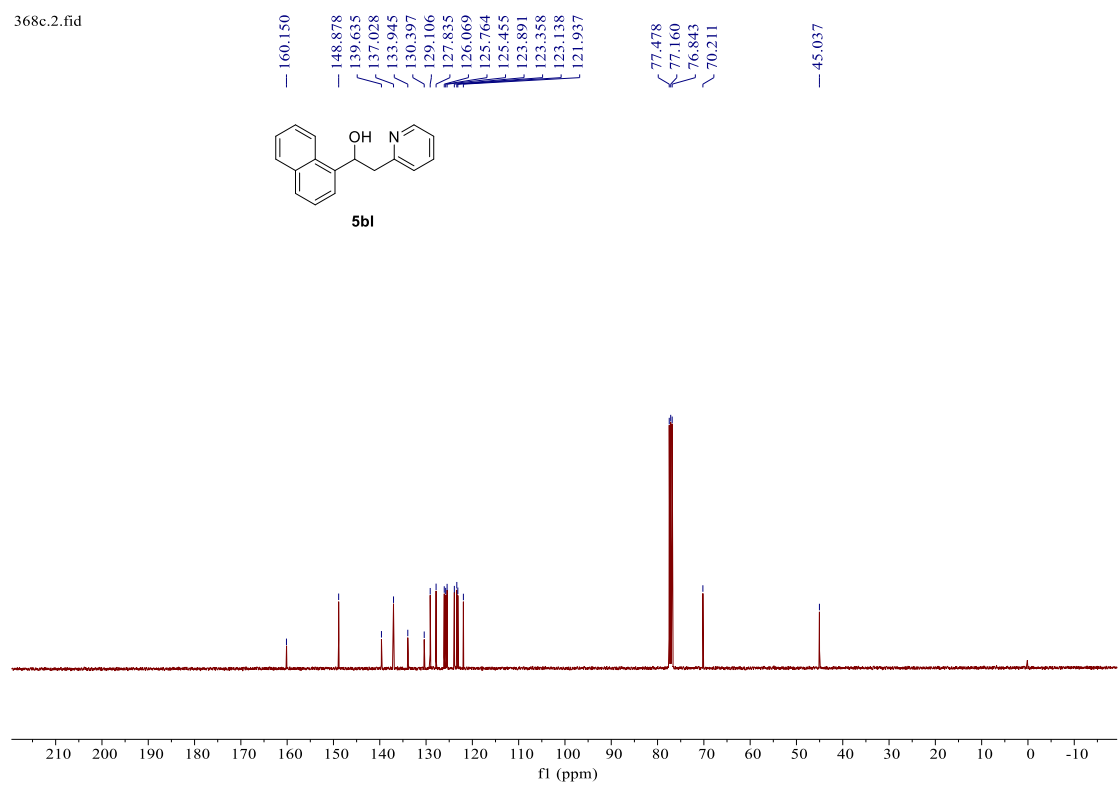

<sup>1</sup>H NMR (CDCl<sub>3</sub>) for **5bm**

HCM-400a.2.fid  
8.515, 8.511, 8.506, 8.503, 8.499, 7.648, 7.643, 7.628, 7.624, 7.609, 7.605, 7.568, 7.566, 7.563, 7.561, 7.260, 7.196, 7.193, 7.184, 7.181, 7.175, 7.165, 7.161, 7.158, 7.139, 6.315, 6.310, 6.306, 6.302, 6.238, 6.236, 6.234, 6.230, 6.228, 6.226, 5.216, 5.208, 5.195, 5.186, 3.346, 3.325, 3.308, 3.287, 3.266, 3.257, 3.242, 3.228, 3.219

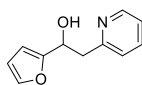

**5bm**

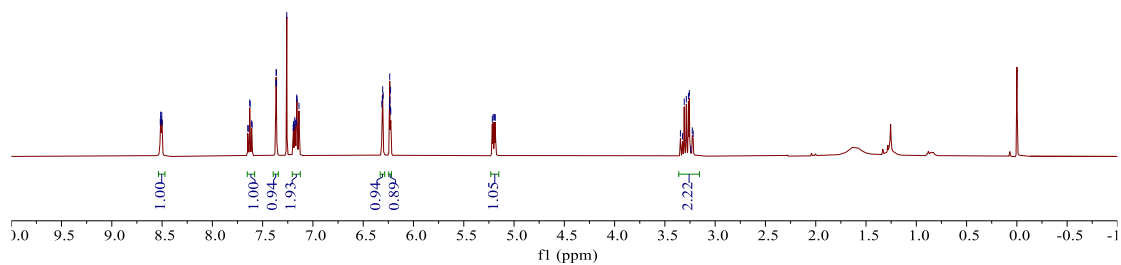

<sup>13</sup>C NMR (CDCl<sub>3</sub>) for **5bm**

HCM-400a.2.fid

159.518, 156.478, 148.718, 141.863, 137.008, 123.971, 121.914, 110.263, 105.960, 77.477, 77.159, 76.841, 67.469, 41.944

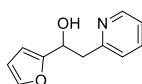

**5bm**

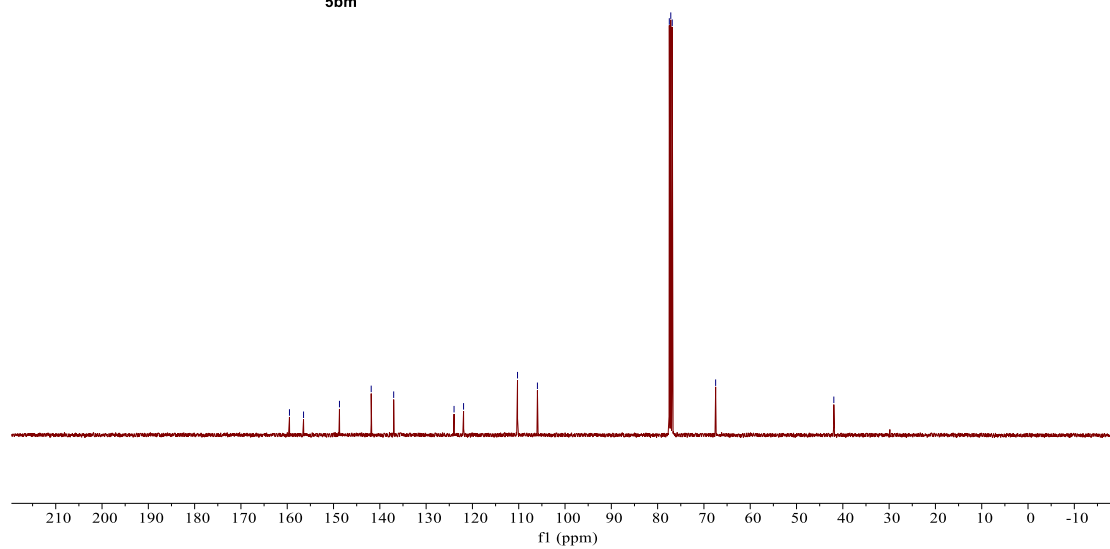



<sup>1</sup>H NMR (CDCl<sub>3</sub>) for **5bn**

HCM-5j.1.fid

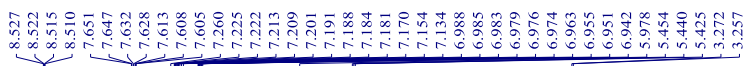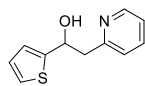

**5bn**

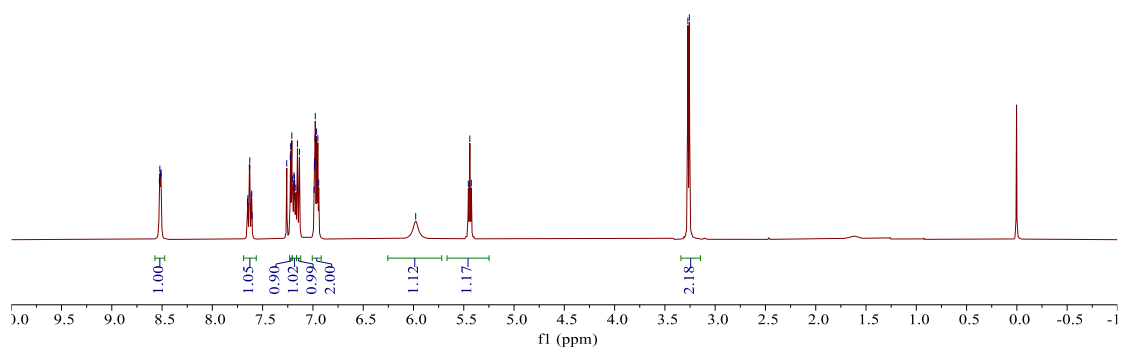

<sup>13</sup>C NMR (CDCl<sub>3</sub>) for **5bn**

HCM-5j.2.fid

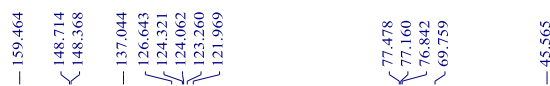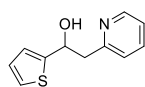

**5bn**

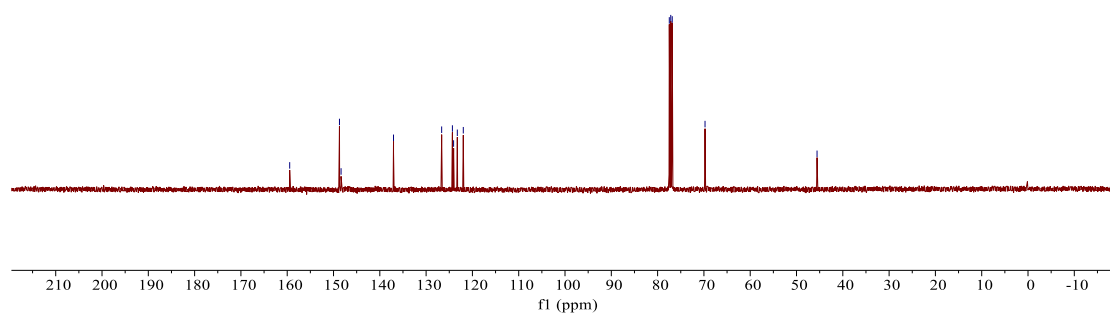

<sup>1</sup>H NMR (CDCl<sub>3</sub>) for **5bo**

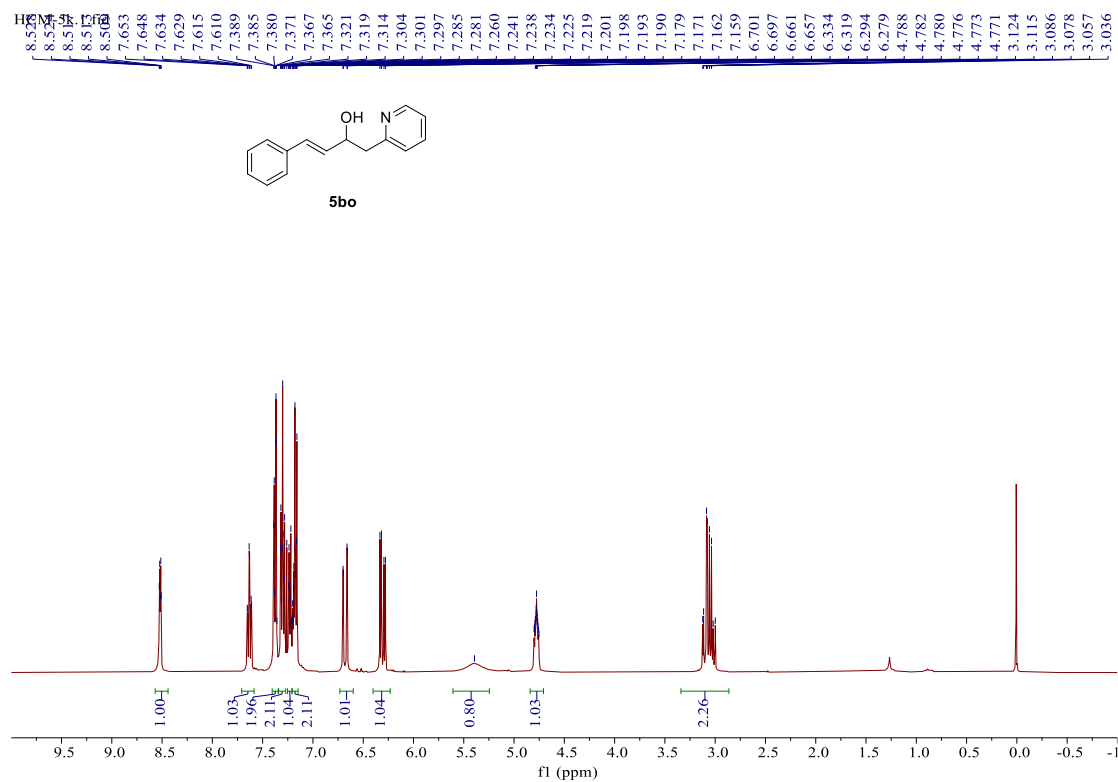

<sup>13</sup>C NMR (CDCl<sub>3</sub>) for **5bo**

HCM-5k.2.fid

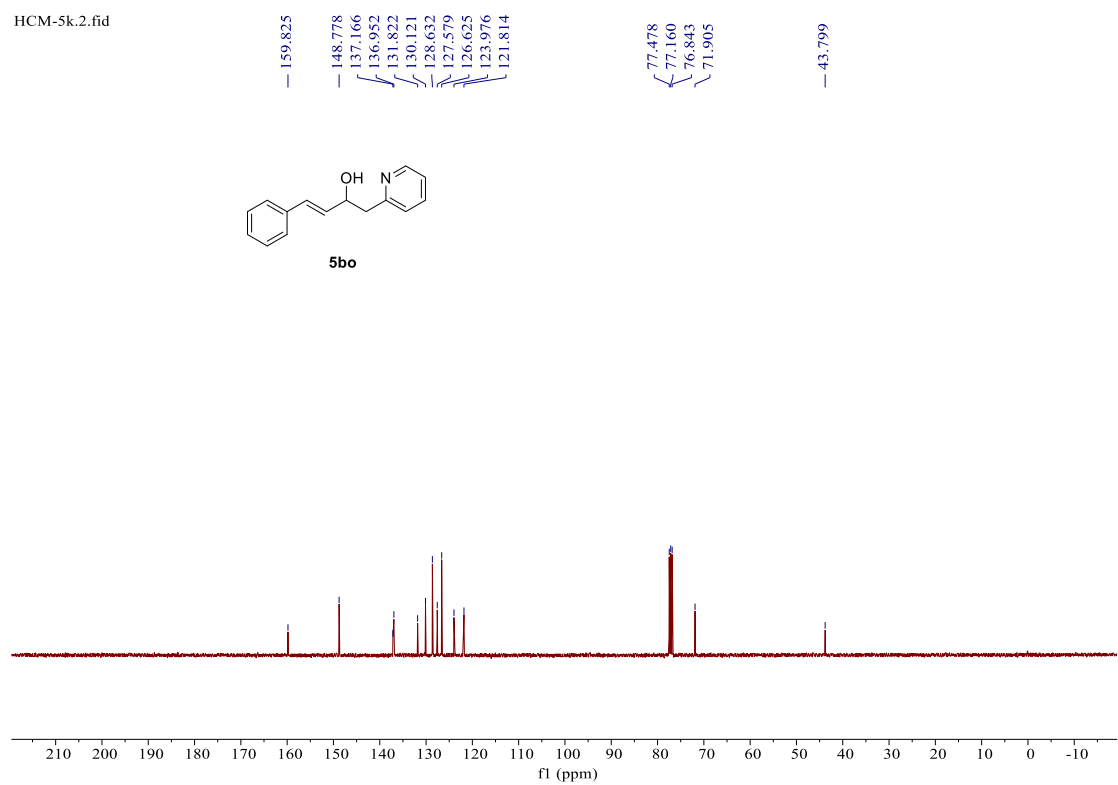

<sup>1</sup>H NMR (CDCl<sub>3</sub>) for **5bp**

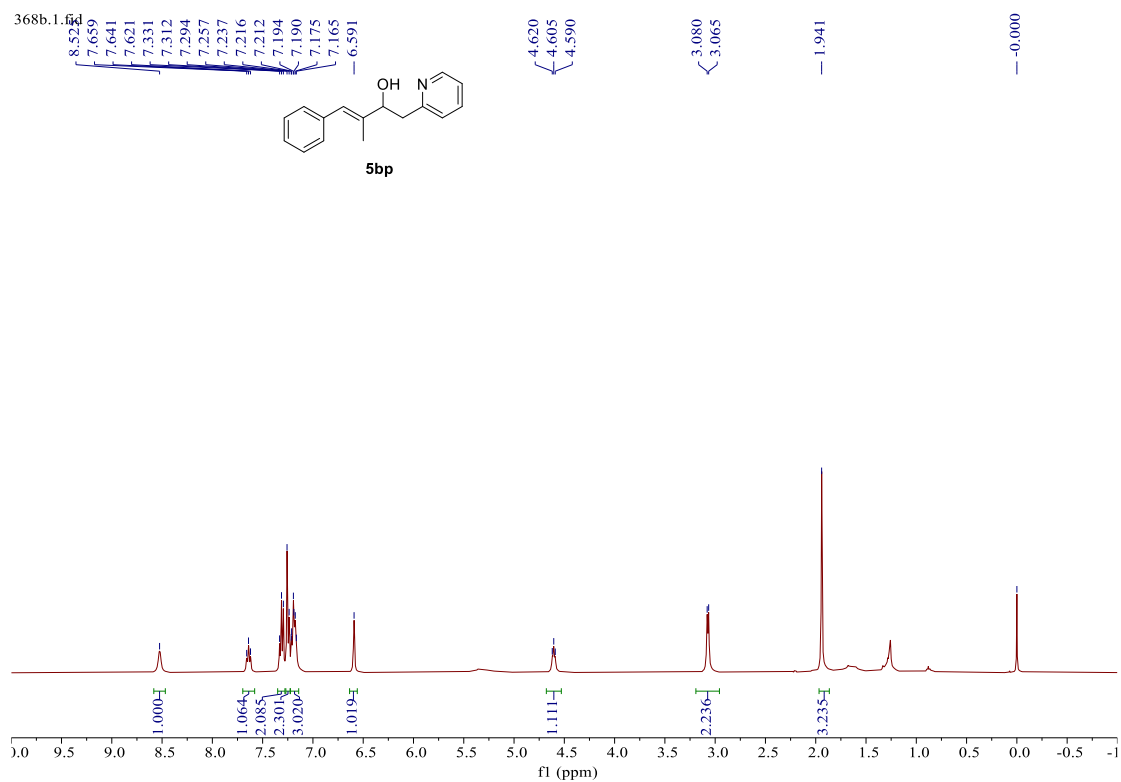

<sup>13</sup>C NMR (CDCl<sub>3</sub>) for **5bp**

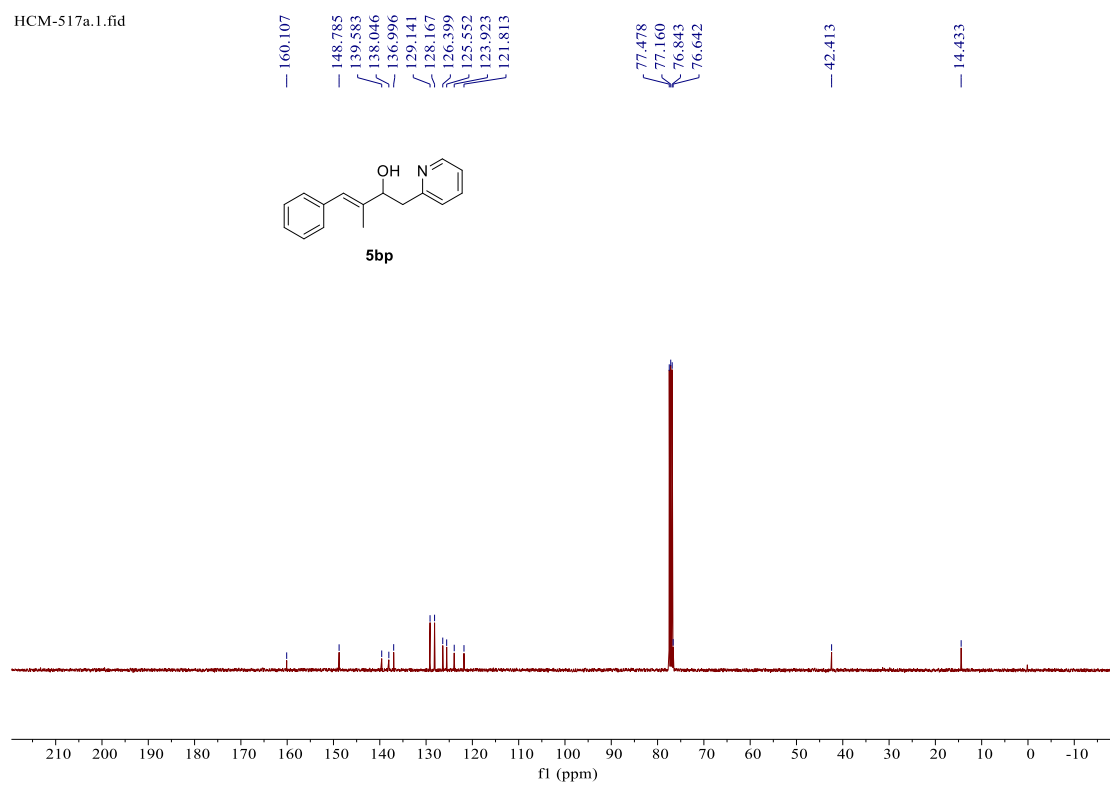

<sup>1</sup>H NMR (CDCl<sub>3</sub>) for **5q**

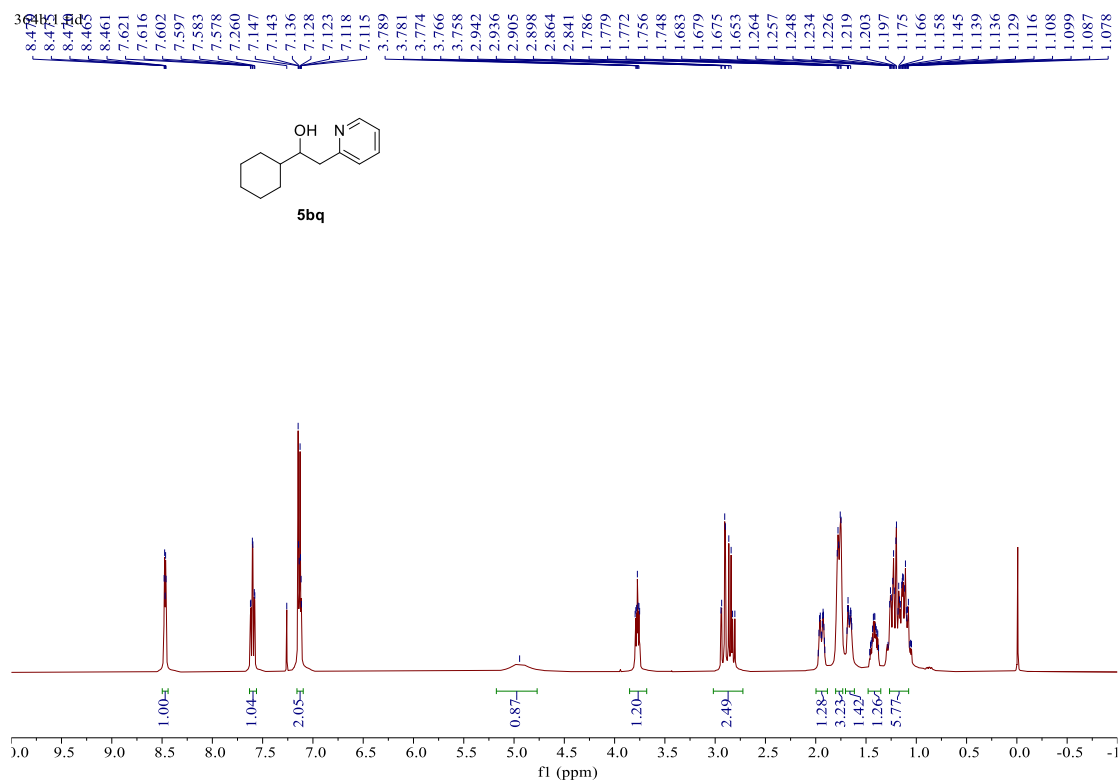

<sup>13</sup>C NMR (CDCl<sub>3</sub>) for **5q**

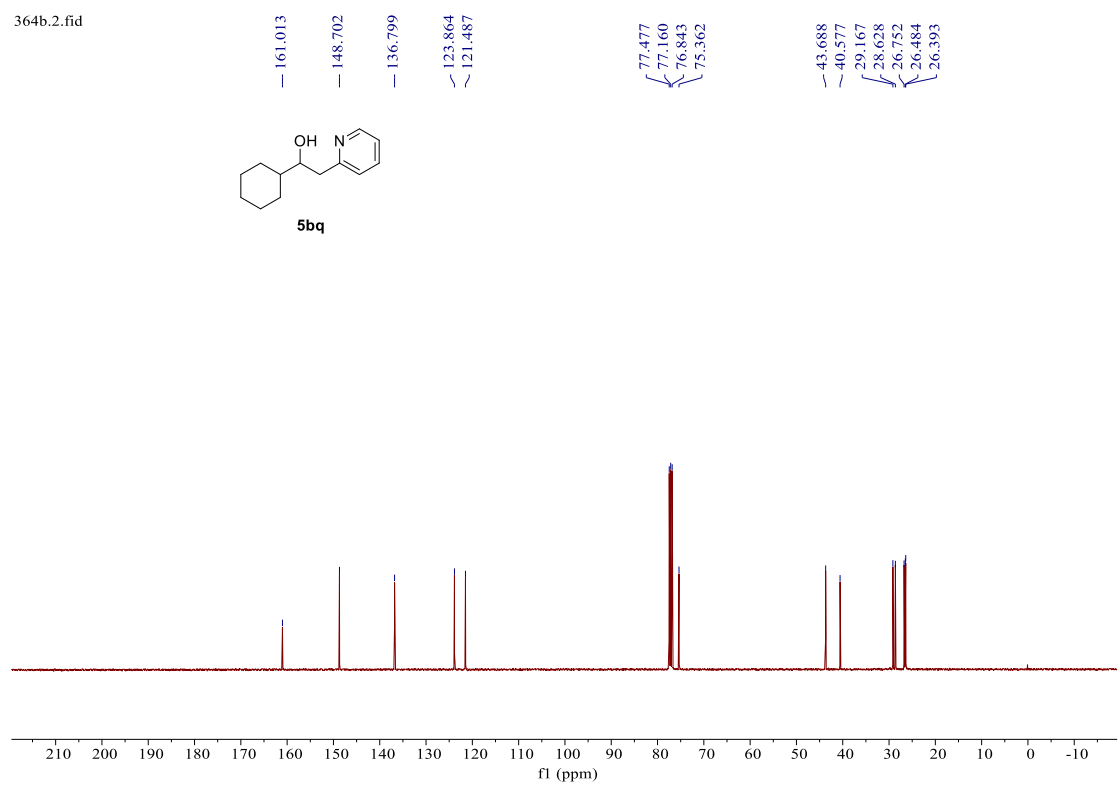

<sup>1</sup>H NMR (CDCl<sub>3</sub>) for **5br**

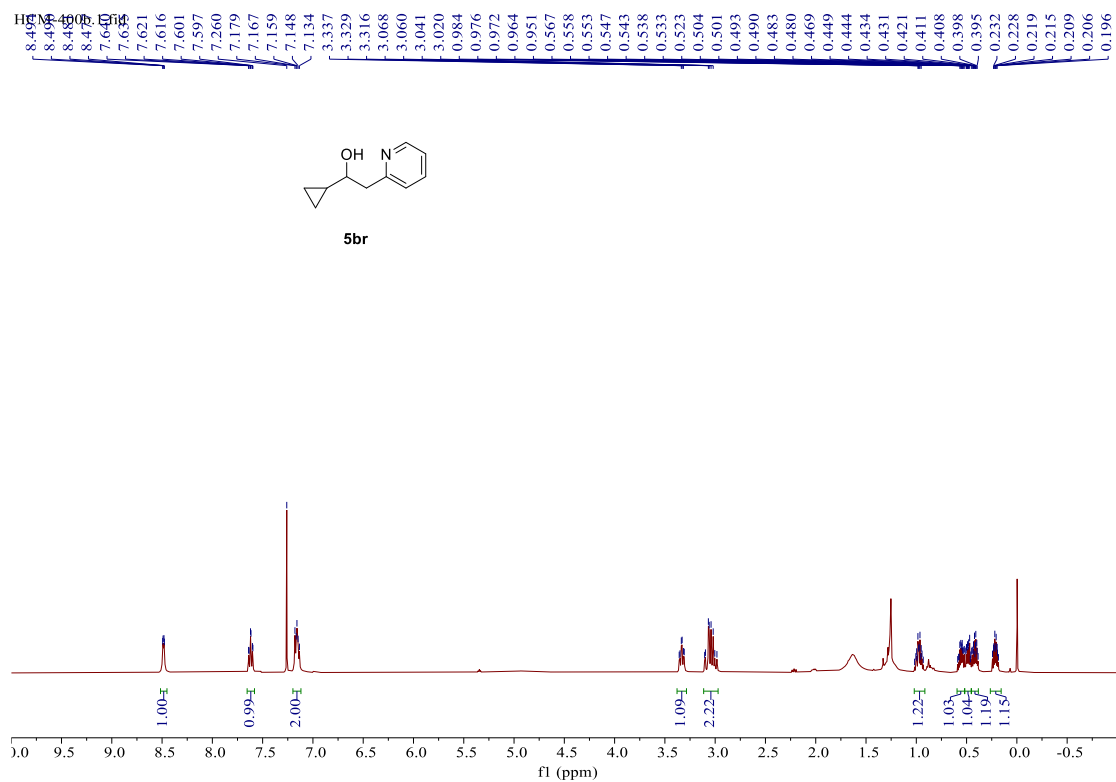

<sup>13</sup>C NMR (CDCl<sub>3</sub>) for **5br**

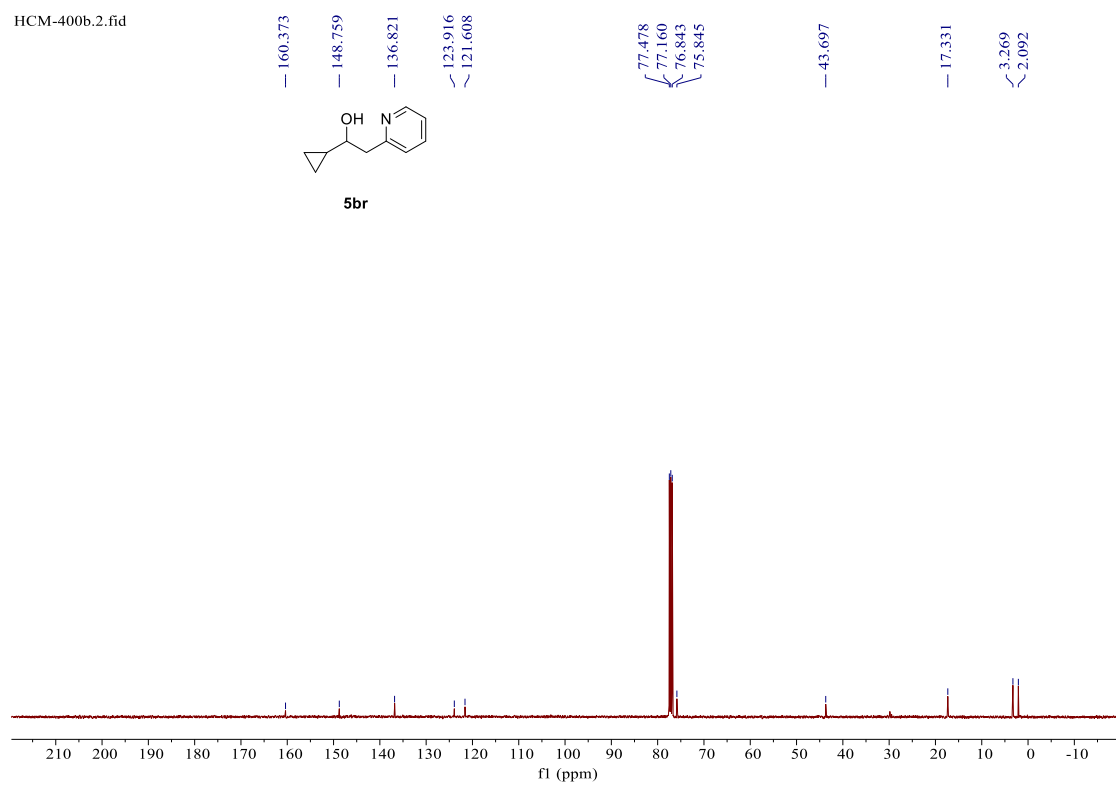

<sup>1</sup>H NMR (CDCl<sub>3</sub>) for **5bs**

HCM-50.1.fid

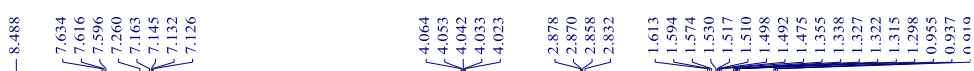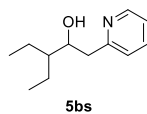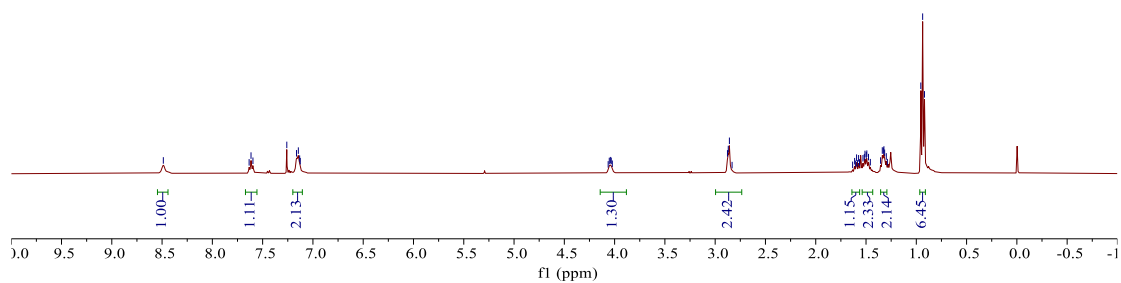

<sup>13</sup>C NMR (CDCl<sub>3</sub>) for **5bs**

HCM-412a.2.fid

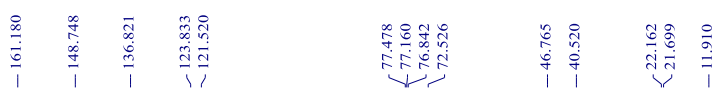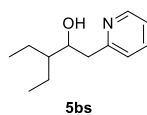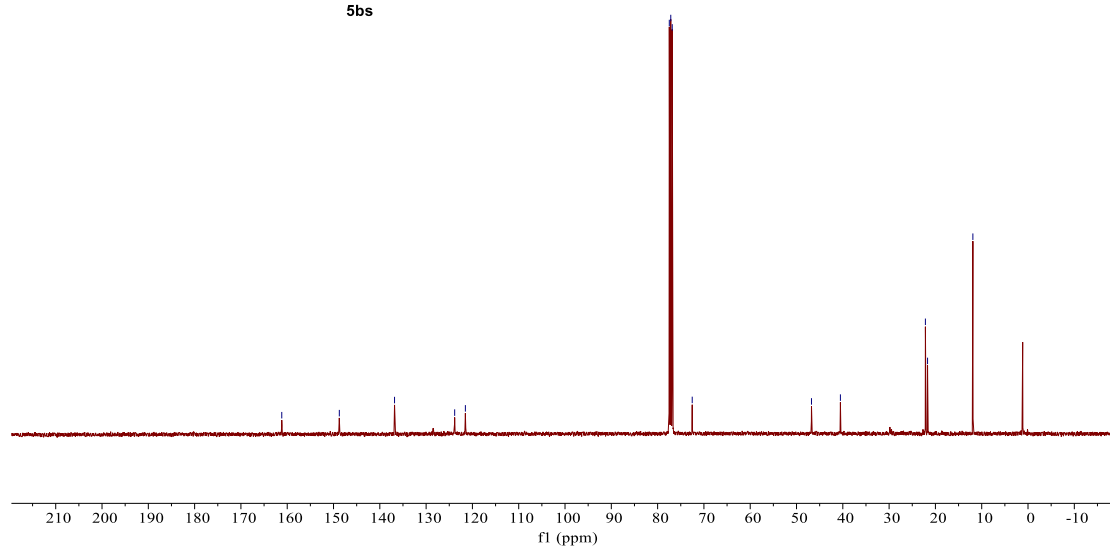

<sup>1</sup>H NMR (CDCl<sub>3</sub>) for **5bt**

HCM-1H.5.fid  
HCM-791d

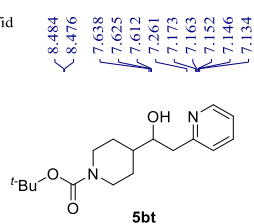

4.154  
3.822  
3.808  
3.795  
2.948  
2.923  
2.861  
2.846  
2.836  
2.821  
2.668  
1.926  
1.904  
1.734  
1.706  
1.683  
1.572  
1.559  
1.546  
1.455

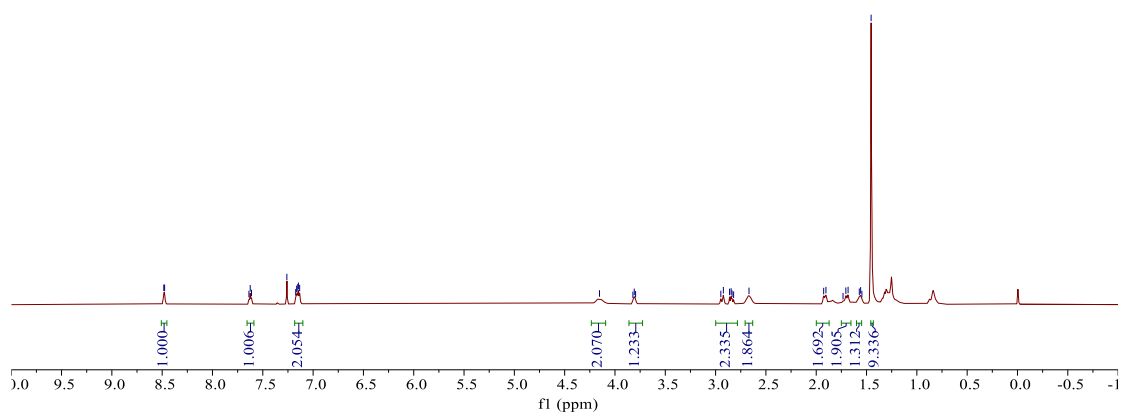

<sup>13</sup>C NMR (CDCl<sub>3</sub>) for **5bt**

HCM-13C.12.fid  
HCM-791D

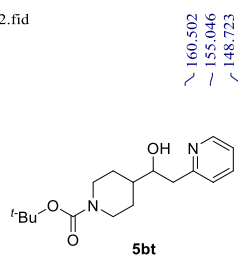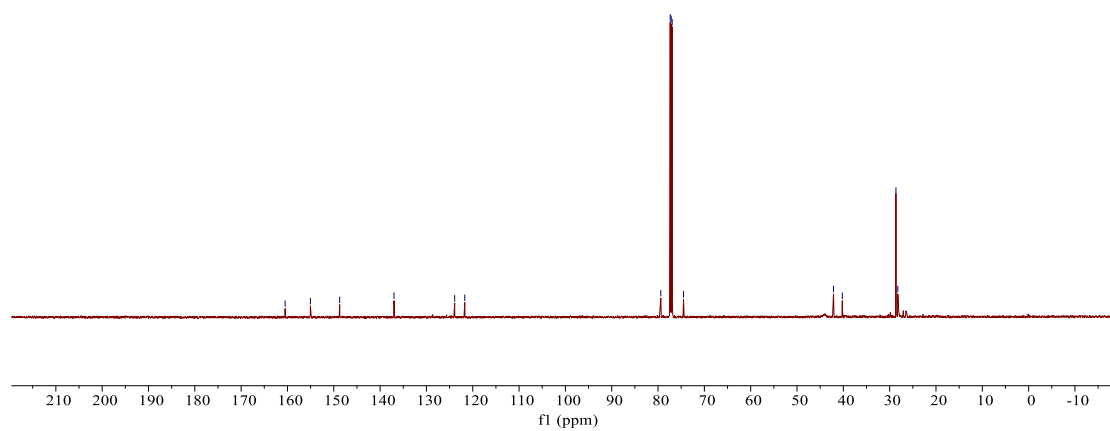

<sup>1</sup>H NMR (CDCl<sub>3</sub>) for **5bu**

HCM-1H.63.fid  
HCM-603A

8.510  
8.502  
7.629  
7.616  
7.604  
7.260  
7.159  
7.146  
7.132  
5.291  
5.277  
5.096  
5.085  
5.073  
4.852  
4.846  
4.838  
4.832  
4.823  
4.817  
2.989  
2.974  
2.964  
2.950  
2.898  
2.892  
2.872  
2.867  
2.122  
2.110  
2.098  
2.090  
2.087  
2.079  
2.068  
2.021  
2.008  
1.995  
1.680  
1.669  
1.598

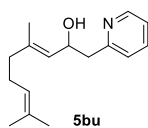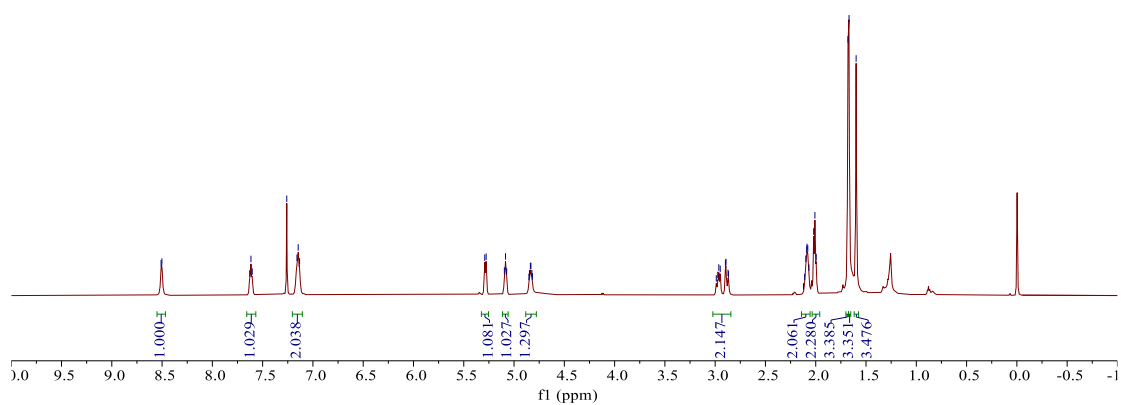

<sup>13</sup>C NMR (CDCl<sub>3</sub>) for **5bu**

HCM-13C.66.fid  
HCM-603a

160.252  
148.822  
138.242  
136.768  
131.707  
127.014  
124.218  
123.997  
121.636  
77.372  
77.160  
76.949  
68.242  
44.146  
39.687  
26.593  
25.813  
17.828  
16.768

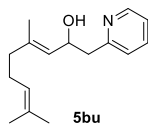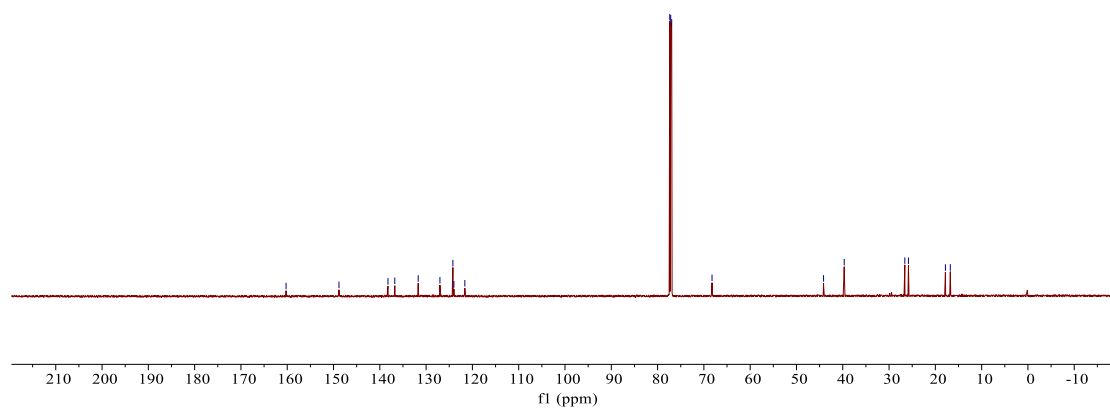



<sup>1</sup>H NMR (CDCl<sub>3</sub>) for **5bv**

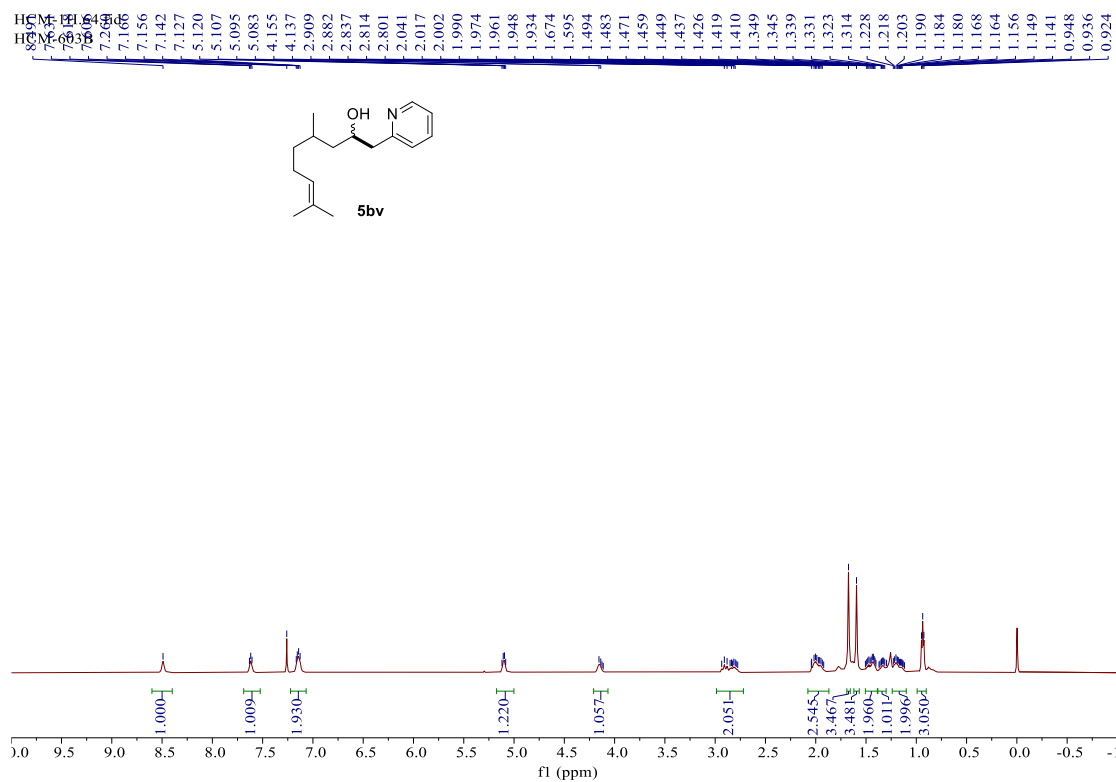

<sup>13</sup>C NMR (CDCl<sub>3</sub>) for **5bv**

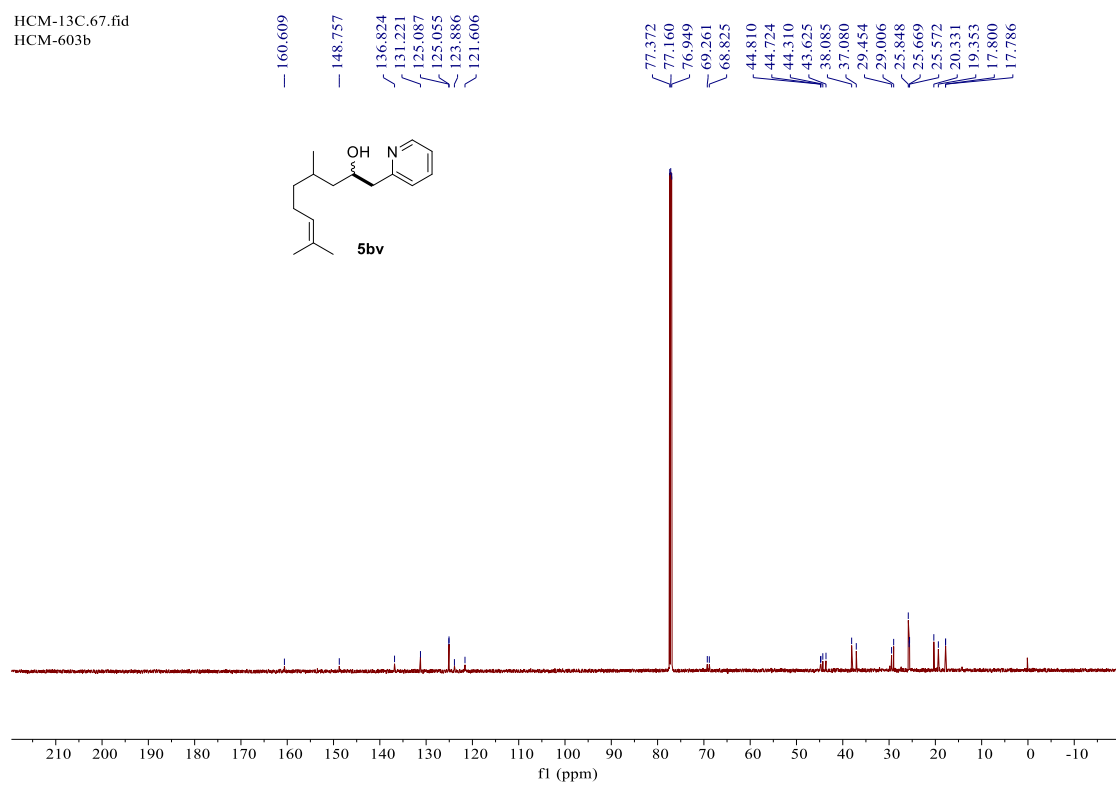

<sup>1</sup>H NMR (CDCl<sub>3</sub>) for **5bw**

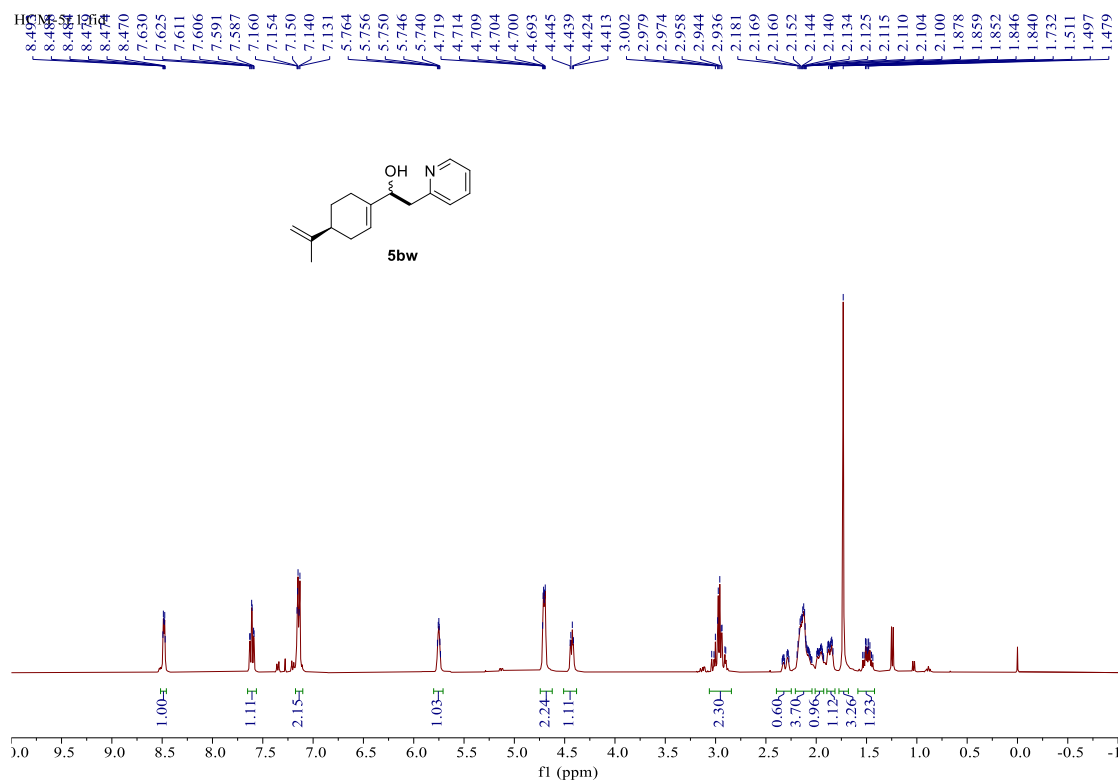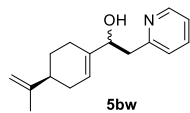

<sup>13</sup>C NMR (CDCl<sub>3</sub>) for **5bw**

HCM-517b.1.fid

160.481  
160.386  
150.090  
148.766  
148.748  
136.889  
136.864  
126.542  
126.004  
123.888  
123.848  
122.649  
121.869  
121.668  
108.708  
108.668  
77.478  
77.160  
76.843  
75.076  
74.956  
42.480  
42.456  
41.462  
41.379  
30.628  
30.572  
27.751  
27.721  
25.351  
24.709  
20.945  
20.912

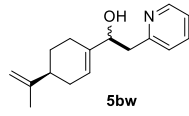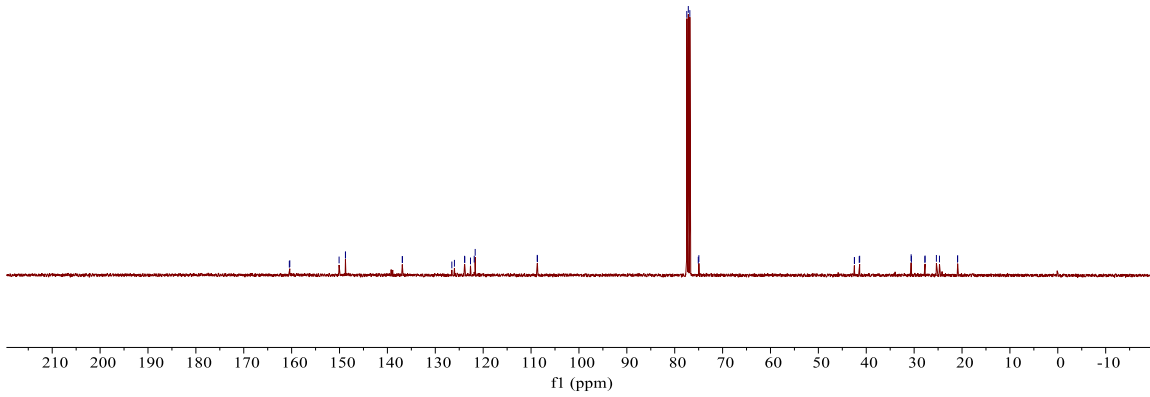

<sup>1</sup>H NMR (CDCl<sub>3</sub>) for **5bx**

HCM-517b.1.fid  
8.994  
8.978  
8.962  
8.946  
8.930  
8.914  
8.898  
8.882  
8.866  
8.850  
8.834  
8.818  
8.802  
8.786  
8.770  
8.754  
8.738  
8.722  
8.706  
8.690  
8.674  
8.658  
8.642  
8.626  
8.610  
8.594  
8.578  
8.562  
8.546  
8.530  
8.514  
8.498  
8.482  
8.466  
8.450  
8.434  
8.418  
8.402  
8.386  
8.370  
8.354  
8.338  
8.322  
8.306  
8.290  
8.274  
8.258  
8.242  
8.226  
8.210  
8.194  
8.178  
8.162  
8.146  
8.130  
8.114  
8.098  
8.082  
8.066  
8.050  
8.034  
8.018  
8.002  
7.986  
7.970  
7.954  
7.938  
7.922  
7.906  
7.890  
7.874  
7.858  
7.842  
7.826  
7.810  
7.794  
7.778  
7.762  
7.746  
7.730  
7.714  
7.698  
7.682  
7.666  
7.650  
7.634  
7.618  
7.602  
7.586  
7.570  
7.554  
7.538  
7.522  
7.506  
7.490  
7.474  
7.458  
7.442  
7.426  
7.410  
7.394  
7.378  
7.362  
7.346  
7.330  
7.314  
7.298  
7.282  
7.266  
7.250  
7.234  
7.218  
7.202  
7.186  
7.170  
7.154  
7.138  
7.122  
7.106  
7.090  
7.074  
7.058  
7.042  
7.026  
7.010  
6.994  
6.978  
6.962  
6.946  
6.930  
6.914  
6.898  
6.882  
6.866  
6.850  
6.834  
6.818  
6.802  
6.786  
6.770  
6.754  
6.738  
6.722  
6.706  
6.690  
6.674  
6.658  
6.642  
6.626  
6.610  
6.594  
6.578  
6.562  
6.546  
6.530  
6.514  
6.498  
6.482  
6.466  
6.450  
6.434  
6.418  
6.402  
6.386  
6.370  
6.354  
6.338  
6.322  
6.306  
6.290  
6.274  
6.258  
6.242  
6.226  
6.210  
6.194  
6.178  
6.162  
6.146  
6.130  
6.114  
6.098  
6.082  
6.066  
6.050  
6.034  
6.018  
6.002  
5.986  
5.970  
5.954  
5.938  
5.922  
5.906  
5.890  
5.874  
5.858  
5.842  
5.826  
5.810  
5.794  
5.778  
5.762  
5.746  
5.730  
5.714  
5.698  
5.682  
5.666  
5.650  
5.634  
5.618  
5.602  
5.586  
5.570  
5.554  
5.538  
5.522  
5.506  
5.490  
5.474  
5.458  
5.442  
5.426  
5.410  
5.394  
5.378  
5.362  
5.346  
5.330  
5.314  
5.298  
5.282  
5.266  
5.250  
5.234  
5.218  
5.202  
5.186  
5.170  
5.154  
5.138  
5.122  
5.106  
5.090  
5.074  
5.058  
5.042  
5.026  
5.010  
4.994  
4.978  
4.962  
4.946  
4.930  
4.914  
4.898  
4.882  
4.866  
4.850  
4.834  
4.818  
4.802  
4.786  
4.770  
4.754  
4.738  
4.722  
4.706  
4.690  
4.674  
4.658  
4.642  
4.626  
4.610  
4.594  
4.578  
4.562  
4.546  
4.530  
4.514  
4.498  
4.482  
4.466  
4.450  
4.434  
4.418  
4.402  
4.386  
4.370  
4.354  
4.338  
4.322  
4.306  
4.290  
4.274  
4.258  
4.242  
4.226  
4.210  
4.194  
4.178  
4.162  
4.146  
4.130  
4.114  
4.098  
4.082  
4.066  
4.050  
4.034  
4.018  
4.002  
3.986  
3.970  
3.954  
3.938  
3.922  
3.906  
3.890  
3.874  
3.858  
3.842  
3.826  
3.810  
3.794  
3.778  
3.762  
3.746  
3.730  
3.714  
3.698  
3.682  
3.666  
3.650  
3.634  
3.618  
3.602  
3.586  
3.570  
3.554  
3.538  
3.522  
3.506  
3.490  
3.474  
3.458  
3.442  
3.426  
3.410  
3.394  
3.378  
3.362  
3.346  
3.330  
3.314  
3.298  
3.282  
3.266  
3.250  
3.234  
3.218  
3.202  
3.186  
3.170  
3.154  
3.138  
3.122  
3.106  
3.090  
3.074  
3.058  
3.042  
3.026  
3.010  
2.994  
2.978  
2.962  
2.946  
2.930  
2.914  
2.898  
2.882  
2.866  
2.850  
2.834  
2.818  
2.802  
2.786  
2.770  
2.754  
2.738  
2.722  
2.706  
2.690  
2.674  
2.658  
2.642  
2.626  
2.610  
2.594  
2.578  
2.562  
2.546  
2.530  
2.514  
2.498  
2.482  
2.466  
2.450  
2.434  
2.418  
2.402  
2.386  
2.370  
2.354  
2.338  
2.322  
2.306  
2.290  
2.274  
2.258  
2.242  
2.226  
2.210  
2.194  
2.178  
2.162  
2.146  
2.130  
2.114  
2.098  
2.082  
2.066  
2.050  
2.034  
2.018  
2.002  
1.986  
1.970  
1.954  
1.938  
1.922  
1.906  
1.890  
1.874  
1.858  
1.842  
1.826  
1.810  
1.794  
1.778  
1.762  
1.746  
1.730  
1.714  
1.698  
1.682  
1.666  
1.650  
1.634  
1.618  
1.602  
1.586  
1.570  
1.554  
1.538  
1.522  
1.506  
1.490  
1.474  
1.458  
1.442  
1.426  
1.410  
1.394  
1.378  
1.362  
1.346  
1.330  
1.314  
1.298  
1.282  
1.266  
1.250  
1.234  
1.218  
1.202  
1.186  
1.170  
1.154  
1.138  
1.122  
1.106  
1.090  
1.074  
1.058  
1.042  
1.026  
1.010  
1.000

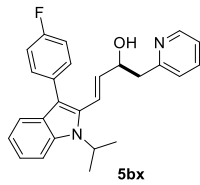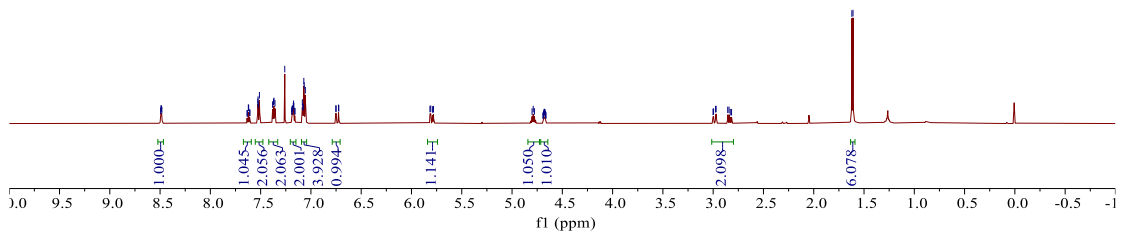

<sup>13</sup>C NMR (CDCl<sub>3</sub>) for **5bx**

HCM-13C.71.fid  
HCM-618

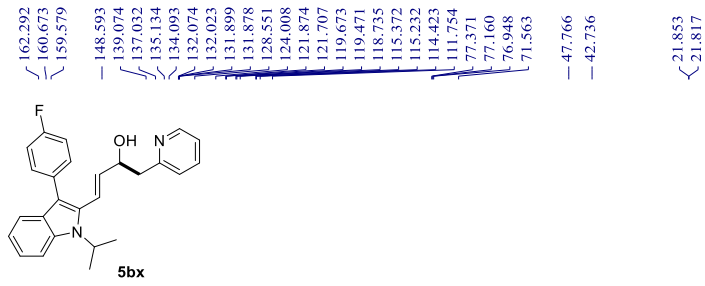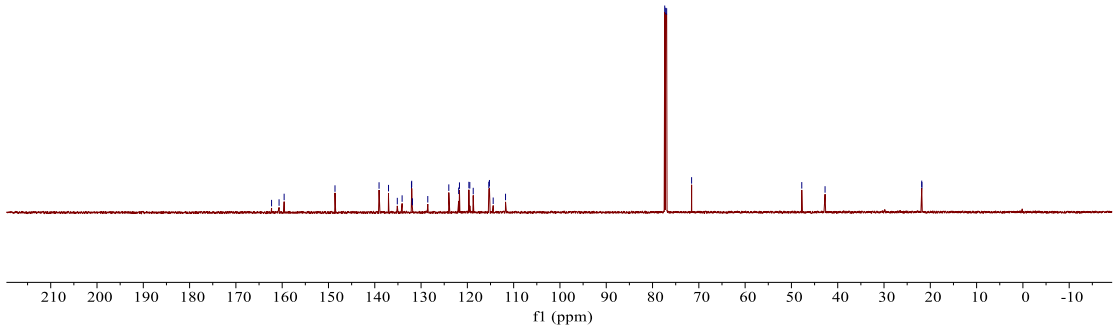

<sup>19</sup>F NMR (CDCl<sub>3</sub>) for **5bx**

HCM-606d.1.fid

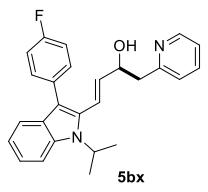

-117.167

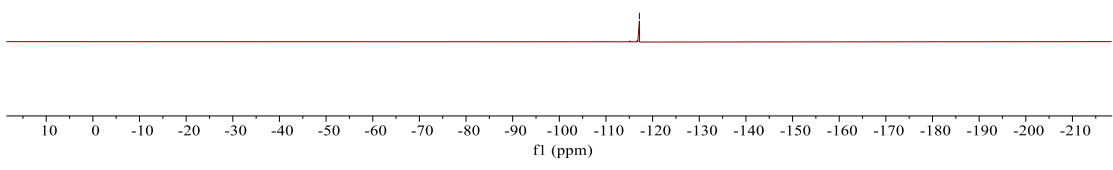

<sup>1</sup>H NMR (CDCl<sub>3</sub>) for **5by**

HCM-1H.67.fid  
HCM-610a

|       |       |       |       |       |       |       |       |       |       |       |       |       |       |       |       |       |       |       |       |       |       |       |       |       |       |       |       |       |       |       |       |       |       |       |       |       |       |       |       |       |       |       |       |       |       |       |       |       |       |
|-------|-------|-------|-------|-------|-------|-------|-------|-------|-------|-------|-------|-------|-------|-------|-------|-------|-------|-------|-------|-------|-------|-------|-------|-------|-------|-------|-------|-------|-------|-------|-------|-------|-------|-------|-------|-------|-------|-------|-------|-------|-------|-------|-------|-------|-------|-------|-------|-------|-------|
| 8.585 | 8.577 | 8.233 | 8.150 | 8.137 | 7.638 | 7.626 | 7.623 | 7.617 | 7.605 | 7.593 | 7.572 | 7.560 | 7.484 | 7.476 | 7.470 | 7.467 | 7.463 | 7.453 | 7.418 | 7.409 | 7.405 | 7.399 | 7.393 | 7.385 | 7.378 | 7.295 | 7.291 | 7.286 | 7.282 | 7.278 | 7.270 | 7.208 | 7.200 | 7.195 | 7.187 | 7.155 | 7.142 | 5.392 | 5.387 | 5.376 | 5.371 | 5.321 | 3.306 | 3.296 | 3.281 | 3.240 | 3.235 | 3.215 | 3.210 |
|-------|-------|-------|-------|-------|-------|-------|-------|-------|-------|-------|-------|-------|-------|-------|-------|-------|-------|-------|-------|-------|-------|-------|-------|-------|-------|-------|-------|-------|-------|-------|-------|-------|-------|-------|-------|-------|-------|-------|-------|-------|-------|-------|-------|-------|-------|-------|-------|-------|-------|

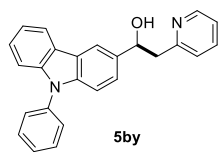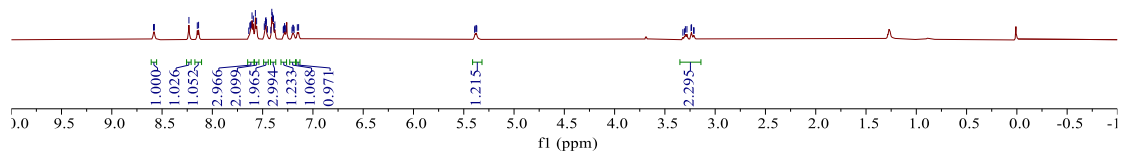

<sup>13</sup>C NMR (CDCl<sub>3</sub>) for **5by**

HCM-13C.68.fid  
HCM-610A

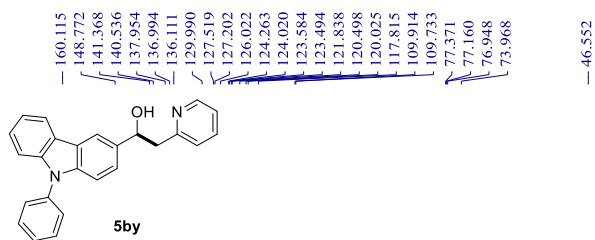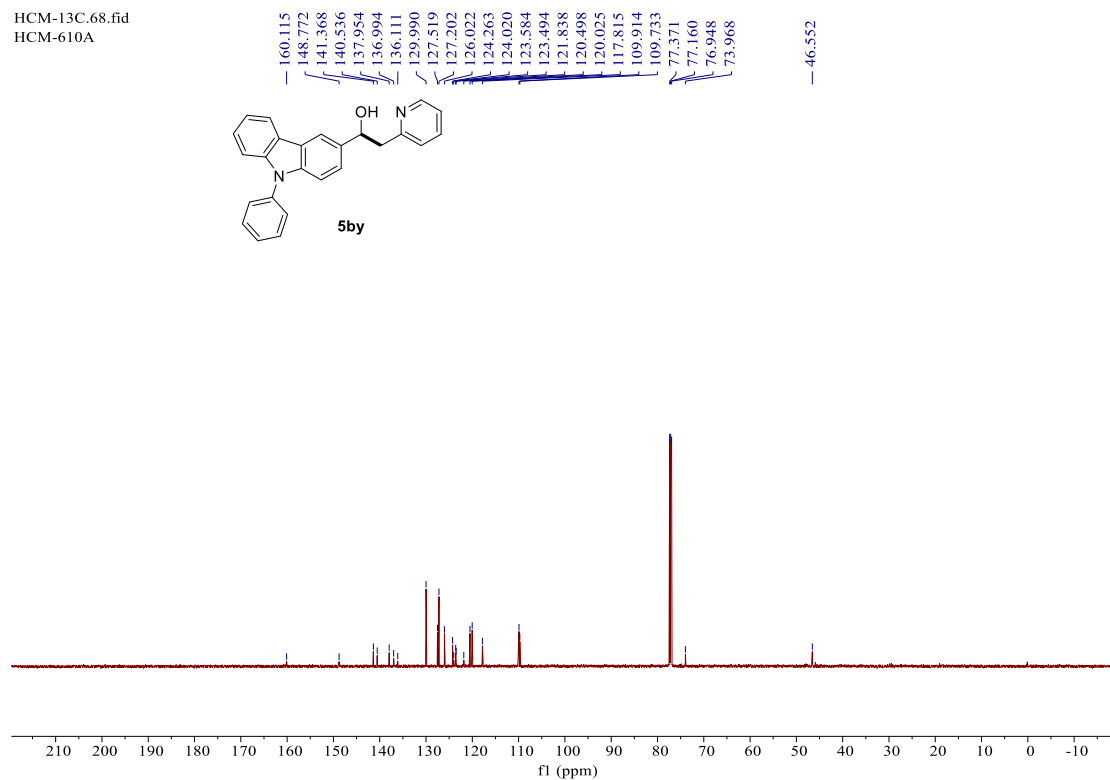

<sup>1</sup>H NMR (CDCl<sub>3</sub>) for **5bz**

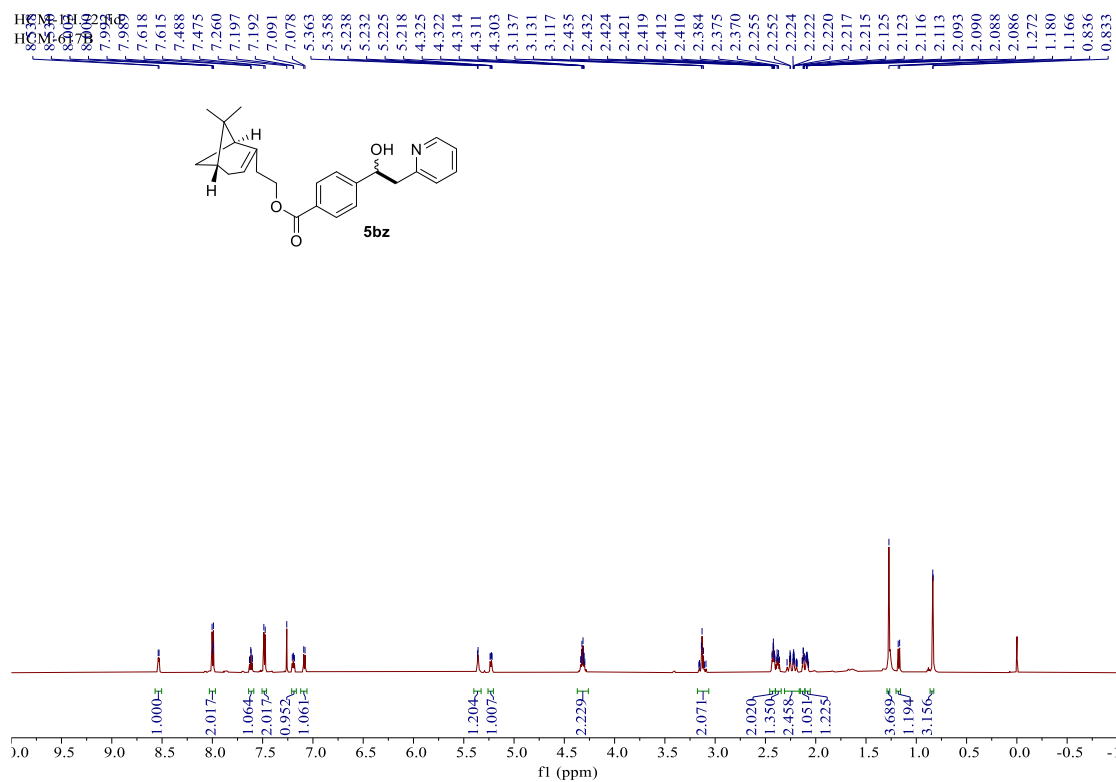

<sup>13</sup>C NMR (CDCl<sub>3</sub>) for **5bz**

HCM-13C.70.fid  
HCM-617B

166.650  
159.516  
149.269  
148.691  
144.447  
137.148  
129.799  
129.541  
125.879  
123.963  
122.030  
119.051  
77.372  
77.160  
76.948  
73.096  
63.414  
45.969  
45.337  
40.919  
38.173  
36.230  
31.840  
31.545  
26.423  
21.299

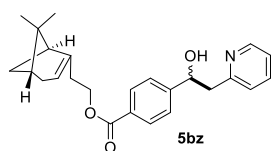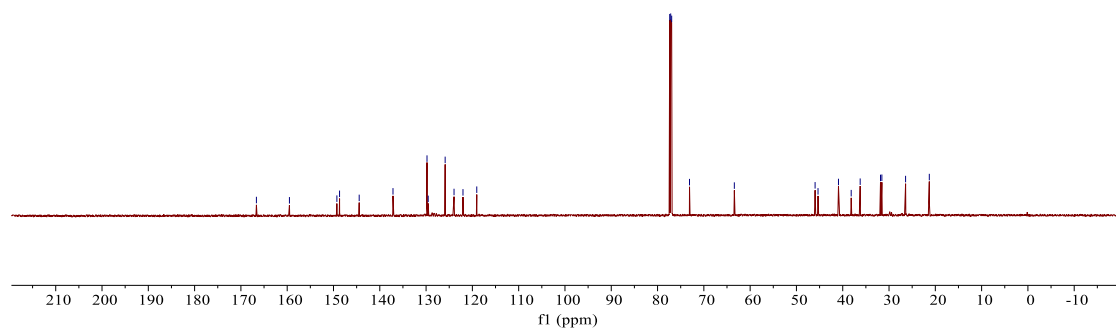

<sup>1</sup>H NMR (CDCl<sub>3</sub>) for **5ga**

8.098  
8.081  
8.067  
7.817  
7.816  
7.744  
7.742  
7.733  
7.730  
7.727  
7.718  
7.716  
7.550  
7.548  
7.536  
7.525  
7.523  
7.496  
7.494  
7.482  
7.382  
7.369  
7.356  
7.299  
7.297  
7.295  
7.285  
7.275  
7.272  
7.270  
7.260  
7.234  
7.220  
6.164  
5.349  
5.343  
5.335  
5.329  
3.364  
3.349  
3.338  
3.322  
3.315  
3.295  
3.289

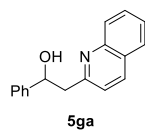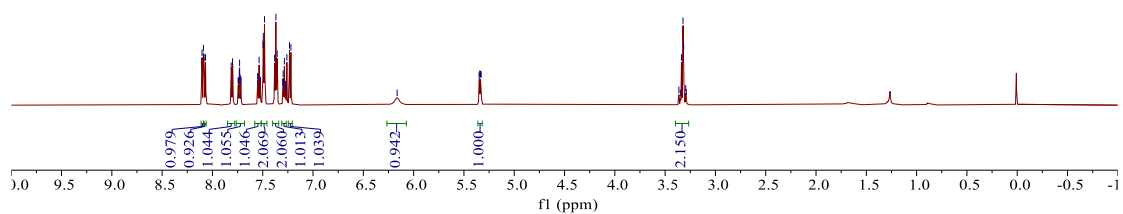

<sup>13</sup>C NMR (CDCl<sub>3</sub>) for **5ga**

HCM-13C.73.fid  
HCM-628A

160.707  
147.231  
144.140  
136.963  
129.972  
128.905  
128.508  
127.739  
127.451  
127.034  
126.383  
126.044  
122.236

77.371  
77.160  
76.948  
73.121

46.295

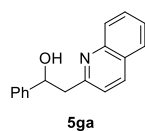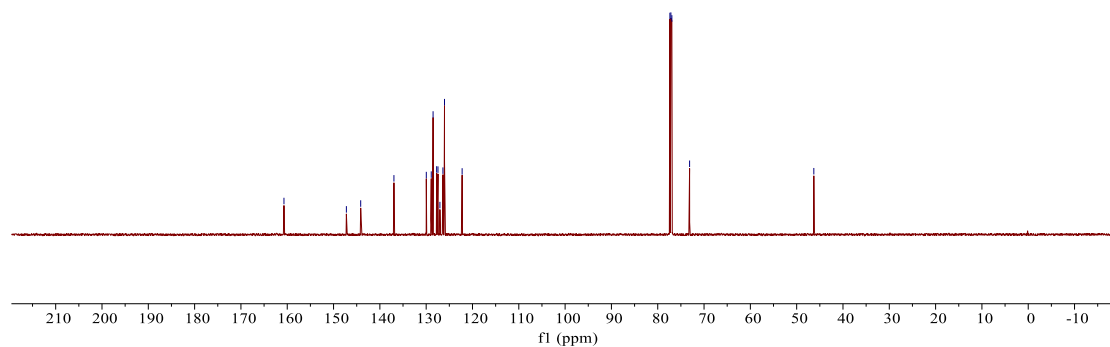

<sup>1</sup>H NMR (CDCl<sub>3</sub>) for **5ha**

HCM-1H.78.fid  
HCM-628D

|        |       |       |       |       |       |       |       |       |       |       |       |       |       |       |       |       |       |       |       |       |       |       |       |       |       |       |       |       |       |       |       |       |       |       |       |       |       |       |
|--------|-------|-------|-------|-------|-------|-------|-------|-------|-------|-------|-------|-------|-------|-------|-------|-------|-------|-------|-------|-------|-------|-------|-------|-------|-------|-------|-------|-------|-------|-------|-------|-------|-------|-------|-------|-------|-------|-------|
| 8.5389 | 8.385 | 7.463 | 7.459 | 7.450 | 7.446 | 7.437 | 7.425 | 7.357 | 7.345 | 7.332 | 7.275 | 7.273 | 7.271 | 7.260 | 7.251 | 7.249 | 7.246 | 7.038 | 7.025 | 5.152 | 5.145 | 5.138 | 5.131 | 3.127 | 3.114 | 3.102 | 3.092 | 3.088 | 3.085 | 3.067 | 3.060 | 2.666 | 2.653 | 2.640 | 2.628 | 1.269 | 1.256 | 1.243 |
|--------|-------|-------|-------|-------|-------|-------|-------|-------|-------|-------|-------|-------|-------|-------|-------|-------|-------|-------|-------|-------|-------|-------|-------|-------|-------|-------|-------|-------|-------|-------|-------|-------|-------|-------|-------|-------|-------|-------|

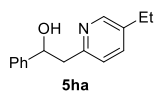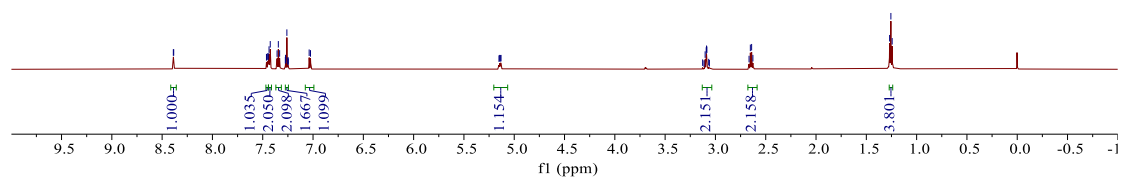

<sup>13</sup>C NMR (CDCl<sub>3</sub>) for **5ha**

HCM-13C.72.fid  
HCM-628D

|         |         |         |         |         |         |         |         |         |        |        |        |        |        |        |        |
|---------|---------|---------|---------|---------|---------|---------|---------|---------|--------|--------|--------|--------|--------|--------|--------|
| 157.175 | 148.314 | 144.349 | 137.422 | 136.457 | 128.444 | 127.377 | 126.006 | 123.505 | 77.371 | 77.160 | 76.948 | 73.622 | 45.369 | 25.880 | 15.441 |
|---------|---------|---------|---------|---------|---------|---------|---------|---------|--------|--------|--------|--------|--------|--------|--------|

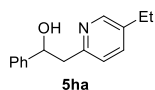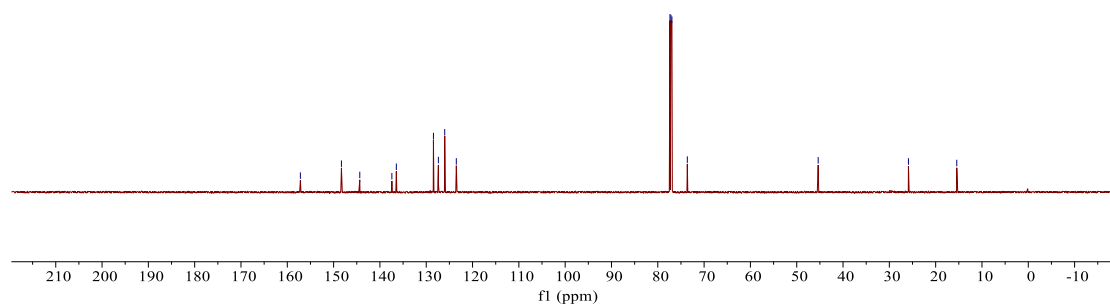



<sup>1</sup>H NMR (CDCl<sub>3</sub>) for **5ia**

HCM-417976d  
HCM-628e2  
7.447  
7.444  
7.441  
7.349  
7.338  
7.336  
7.276  
7.273  
7.271  
7.260  
7.251  
7.249  
7.247  
6.873  
6.744  
5.115  
5.110  
5.100  
5.095  
3.036  
3.021  
3.014  
3.009  
2.516  
2.275

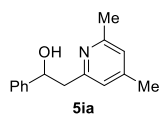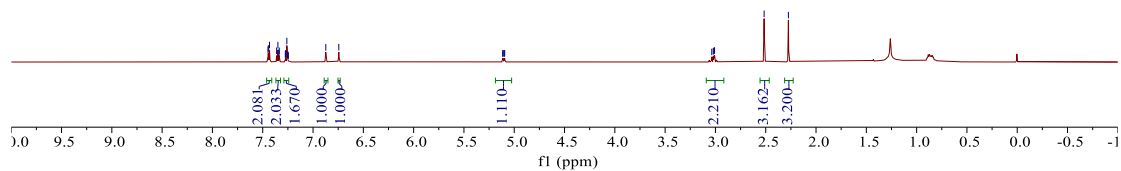

<sup>13</sup>C NMR (CDCl<sub>3</sub>) for **5ia**

HCM-13C.74.fid  
HCM-628e2  
159.106  
157.244  
148.474  
144.518  
128.417  
127.295  
126.003  
122.382  
121.706  
77.371  
77.160  
76.948  
73.572  
45.388  
24.277  
21.044

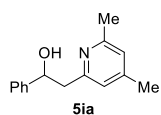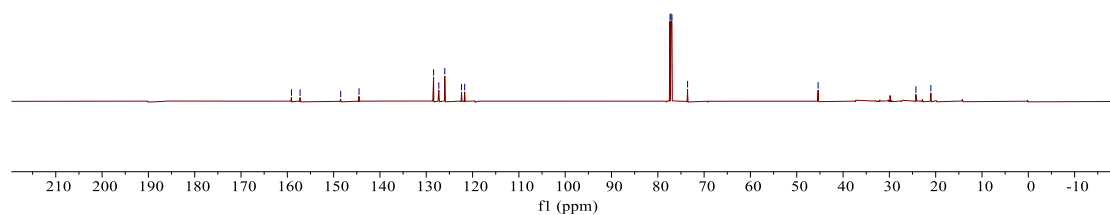

<sup>1</sup>H NMR (CDCl<sub>3</sub>) for **5ja**

HCM-1H.82.fid  
HCM-635

8.462  
8.454  
7.562  
7.549  
7.337  
7.325  
7.312  
7.297  
7.286  
7.260  
7.100  
7.092

4.949  
4.940  
4.935  
4.927

3.069  
3.055  
3.045  
3.032  
3.014  
3.005  
2.991  
2.982

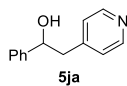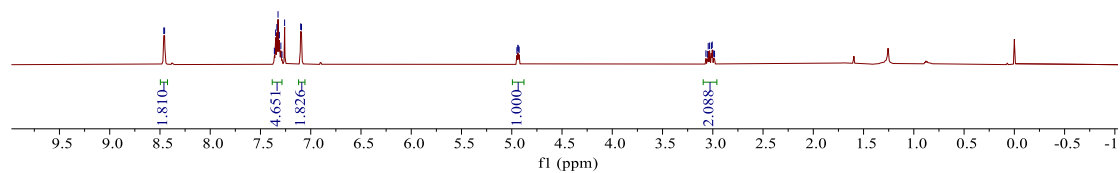

<sup>13</sup>C NMR (CDCl<sub>3</sub>) for **5ja**

HCM-13C.86.fid  
HCM-635

149.681  
147.522  
143.658

128.709  
128.082  
126.905  
125.068

77.372  
77.161  
76.949  
74.665

45.249

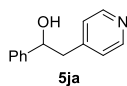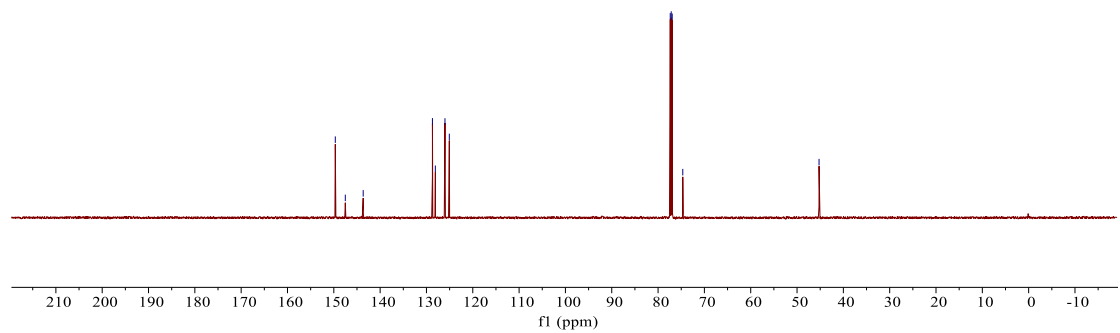

## IX. The HRMS for the mixture of mechanism studies (experiment c)

### Mass Spectrum List Report

#### Analysis Info

Analysis Name D:\Data\2021\guanzhi\20211118\D212.d  
 Method DirectInfusion - MS - positive.m  
 Sample Name  
 Comment

Acquisition Date 11/18/2021 10:16:41 AM

Operator Demo User  
 Instrument impact II 1825265.10221

#### Acquisition Parameter

|             |            |                      |          |                  |           |
|-------------|------------|----------------------|----------|------------------|-----------|
| Source Type | ESI        | Ion Polarity         | Positive | Set Nebulizer    | 0.4 Bar   |
| Focus       | Not active | Set Capillary        | 4500 V   | Set Dry Heater   | 180 °C    |
| Scan Begin  | 50 m/z     | Set End Plate Offset | -500 V   | Set Dry Gas      | 4.0 l/min |
| Scan End    | 1300 m/z   | Set Charging Voltage | 2000 V   | Set Divert Valve | Source    |
|             |            | Set Corona           | 0 nA     | Set APCI Heater  | 0 °C      |

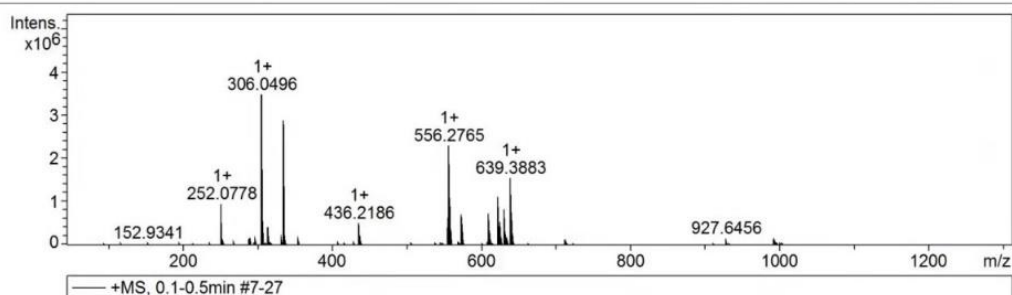

| #  | m/z      | Res.  | S/N    | I     | I % | FWHM   |
|----|----------|-------|--------|-------|-----|--------|
| 1  | 94.0643  | 17759 | 2004.0 | 15582 | 0.4 | 0.0053 |
| 2  | 94.9287  | 17428 | 6127.8 | 47774 | 1.4 | 0.0054 |
| 3  | 96.9264  | 16691 | 1113.9 | 8749  | 0.3 | 0.0058 |
| 4  | 104.9624 | 19350 | 241.4  | 1928  | 0.1 | 0.0054 |
| 5  | 108.9443 | 19537 | 798.5  | 6467  | 0.2 | 0.0056 |
| 6  | 112.0150 | 19409 | 262.6  | 2143  | 0.1 | 0.0058 |
| 7  | 112.8947 | 19839 | 537.3  | 4394  | 0.1 | 0.0057 |
| 8  | 114.8921 | 19318 | 242.0  | 1990  | 0.1 | 0.0059 |
| 9  | 116.9762 | 19304 | 6419.0 | 53132 | 1.5 | 0.0061 |
| 10 | 118.9740 | 14961 | 748.7  | 6233  | 0.2 | 0.0080 |
| 11 | 132.9038 | 22159 | 221.9  | 1954  | 0.1 | 0.0060 |
| 12 | 136.9602 | 20588 | 808.3  | 7262  | 0.2 | 0.0067 |
| 13 | 136.9885 | 20134 | 370.0  | 3325  | 0.1 | 0.0068 |
| 14 | 138.9184 | 20396 | 415.3  | 3766  | 0.1 | 0.0068 |
| 15 | 143.0457 | 20408 | 364.4  | 3406  | 0.1 | 0.0070 |
| 16 | 150.1269 | 21694 | 307.0  | 2990  | 0.1 | 0.0069 |
| 17 | 150.8950 | 22602 | 591.7  | 5775  | 0.2 | 0.0067 |
| 18 | 152.9341 | 21780 | 5855.0 | 57512 | 1.7 | 0.0070 |
| 19 | 154.9323 | 20392 | 820.9  | 8181  | 0.2 | 0.0076 |
| 20 | 159.0197 | 21777 | 236.3  | 2450  | 0.1 | 0.0073 |
| 21 | 171.0408 | 23084 | 204.1  | 2298  | 0.1 | 0.0074 |
| 22 | 176.8744 | 22243 | 790.2  | 9446  | 0.3 | 0.0080 |
| 23 | 178.8724 | 21722 | 169.9  | 2071  | 0.1 | 0.0082 |
| 24 | 196.1112 | 23502 | 3717.6 | 50808 | 1.5 | 0.0083 |
| 25 | 197.1145 | 22761 | 569.0  | 7801  | 0.2 | 0.0087 |
| 26 | 206.8616 | 24010 | 124.5  | 1884  | 0.1 | 0.0086 |
| 27 | 208.9006 | 23843 | 755.8  | 11938 | 0.3 | 0.0088 |
| 28 | 210.8984 | 19834 | 212.4  | 3439  | 0.1 | 0.0106 |
| 29 | 212.8416 | 22813 | 122.5  | 2011  | 0.1 | 0.0093 |
| 30 | 214.1218 | 23305 | 1697.6 | 28032 | 0.8 | 0.0092 |
| 31 | 215.1251 | 23561 | 271.4  | 4503  | 0.1 | 0.0091 |
| 32 | 221.0355 | 24802 | 150.8  | 2683  | 0.1 | 0.0089 |
| 33 | 226.8778 | 24482 | 460.3  | 9328  | 0.3 | 0.0093 |

## Mass Spectrum List Report

| #  | m/z      | Res.  | S/N     | I       | I %   | FWHM   |
|----|----------|-------|---------|---------|-------|--------|
| 34 | 228.8749 | 20105 | 86.0    | 1810    | 0.1   | 0.0114 |
| 35 | 234.0672 | 24095 | 198.6   | 4470    | 0.1   | 0.0097 |
| 36 | 236.1038 | 24142 | 2825.1  | 64834   | 1.9   | 0.0098 |
| 37 | 237.1071 | 23923 | 420.2   | 9760    | 0.3   | 0.0099 |
| 38 | 238.0291 | 24360 | 338.5   | 7887    | 0.2   | 0.0098 |
| 39 | 242.2835 | 24726 | 824.8   | 19718   | 0.6   | 0.0098 |
| 40 | 243.2868 | 23689 | 146.0   | 3530    | 0.1   | 0.0103 |
| 41 | 248.8932 | 25089 | 76.6    | 1915    | 0.1   | 0.0099 |
| 42 | 250.9322 | 25174 | 111.5   | 2808    | 0.1   | 0.0100 |
| 43 | 252.0778 | 23413 | 37852.8 | 955643  | 27.5  | 0.0108 |
| 44 | 252.8905 | 20075 | 83.8    | 2113    | 0.1   | 0.0126 |
| 45 | 253.0811 | 23212 | 5797.0  | 146236  | 4.2   | 0.0109 |
| 46 | 254.0766 | 21400 | 2883.1  | 72692   | 2.1   | 0.0119 |
| 47 | 254.1128 | 13945 | 128.2   | 3232    | 0.1   | 0.0182 |
| 48 | 255.0794 | 23283 | 444.6   | 11210   | 0.3   | 0.0110 |
| 49 | 263.0574 | 25446 | 159.6   | 4218    | 0.1   | 0.0103 |
| 50 | 264.8672 | 25361 | 253.6   | 6895    | 0.2   | 0.0104 |
| 51 | 265.0729 | 23941 | 176.4   | 4823    | 0.1   | 0.0111 |
| 52 | 266.8648 | 22027 | 93.4    | 2645    | 0.1   | 0.0121 |
| 53 | 266.9062 | 25561 | 323.2   | 9157    | 0.3   | 0.0104 |
| 54 | 268.0937 | 25402 | 2536.9  | 73304   | 2.1   | 0.0106 |
| 55 | 268.9046 | 23605 | 71.6    | 2087    | 0.1   | 0.0114 |
| 56 | 269.0969 | 25208 | 386.4   | 11265   | 0.3   | 0.0107 |
| 57 | 279.1715 | 25205 | 166.2   | 5076    | 0.1   | 0.0111 |
| 58 | 281.2385 | 25437 | 76.1    | 2368    | 0.1   | 0.0111 |
| 59 | 282.8408 | 16544 | 60.6    | 1930    | 0.1   | 0.0171 |
| 60 | 290.0757 | 24868 | 4229.4  | 148394  | 4.3   | 0.0117 |
| 61 | 291.0789 | 24292 | 660.3   | 23241   | 0.7   | 0.0120 |
| 62 | 292.0805 | 20265 | 68.2    | 2414    | 0.1   | 0.0144 |
| 63 | 295.2542 | 25044 | 85.0    | 3123    | 0.1   | 0.0118 |
| 64 | 296.2496 | 25929 | 810.2   | 30111   | 0.9   | 0.0114 |
| 65 | 297.2335 | 24924 | 2650.0  | 98992   | 2.8   | 0.0119 |
| 66 | 298.2370 | 25111 | 521.9   | 19582   | 0.6   | 0.0119 |
| 67 | 299.0648 | 26174 | 497.7   | 18729   | 0.5   | 0.0114 |
| 68 | 299.2401 | 24884 | 52.2    | 1963    | 0.1   | 0.0120 |
| 69 | 300.0681 | 27316 | 96.3    | 3639    | 0.1   | 0.0110 |
| 70 | 305.8647 | 27673 | 75.9    | 3096    | 0.1   | 0.0111 |
| 71 | 305.9921 | 8951  | 122.0   | 4980    | 0.1   | 0.0342 |
| 72 | 306.0496 | 23978 | 85214.6 | 3481012 | 100.0 | 0.0128 |
| 73 | 306.1086 | 15072 | 401.7   | 16415   | 0.5   | 0.0203 |
| 74 | 306.1279 | 10067 | 315.3   | 12883   | 0.4   | 0.0304 |
| 75 | 306.1742 | 27687 | 165.4   | 6756    | 0.2   | 0.0111 |
| 76 | 306.1968 | 25152 | 1395.7  | 57027   | 1.6   | 0.0122 |
| 77 | 306.8989 | 18858 | 98.7    | 4066    | 0.1   | 0.0163 |
| 78 | 307.0530 | 24349 | 13433.0 | 553977  | 15.9  | 0.0126 |
| 79 | 307.1652 | 9794  | 61.9    | 2555    | 0.1   | 0.0314 |
| 80 | 307.1934 | 10552 | 53.8    | 2221    | 0.1   | 0.0291 |
| 81 | 308.0486 | 21806 | 6451.8  | 267929  | 7.7   | 0.0141 |
| 82 | 308.0851 | 20416 | 661.6   | 27475   | 0.8   | 0.0151 |
| 83 | 308.1398 | 16896 | 119.8   | 4976    | 0.1   | 0.0182 |
| 84 | 309.0513 | 24098 | 975.0   | 40581   | 1.2   | 0.0128 |
| 85 | 309.0887 | 19847 | 119.2   | 4963    | 0.1   | 0.0156 |
| 86 | 310.0540 | 23820 | 83.1    | 3463    | 0.1   | 0.0130 |
| 87 | 311.2492 | 26645 | 1018.3  | 42918   | 1.2   | 0.0117 |
| 88 | 312.2524 | 25230 | 211.3   | 8999    | 0.3   | 0.0124 |
| 89 | 315.0388 | 25024 | 9775.6  | 419497  | 12.1  | 0.0126 |
| 90 | 316.0421 | 26075 | 1697.7  | 72965   | 2.1   | 0.0121 |
| 91 | 317.0379 | 21824 | 752.3   | 32379   | 0.9   | 0.0145 |
| 92 | 317.0748 | 24673 | 191.4   | 8239    | 0.2   | 0.0129 |
| 93 | 317.1141 | 22104 | 61.5    | 2648    | 0.1   | 0.0143 |
| 94 | 318.0407 | 24865 | 132.2   | 5690    | 0.2   | 0.0128 |
| 95 | 319.1664 | 25275 | 49.7    | 2148    | 0.1   | 0.0126 |

---

## Mass Spectrum List Report

---

| #   | m/z      | Res.  | S/N     | I       | I%   | FWHM   |
|-----|----------|-------|---------|---------|------|--------|
| 96  | 319.2156 | 26827 | 719.6   | 31099   | 0.9  | 0.0119 |
| 97  | 320.2190 | 25613 | 135.6   | 5894    | 0.2  | 0.0125 |
| 98  | 322.8727 | 26805 | 318.9   | 14117   | 0.4  | 0.0120 |
| 99  | 323.2349 | 22172 | 41.1    | 1827    | 0.1  | 0.0146 |
| 100 | 324.0600 | 25987 | 64.3    | 2874    | 0.1  | 0.0125 |
| 101 | 324.8714 | 22792 | 110.8   | 4969    | 0.1  | 0.0143 |
| 102 | 332.0653 | 26487 | 271.8   | 12827   | 0.4  | 0.0125 |
| 103 | 333.0494 | 26295 | 2621.5  | 124719  | 3.6  | 0.0127 |
| 104 | 333.1459 | 20797 | 84.0    | 3999    | 0.1  | 0.0160 |
| 105 | 333.1737 | 25265 | 210.1   | 10002   | 0.3  | 0.0132 |
| 106 | 334.0529 | 26388 | 468.2   | 22450   | 0.6  | 0.0127 |
| 107 | 334.1773 | 24501 | 45.0    | 2158    | 0.1  | 0.0136 |
| 108 | 334.8724 | 19304 | 42.0    | 2018    | 0.1  | 0.0173 |
| 109 | 334.8963 | 15515 | 48.6    | 2337    | 0.1  | 0.0216 |
| 110 | 335.0487 | 16815 | 272.1   | 13090   | 0.4  | 0.0199 |
| 111 | 335.0839 | 19310 | 91.2    | 4389    | 0.1  | 0.0174 |
| 112 | 335.1259 | 12730 | 107.1   | 5151    | 0.1  | 0.0263 |
| 113 | 335.1896 | 24626 | 60000.8 | 2886149 | 82.9 | 0.0136 |
| 114 | 335.2492 | 8665  | 333.6   | 16049   | 0.5  | 0.0387 |
| 115 | 335.2703 | 10535 | 264.9   | 12742   | 0.4  | 0.0318 |
| 116 | 335.3441 | 20125 | 642.2   | 30896   | 0.9  | 0.0167 |
| 117 | 336.0514 | 11243 | 61.8    | 2981    | 0.1  | 0.0299 |
| 118 | 336.1332 | 15436 | 41.7    | 2012    | 0.1  | 0.0218 |
| 119 | 336.1930 | 25278 | 11984.4 | 578383  | 16.6 | 0.0133 |
| 120 | 336.3440 | 12217 | 50.4    | 2430    | 0.1  | 0.0275 |
| 121 | 337.1890 | 20893 | 4616.6  | 222868  | 6.4  | 0.0161 |
| 122 | 338.1914 | 24482 | 869.1   | 41981   | 1.2  | 0.0138 |
| 123 | 338.2268 | 16321 | 71.8    | 3467    | 0.1  | 0.0207 |
| 124 | 339.1944 | 23736 | 89.8    | 4333    | 0.1  | 0.0143 |
| 125 | 340.8487 | 20573 | 63.1    | 3040    | 0.1  | 0.0166 |
| 126 | 349.1688 | 26476 | 207.4   | 10240   | 0.3  | 0.0132 |
| 127 | 350.1721 | 26612 | 41.2    | 2039    | 0.1  | 0.0132 |
| 128 | 351.1677 | 17675 | 70.1    | 3478    | 0.1  | 0.0199 |
| 129 | 351.1837 | 24216 | 149.1   | 7398    | 0.2  | 0.0145 |
| 130 | 355.2868 | 26850 | 1973.4  | 99135   | 2.8  | 0.0132 |
| 131 | 356.2900 | 26132 | 427.5   | 21502   | 0.6  | 0.0136 |
| 132 | 357.2931 | 25280 | 50.0    | 2517    | 0.1  | 0.0141 |
| 133 | 361.1711 | 27507 | 126.1   | 6401    | 0.2  | 0.0131 |
| 134 | 363.1694 | 26253 | 58.6    | 2986    | 0.1  | 0.0138 |
| 135 | 364.0917 | 24791 | 51.0    | 2603    | 0.1  | 0.0147 |
| 136 | 364.9044 | 28060 | 44.4    | 2264    | 0.1  | 0.0130 |
| 137 | 366.8626 | 26642 | 40.8    | 2092    | 0.1  | 0.0138 |
| 138 | 372.0500 | 27554 | 53.9    | 2805    | 0.1  | 0.0135 |
| 139 | 375.1862 | 26188 | 339.6   | 17869   | 0.5  | 0.0143 |
| 140 | 376.1896 | 26138 | 70.9    | 3735    | 0.1  | 0.0144 |
| 141 | 377.1850 | 25741 | 143.2   | 7548    | 0.2  | 0.0147 |
| 142 | 378.8393 | 25994 | 52.0    | 2751    | 0.1  | 0.0146 |
| 143 | 380.8377 | 21648 | 38.8    | 2066    | 0.1  | 0.0176 |
| 144 | 380.8783 | 28059 | 150.0   | 7982    | 0.2  | 0.0136 |
| 145 | 381.1250 | 24650 | 67.3    | 3582    | 0.1  | 0.0155 |
| 146 | 381.1950 | 26426 | 94.3    | 5019    | 0.1  | 0.0144 |
| 147 | 382.8771 | 25501 | 43.9    | 2363    | 0.1  | 0.0150 |
| 148 | 383.2859 | 26906 | 39.1    | 2115    | 0.1  | 0.0142 |
| 149 | 384.1870 | 26731 | 220.5   | 11980   | 0.3  | 0.0144 |
| 150 | 385.1898 | 23667 | 52.4    | 2863    | 0.1  | 0.0163 |
| 151 | 385.3014 | 26476 | 57.2    | 3127    | 0.1  | 0.0146 |
| 152 | 386.0818 | 26305 | 233.9   | 12833   | 0.4  | 0.0147 |
| 153 | 386.1855 | 25845 | 106.3   | 5831    | 0.2  | 0.0149 |
| 154 | 386.2981 | 22843 | 65.5    | 3592    | 0.1  | 0.0169 |
| 155 | 387.0852 | 25135 | 49.2    | 2715    | 0.1  | 0.0154 |
| 156 | 390.2914 | 26346 | 43.4    | 2437    | 0.1  | 0.0148 |
| 157 | 391.1560 | 26936 | 95.7    | 5395    | 0.2  | 0.0145 |

---

## Mass Spectrum List Report

---

| #   | m/z      | Res.  | S/N    | I      | I %  | FWHM   |
|-----|----------|-------|--------|--------|------|--------|
| 158 | 396.3385 | 28023 | 46.7   | 2712   | 0.1  | 0.0141 |
| 159 | 396.8146 | 19956 | 53.6   | 3110   | 0.1  | 0.0199 |
| 160 | 404.8189 | 26039 | 29.5   | 1745   | 0.1  | 0.0155 |
| 161 | 407.1355 | 27369 | 42.0   | 2531   | 0.1  | 0.0149 |
| 162 | 408.0968 | 26700 | 970.5  | 58889  | 1.7  | 0.0153 |
| 163 | 409.1000 | 27138 | 239.5  | 14626  | 0.4  | 0.0151 |
| 164 | 410.0970 | 21249 | 86.8   | 5327   | 0.2  | 0.0193 |
| 165 | 410.1248 | 19702 | 34.4   | 2112   | 0.1  | 0.0208 |
| 166 | 413.1432 | 24684 | 16.9   | 1055   | 0.0  | 0.0167 |
| 167 | 413.2032 | 24086 | 10.5   | 654    | 0.0  | 0.0172 |
| 168 | 413.2662 | 25378 | 10.3   | 645    | 0.0  | 0.0163 |
| 169 | 417.0930 | 26785 | 415.7  | 26299  | 0.8  | 0.0156 |
| 170 | 418.0965 | 26922 | 81.4   | 5180   | 0.1  | 0.0155 |
| 171 | 419.0911 | 28065 | 356.5  | 22808  | 0.7  | 0.0149 |
| 172 | 420.0944 | 27126 | 67.5   | 4347   | 0.1  | 0.0155 |
| 173 | 420.8709 | 27239 | 31.2   | 2018   | 0.1  | 0.0155 |
| 174 | 421.0889 | 25947 | 84.5   | 5461   | 0.2  | 0.0162 |
| 175 | 424.1225 | 28003 | 91.3   | 6002   | 0.2  | 0.0151 |
| 176 | 426.1105 | 16455 | 91.5   | 6091   | 0.2  | 0.0259 |
| 177 | 429.2399 | 27654 | 855.1  | 57680  | 1.7  | 0.0155 |
| 178 | 430.2432 | 26677 | 220.2  | 14908  | 0.4  | 0.0161 |
| 179 | 431.2409 | 21601 | 78.8   | 5362   | 0.2  | 0.0200 |
| 180 | 433.1877 | 27455 | 55.0   | 3751   | 0.1  | 0.0158 |
| 181 | 436.2186 | 25916 | 7327.3 | 506520 | 14.6 | 0.0168 |
| 182 | 436.8449 | 28499 | 117.5  | 8174   | 0.2  | 0.0153 |
| 183 | 437.2219 | 26884 | 1946.9 | 135378 | 3.9  | 0.0163 |
| 184 | 438.2172 | 25564 | 3366.4 | 235506 | 6.8  | 0.0171 |
| 185 | 438.8434 | 24532 | 55.0   | 3864   | 0.1  | 0.0179 |
| 186 | 439.2202 | 26362 | 852.2  | 60037  | 1.7  | 0.0167 |
| 187 | 440.2234 | 26810 | 111.3  | 7869   | 0.2  | 0.0164 |
| 188 | 449.1618 | 28263 | 226.8  | 16394  | 0.5  | 0.0159 |
| 189 | 449.2203 | 20542 | 40.5   | 2929   | 0.1  | 0.0219 |
| 190 | 449.2358 | 19516 | 39.4   | 2849   | 0.1  | 0.0230 |
| 191 | 450.1651 | 28352 | 51.0   | 3709   | 0.1  | 0.0159 |
| 192 | 451.1612 | 24561 | 35.7   | 2615   | 0.1  | 0.0184 |
| 193 | 454.8208 | 23008 | 36.3   | 2693   | 0.1  | 0.0198 |
| 194 | 463.2183 | 25115 | 27.5   | 2075   | 0.1  | 0.0184 |
| 195 | 465.2098 | 19531 | 40.1   | 3035   | 0.1  | 0.0238 |
| 196 | 466.9205 | 28986 | 26.9   | 2042   | 0.1  | 0.0161 |
| 197 | 468.2635 | 26640 | 28.3   | 2157   | 0.1  | 0.0176 |
| 198 | 474.3281 | 27619 | 85.6   | 6582   | 0.2  | 0.0172 |
| 199 | 475.3313 | 27429 | 30.6   | 2357   | 0.1  | 0.0173 |
| 200 | 489.1547 | 25949 | 22.0   | 1748   | 0.1  | 0.0189 |
| 201 | 492.2814 | 27749 | 55.5   | 4445   | 0.1  | 0.0177 |
| 202 | 494.2800 | 27802 | 27.9   | 2248   | 0.1  | 0.0178 |
| 203 | 494.8504 | 28234 | 47.7   | 3845   | 0.1  | 0.0175 |
| 204 | 495.3228 | 25870 | 21.7   | 1751   | 0.1  | 0.0191 |
| 205 | 499.2245 | 28179 | 28.0   | 2325   | 0.1  | 0.0177 |
| 206 | 503.1914 | 27547 | 47.7   | 4128   | 0.1  | 0.0183 |
| 207 | 505.1281 | 27992 | 41.4   | 3658   | 0.1  | 0.0180 |
| 208 | 506.2195 | 27781 | 339.3  | 30239  | 0.9  | 0.0182 |
| 209 | 507.2224 | 26980 | 102.5  | 9244   | 0.3  | 0.0188 |
| 210 | 508.2198 | 21825 | 35.7   | 3228   | 0.1  | 0.0233 |
| 211 | 510.3495 | 27835 | 93.5   | 8560   | 0.2  | 0.0183 |
| 212 | 510.7863 | 22179 | 23.2   | 2127   | 0.1  | 0.0230 |
| 213 | 511.3529 | 27922 | 33.9   | 3136   | 0.1  | 0.0183 |
| 214 | 519.1653 | 27531 | 48.5   | 4731   | 0.1  | 0.0189 |
| 215 | 520.0179 | 27966 | 44.5   | 4373   | 0.1  | 0.0186 |
| 216 | 522.0165 | 27148 | 24.4   | 2427   | 0.1  | 0.0192 |
| 217 | 523.1041 | 24027 | 22.5   | 2243   | 0.1  | 0.0218 |
| 218 | 532.3314 | 29292 | 192.7  | 19706  | 0.6  | 0.0182 |
| 219 | 533.3349 | 27935 | 67.7   | 6943   | 0.2  | 0.0191 |

## Mass Spectrum List Report

| #   | m/z      | Res.  | S/N     | I       | I %  | FWHM   |
|-----|----------|-------|---------|---------|------|--------|
| 220 | 534.8429 | 29111 | 17.4    | 1795    | 0.1  | 0.0184 |
| 221 | 535.1287 | 27003 | 19.0    | 1953    | 0.1  | 0.0198 |
| 222 | 538.2658 | 28860 | 340.7   | 35332   | 1.0  | 0.0187 |
| 223 | 539.2690 | 28212 | 118.1   | 12263   | 0.4  | 0.0191 |
| 224 | 540.2647 | 27529 | 164.8   | 17165   | 0.5  | 0.0196 |
| 225 | 541.2675 | 27916 | 56.5    | 5895    | 0.2  | 0.0194 |
| 226 | 542.1235 | 27872 | 27.0    | 2822    | 0.1  | 0.0195 |
| 227 | 542.2676 | 20740 | 16.6    | 1743    | 0.1  | 0.0261 |
| 228 | 546.3107 | 27764 | 261.1   | 27596   | 0.8  | 0.0197 |
| 229 | 547.3141 | 28255 | 94.3    | 9981    | 0.3  | 0.0194 |
| 230 | 548.3058 | 27222 | 309.4   | 32854   | 0.9  | 0.0201 |
| 231 | 549.3089 | 28881 | 111.0   | 11815   | 0.3  | 0.0190 |
| 232 | 550.3077 | 23352 | 36.6    | 3904    | 0.1  | 0.0236 |
| 233 | 550.8172 | 29114 | 36.0    | 3841    | 0.1  | 0.0189 |
| 234 | 552.8157 | 26214 | 23.1    | 2480    | 0.1  | 0.0211 |
| 235 | 554.2607 | 27166 | 42.3    | 4562    | 0.1  | 0.0204 |
| 236 | 555.2603 | 22369 | 28.5    | 3075    | 0.1  | 0.0248 |
| 237 | 555.8169 | 20293 | 17.6    | 1898    | 0.1  | 0.0274 |
| 238 | 555.8989 | 24871 | 19.0    | 2049    | 0.1  | 0.0224 |
| 239 | 556.0099 | 20254 | 25.3    | 2733    | 0.1  | 0.0275 |
| 240 | 556.1684 | 19069 | 38.6    | 4174    | 0.1  | 0.0292 |
| 241 | 556.2765 | 27371 | 21236.2 | 2295032 | 65.9 | 0.0203 |
| 242 | 556.3809 | 13572 | 206.9   | 22360   | 0.6  | 0.0410 |
| 243 | 556.4751 | 20043 | 237.9   | 25706   | 0.7  | 0.0278 |
| 244 | 556.9334 | 19143 | 16.5    | 1783    | 0.1  | 0.0291 |
| 245 | 557.0517 | 24897 | 17.3    | 1874    | 0.1  | 0.0224 |
| 246 | 557.0807 | 24898 | 17.5    | 1894    | 0.1  | 0.0224 |
| 247 | 557.1047 | 24898 | 16.7    | 1814    | 0.1  | 0.0224 |
| 248 | 557.1635 | 25250 | 133.7   | 14495   | 0.4  | 0.0221 |
| 249 | 557.2799 | 27448 | 7462.4  | 808855  | 23.2 | 0.0203 |
| 250 | 557.4769 | 8790  | 35.9    | 3890    | 0.1  | 0.0634 |
| 251 | 557.6104 | 13587 | 17.7    | 1914    | 0.1  | 0.0410 |
| 252 | 557.6447 | 24910 | 17.8    | 1924    | 0.1  | 0.0224 |
| 253 | 557.6914 | 24911 | 17.1    | 1852    | 0.1  | 0.0224 |
| 254 | 557.7379 | 18685 | 18.8    | 2041    | 0.1  | 0.0298 |
| 255 | 557.7610 | 13082 | 16.9    | 1830    | 0.1  | 0.0426 |
| 256 | 557.8138 | 26276 | 19.7    | 2135    | 0.1  | 0.0212 |
| 257 | 557.8551 | 24915 | 19.1    | 2067    | 0.1  | 0.0224 |
| 258 | 557.9233 | 12458 | 20.6    | 2233    | 0.1  | 0.0448 |
| 259 | 557.9618 | 25354 | 21.5    | 2327    | 0.1  | 0.0220 |
| 260 | 558.0625 | 24919 | 23.4    | 2536    | 0.1  | 0.0224 |
| 261 | 558.0931 | 37380 | 23.5    | 2549    | 0.1  | 0.0149 |
| 262 | 558.1170 | 14952 | 22.4    | 2431    | 0.1  | 0.0373 |
| 263 | 558.1670 | 17156 | 60.8    | 6586    | 0.2  | 0.0325 |
| 264 | 558.2756 | 25866 | 10166.1 | 1101827 | 31.7 | 0.0216 |
| 265 | 558.4718 | 18697 | 53.8    | 5825    | 0.2  | 0.0299 |
| 266 | 559.1690 | 15585 | 20.4    | 2204    | 0.1  | 0.0359 |
| 267 | 559.2783 | 27264 | 3364.5  | 363741  | 10.4 | 0.0205 |
| 268 | 560.2813 | 28285 | 571.6   | 61691   | 1.8  | 0.0198 |
| 269 | 561.2851 | 24891 | 70.9    | 7654    | 0.2  | 0.0225 |
| 270 | 563.1340 | 27798 | 36.0    | 3891    | 0.1  | 0.0203 |
| 271 | 563.3175 | 26226 | 18.4    | 1984    | 0.1  | 0.0215 |
| 272 | 564.3216 | 26520 | 19.9    | 2152    | 0.1  | 0.0213 |
| 273 | 566.1523 | 25737 | 16.9    | 1830    | 0.1  | 0.0220 |
| 274 | 568.7930 | 24074 | 19.9    | 2177    | 0.1  | 0.0236 |
| 275 | 569.2716 | 29279 | 598.1   | 65313   | 1.9  | 0.0194 |
| 276 | 569.4329 | 24512 | 17.5    | 1909    | 0.1  | 0.0232 |
| 277 | 570.2749 | 28673 | 212.8   | 23368   | 0.7  | 0.0199 |
| 278 | 571.2706 | 26787 | 286.5   | 31639   | 0.9  | 0.0213 |
| 279 | 572.2733 | 27320 | 104.2   | 11591   | 0.3  | 0.0209 |
| 280 | 572.4509 | 26991 | 22.9    | 2545    | 0.1  | 0.0212 |
| 281 | 573.1373 | 28992 | 376.7   | 42004   | 1.2  | 0.0198 |

---

## Mass Spectrum List Report

---

| #   | m/z      | Res.  | S/N    | I       | I %  | FWHM   |
|-----|----------|-------|--------|---------|------|--------|
| 282 | 573.2759 | 20297 | 24.4   | 2718    | 0.1  | 0.0282 |
| 283 | 574.1407 | 28869 | 129.5  | 14416   | 0.4  | 0.0199 |
| 284 | 574.4667 | 27556 | 6421.2 | 714721  | 20.5 | 0.0208 |
| 285 | 575.1389 | 22375 | 48.4   | 5386    | 0.2  | 0.0257 |
| 286 | 575.4700 | 28213 | 2543.5 | 282484  | 8.1  | 0.0204 |
| 287 | 576.1401 | 18240 | 15.8   | 1755    | 0.1  | 0.0316 |
| 288 | 576.4734 | 28950 | 477.2  | 52909   | 1.5  | 0.0199 |
| 289 | 577.4766 | 29487 | 63.9   | 7082    | 0.2  | 0.0196 |
| 290 | 582.1266 | 28568 | 61.6   | 6941    | 0.2  | 0.0204 |
| 291 | 583.1296 | 27465 | 21.9   | 2488    | 0.1  | 0.0212 |
| 292 | 583.3237 | 30251 | 21.9   | 2487    | 0.1  | 0.0193 |
| 293 | 586.3035 | 29522 | 116.7  | 13523   | 0.4  | 0.0199 |
| 294 | 587.3066 | 28445 | 42.9   | 4997    | 0.1  | 0.0206 |
| 295 | 589.1008 | 28082 | 30.0   | 3517    | 0.1  | 0.0210 |
| 296 | 591.0571 | 25567 | 30.6   | 3614    | 0.1  | 0.0231 |
| 297 | 591.1019 | 22382 | 15.3   | 1807    | 0.1  | 0.0264 |
| 298 | 592.4771 | 29016 | 18.8   | 2225    | 0.1  | 0.0204 |
| 299 | 593.0558 | 23734 | 16.7   | 1983    | 0.1  | 0.0250 |
| 300 | 593.4617 | 25856 | 57.5   | 6840    | 0.2  | 0.0230 |
| 301 | 594.4648 | 27546 | 22.7   | 2714    | 0.1  | 0.0216 |
| 302 | 596.0954 | 29068 | 19.7   | 2365    | 0.1  | 0.0205 |
| 303 | 602.2775 | 29451 | 219.7  | 26940   | 0.8  | 0.0205 |
| 304 | 603.2808 | 28436 | 78.5   | 9636    | 0.3  | 0.0212 |
| 305 | 604.2799 | 23756 | 27.9   | 3428    | 0.1  | 0.0254 |
| 306 | 608.8226 | 28342 | 24.9   | 3118    | 0.1  | 0.0215 |
| 307 | 609.2659 | 29415 | 458.8  | 57379   | 1.6  | 0.0207 |
| 308 | 610.2485 | 27340 | 5793.8 | 724334  | 20.8 | 0.0223 |
| 309 | 610.5149 | 12918 | 14.8   | 1855    | 0.1  | 0.0473 |
| 310 | 610.8216 | 18430 | 15.3   | 1911    | 0.1  | 0.0331 |
| 311 | 611.2526 | 25947 | 2110.3 | 263731  | 7.6  | 0.0236 |
| 312 | 612.2477 | 26379 | 2834.8 | 353828  | 10.2 | 0.0232 |
| 313 | 613.2503 | 28205 | 931.1  | 116273  | 3.3  | 0.0217 |
| 314 | 614.2533 | 27682 | 156.3  | 19512   | 0.6  | 0.0222 |
| 315 | 614.3371 | 13393 | 15.6   | 1952    | 0.1  | 0.0459 |
| 316 | 615.2563 | 26436 | 20.3   | 2534    | 0.1  | 0.0233 |
| 317 | 615.4434 | 29756 | 213.3  | 26677   | 0.8  | 0.0207 |
| 318 | 616.4467 | 30090 | 84.7   | 10600   | 0.3  | 0.0205 |
| 319 | 617.4500 | 28369 | 18.4   | 2304    | 0.1  | 0.0218 |
| 320 | 618.0776 | 29035 | 20.9   | 2617    | 0.1  | 0.0213 |
| 321 | 618.2413 | 26659 | 17.7   | 2213    | 0.1  | 0.0232 |
| 322 | 620.1917 | 28486 | 18.7   | 2357    | 0.1  | 0.0218 |
| 323 | 621.3775 | 28817 | 33.3   | 4203    | 0.1  | 0.0216 |
| 324 | 622.3812 | 26611 | 13.8   | 1745    | 0.1  | 0.0234 |
| 325 | 623.1961 | 27430 | 14.8   | 1884    | 0.1  | 0.0227 |
| 326 | 623.2443 | 29022 | 17.5   | 2222    | 0.1  | 0.0215 |
| 327 | 623.2696 | 10794 | 15.9   | 2022    | 0.1  | 0.0577 |
| 328 | 623.3934 | 27716 | 8794.9 | 1117308 | 32.1 | 0.0225 |
| 329 | 623.6019 | 19570 | 48.3   | 6143    | 0.2  | 0.0319 |
| 330 | 623.6676 | 13600 | 21.7   | 2760    | 0.1  | 0.0459 |
| 331 | 624.3968 | 28056 | 3477.3 | 440889  | 12.7 | 0.0223 |
| 332 | 624.7584 | 13033 | 18.4   | 2331    | 0.1  | 0.0479 |
| 333 | 625.2363 | 13417 | 17.6   | 2232    | 0.1  | 0.0466 |
| 334 | 625.3927 | 26101 | 4301.5 | 544613  | 15.6 | 0.0240 |
| 335 | 625.6666 | 9784  | 14.0   | 1769    | 0.1  | 0.0639 |
| 336 | 626.3953 | 28099 | 1587.1 | 200630  | 5.8  | 0.0223 |
| 337 | 627.3984 | 29436 | 295.1  | 37256   | 1.1  | 0.0213 |
| 338 | 628.4016 | 27021 | 37.1   | 4678    | 0.1  | 0.0233 |
| 339 | 629.4018 | 26622 | 44.4   | 5610    | 0.2  | 0.0236 |
| 340 | 630.2092 | 27481 | 13.9   | 1754    | 0.1  | 0.0229 |
| 341 | 630.4048 | 26195 | 18.3   | 2308    | 0.1  | 0.0241 |
| 342 | 631.4173 | 27655 | 6642.8 | 838854  | 24.1 | 0.0228 |
| 343 | 631.6941 | 11385 | 15.8   | 1996    | 0.1  | 0.0555 |



---

## Mass Spectrum List Report

---

| #   | m/z      | Res.  | S/N     | I       | I %  | FWHM   |
|-----|----------|-------|---------|---------|------|--------|
| 344 | 632.0280 | 18991 | 17.7    | 2228    | 0.1  | 0.0333 |
| 345 | 632.2092 | 13211 | 15.7    | 1980    | 0.1  | 0.0479 |
| 346 | 632.4208 | 28122 | 2643.2  | 333469  | 9.6  | 0.0225 |
| 347 | 633.4203 | 25061 | 884.0   | 111298  | 3.2  | 0.0253 |
| 348 | 634.0515 | 29057 | 1491.6  | 187770  | 5.4  | 0.0218 |
| 349 | 634.4210 | 25698 | 236.0   | 29671   | 0.9  | 0.0247 |
| 350 | 635.0547 | 29379 | 452.3   | 56848   | 1.6  | 0.0216 |
| 351 | 635.4233 | 25377 | 44.2    | 5554    | 0.2  | 0.0250 |
| 352 | 636.0503 | 27632 | 789.6   | 99116   | 2.8  | 0.0230 |
| 353 | 636.2634 | 22754 | 18.6    | 2334    | 0.1  | 0.0280 |
| 354 | 637.0532 | 28481 | 240.1   | 30126   | 0.9  | 0.0224 |
| 355 | 637.3724 | 28304 | 60.5    | 7593    | 0.2  | 0.0225 |
| 356 | 638.0518 | 24759 | 78.1    | 9802    | 0.3  | 0.0258 |
| 357 | 638.3757 | 25368 | 25.3    | 3175    | 0.1  | 0.0252 |
| 358 | 638.5196 | 23060 | 19.1    | 2396    | 0.1  | 0.0277 |
| 359 | 639.0541 | 16767 | 31.4    | 3939    | 0.1  | 0.0381 |
| 360 | 639.1930 | 13335 | 19.7    | 2465    | 0.1  | 0.0479 |
| 361 | 639.2640 | 19992 | 25.0    | 3132    | 0.1  | 0.0320 |
| 362 | 639.3883 | 27786 | 12353.3 | 1548990 | 44.5 | 0.0230 |
| 363 | 639.5997 | 15881 | 83.1    | 10418   | 0.3  | 0.0403 |
| 364 | 639.6705 | 10159 | 28.3    | 3548    | 0.1  | 0.0630 |
| 365 | 640.2668 | 26692 | 14.0    | 1758    | 0.1  | 0.0240 |
| 366 | 640.3917 | 28078 | 4861.1  | 609410  | 17.5 | 0.0228 |
| 367 | 640.6728 | 20025 | 18.7    | 2339    | 0.1  | 0.0320 |
| 368 | 641.0701 | 26709 | 14.2    | 1781    | 0.1  | 0.0240 |
| 369 | 641.0991 | 26709 | 14.3    | 1797    | 0.1  | 0.0240 |
| 370 | 641.1465 | 26710 | 15.0    | 1880    | 0.1  | 0.0240 |
| 371 | 641.2638 | 20361 | 17.7    | 2215    | 0.1  | 0.0315 |
| 372 | 641.3877 | 26395 | 6119.9  | 767544  | 22.0 | 0.0243 |
| 373 | 641.6730 | 8607  | 19.4    | 2438    | 0.1  | 0.0746 |
| 374 | 642.3903 | 27816 | 2181.6  | 273637  | 7.9  | 0.0231 |
| 375 | 643.3934 | 29963 | 418.5   | 52462   | 1.5  | 0.0215 |
| 376 | 644.3965 | 26977 | 53.9    | 6751    | 0.2  | 0.0239 |
| 377 | 645.3968 | 28491 | 40.6    | 5090    | 0.1  | 0.0227 |
| 378 | 646.4005 | 23411 | 14.6    | 1830    | 0.1  | 0.0276 |
| 379 | 647.4106 | 25401 | 27.7    | 3476    | 0.1  | 0.0255 |
| 380 | 648.2045 | 28813 | 97.4    | 12221   | 0.4  | 0.0225 |
| 381 | 649.2076 | 30451 | 38.1    | 4777    | 0.1  | 0.0213 |
| 382 | 650.2033 | 27798 | 53.3    | 6678    | 0.2  | 0.0234 |
| 383 | 651.2065 | 27953 | 18.4    | 2299    | 0.1  | 0.0233 |
| 384 | 651.5146 | 30540 | 170.6   | 21352   | 0.6  | 0.0213 |
| 385 | 652.5178 | 29050 | 71.1    | 8890    | 0.3  | 0.0225 |
| 386 | 653.5209 | 28065 | 15.6    | 1953    | 0.1  | 0.0233 |
| 387 | 655.3682 | 19324 | 103.2   | 12914   | 0.4  | 0.0339 |
| 388 | 656.3713 | 18080 | 40.8    | 5114    | 0.1  | 0.0363 |
| 389 | 657.3673 | 18646 | 55.4    | 6948    | 0.2  | 0.0353 |
| 390 | 658.0751 | 30008 | 19.6    | 2454    | 0.1  | 0.0219 |
| 391 | 658.3695 | 20892 | 21.2    | 2665    | 0.1  | 0.0315 |
| 392 | 663.3995 | 29203 | 350.6   | 44167   | 1.3  | 0.0227 |
| 393 | 664.4029 | 30281 | 149.5   | 18814   | 0.5  | 0.0219 |
| 394 | 665.3989 | 26732 | 186.0   | 23397   | 0.7  | 0.0249 |
| 395 | 666.4016 | 27944 | 71.4    | 8973    | 0.3  | 0.0238 |
| 396 | 666.7877 | 25200 | 15.7    | 1970    | 0.1  | 0.0265 |
| 397 | 667.3701 | 26939 | 30.7    | 3857    | 0.1  | 0.0248 |
| 398 | 667.4002 | 18717 | 26.8    | 3363    | 0.1  | 0.0357 |
| 399 | 669.3694 | 25674 | 28.0    | 3505    | 0.1  | 0.0261 |
| 400 | 677.4226 | 28759 | 17.9    | 2246    | 0.1  | 0.0236 |
| 401 | 682.7636 | 24098 | 17.6    | 2181    | 0.1  | 0.0283 |
| 402 | 697.3265 | 28125 | 21.5    | 2595    | 0.1  | 0.0248 |
| 403 | 699.3247 | 26399 | 18.3    | 2212    | 0.1  | 0.0265 |
| 404 | 704.3246 | 30565 | 73.9    | 8850    | 0.3  | 0.0230 |
| 405 | 705.3277 | 28403 | 34.4    | 4116    | 0.1  | 0.0248 |

---

## Mass Spectrum List Report

---

| #   | m/z      | Res.  | S/N    | I      | I % | FWHM   |
|-----|----------|-------|--------|--------|-----|--------|
| 406 | 708.7790 | 28645 | 16.4   | 1956   | 0.1 | 0.0247 |
| 407 | 712.3261 | 28898 | 678.4  | 80848  | 2.3 | 0.0246 |
| 408 | 713.3285 | 27828 | 310.5  | 36974  | 1.1 | 0.0256 |
| 409 | 714.3250 | 28310 | 664.2  | 79012  | 2.3 | 0.0252 |
| 410 | 715.3270 | 27243 | 268.9  | 31948  | 0.9 | 0.0263 |
| 411 | 716.3247 | 26407 | 176.1  | 20915  | 0.6 | 0.0271 |
| 412 | 717.3357 | 20075 | 102.4  | 12138  | 0.3 | 0.0357 |
| 413 | 718.3424 | 22292 | 33.5   | 3966   | 0.1 | 0.0322 |
| 414 | 719.3401 | 28435 | 63.9   | 7568   | 0.2 | 0.0253 |
| 415 | 720.3451 | 27282 | 31.3   | 3700   | 0.1 | 0.0264 |
| 416 | 721.2921 | 29063 | 188.5  | 22307  | 0.6 | 0.0248 |
| 417 | 722.2956 | 29527 | 76.4   | 9038   | 0.3 | 0.0245 |
| 418 | 722.3362 | 19160 | 21.8   | 2583   | 0.1 | 0.0377 |
| 419 | 722.7948 | 30108 | 31.5   | 3730   | 0.1 | 0.0240 |
| 420 | 723.2903 | 28836 | 244.7  | 28960  | 0.8 | 0.0251 |
| 421 | 724.2935 | 29314 | 94.5   | 11175  | 0.3 | 0.0247 |
| 422 | 724.7936 | 27714 | 17.5   | 2069   | 0.1 | 0.0262 |
| 423 | 725.2892 | 27580 | 103.2  | 12196  | 0.4 | 0.0263 |
| 424 | 725.4676 | 29720 | 105.8  | 12506  | 0.4 | 0.0244 |
| 425 | 726.2918 | 27978 | 37.1   | 4381   | 0.1 | 0.0260 |
| 426 | 726.4711 | 29111 | 47.2   | 5572   | 0.2 | 0.0250 |
| 427 | 727.2887 | 24990 | 18.9   | 2226   | 0.1 | 0.0291 |
| 428 | 727.4713 | 26080 | 18.2   | 2146   | 0.1 | 0.0279 |
| 429 | 728.3208 | 27118 | 25.6   | 3020   | 0.1 | 0.0269 |
| 430 | 730.3184 | 23896 | 27.9   | 3288   | 0.1 | 0.0306 |
| 431 | 745.3897 | 27255 | 15.7   | 1824   | 0.1 | 0.0273 |
| 432 | 746.4805 | 27237 | 19.0   | 2207   | 0.1 | 0.0274 |
| 433 | 748.0238 | 29731 | 27.1   | 3155   | 0.1 | 0.0252 |
| 434 | 750.0225 | 28739 | 17.4   | 2024   | 0.1 | 0.0261 |
| 435 | 761.3317 | 28671 | 22.6   | 2564   | 0.1 | 0.0266 |
| 436 | 763.3308 | 27736 | 20.7   | 2350   | 0.1 | 0.0275 |
| 437 | 796.7374 | 27509 | 24.1   | 2510   | 0.1 | 0.0290 |
| 438 | 802.4476 | 29719 | 112.6  | 11451  | 0.3 | 0.0270 |
| 439 | 803.4504 | 28436 | 58.7   | 5955   | 0.2 | 0.0283 |
| 440 | 804.4505 | 24586 | 22.7   | 2300   | 0.1 | 0.0327 |
| 441 | 810.4184 | 29424 | 121.8  | 12221  | 0.4 | 0.0275 |
| 442 | 811.4217 | 29072 | 61.1   | 6126   | 0.2 | 0.0279 |
| 443 | 812.4183 | 27537 | 67.6   | 6763   | 0.2 | 0.0295 |
| 444 | 813.4201 | 27776 | 30.1   | 3007   | 0.1 | 0.0293 |
| 445 | 842.5673 | 29348 | 21.6   | 2040   | 0.1 | 0.0287 |
| 446 | 850.5382 | 30368 | 129.8  | 11996  | 0.3 | 0.0280 |
| 447 | 851.5414 | 30993 | 72.1   | 6656   | 0.2 | 0.0275 |
| 448 | 852.5382 | 28363 | 75.6   | 6966   | 0.2 | 0.0301 |
| 449 | 853.5407 | 28274 | 33.7   | 3097   | 0.1 | 0.0302 |
| 450 | 898.4316 | 30258 | 177.8  | 14641  | 0.4 | 0.0297 |
| 451 | 899.4346 | 30332 | 97.2   | 7985   | 0.2 | 0.0297 |
| 452 | 900.4308 | 29295 | 186.8  | 15333  | 0.4 | 0.0307 |
| 453 | 901.4334 | 30118 | 92.6   | 7598   | 0.2 | 0.0299 |
| 454 | 902.4316 | 27187 | 55.9   | 4582   | 0.1 | 0.0332 |
| 455 | 903.4327 | 27817 | 24.7   | 2019   | 0.1 | 0.0325 |
| 456 | 911.6715 | 31037 | 509.1  | 40668  | 1.2 | 0.0294 |
| 457 | 912.6749 | 29070 | 289.3  | 23099  | 0.7 | 0.0314 |
| 458 | 913.6784 | 30075 | 91.2   | 7267   | 0.2 | 0.0304 |
| 459 | 915.4619 | 26657 | 45.9   | 3644   | 0.1 | 0.0343 |
| 460 | 916.4664 | 26067 | 29.6   | 2351   | 0.1 | 0.0352 |
| 461 | 917.4606 | 24387 | 40.2   | 3189   | 0.1 | 0.0376 |
| 462 | 918.4626 | 27895 | 24.2   | 1915   | 0.1 | 0.0329 |
| 463 | 927.6456 | 29800 | 2041.8 | 159312 | 4.6 | 0.0311 |
| 464 | 928.6490 | 30222 | 1206.5 | 94097  | 2.7 | 0.0307 |
| 465 | 929.6501 | 28431 | 468.0  | 36470  | 1.0 | 0.0327 |
| 466 | 930.2796 | 30265 | 560.2  | 43648  | 1.3 | 0.0307 |
| 467 | 930.6510 | 27026 | 147.0  | 11451  | 0.3 | 0.0344 |

---

## Mass Spectrum List Report

---

| #   | m/z       | Res.  | S/N    | I     | I % | FWHM   |
|-----|-----------|-------|--------|-------|-----|--------|
| 468 | 931.2828  | 29784 | 281.0  | 21880 | 0.6 | 0.0313 |
| 469 | 931.6528  | 25746 | 36.9   | 2872  | 0.1 | 0.0362 |
| 470 | 932.2797  | 28749 | 340.8  | 26522 | 0.8 | 0.0324 |
| 471 | 933.2818  | 29381 | 153.3  | 11921 | 0.3 | 0.0318 |
| 472 | 934.2825  | 27480 | 53.1   | 4124  | 0.1 | 0.0340 |
| 473 | 943.6329  | 30009 | 239.0  | 18156 | 0.5 | 0.0314 |
| 474 | 944.4324  | 29254 | 25.5   | 1932  | 0.1 | 0.0323 |
| 475 | 944.6362  | 30308 | 152.4  | 11549 | 0.3 | 0.0312 |
| 476 | 945.6336  | 28057 | 142.7  | 10786 | 0.3 | 0.0337 |
| 477 | 946.6353  | 28303 | 75.9   | 5726  | 0.2 | 0.0334 |
| 478 | 947.6382  | 28016 | 23.2   | 1747  | 0.1 | 0.0338 |
| 479 | 952.4034  | 30990 | 166.0  | 12294 | 0.4 | 0.0307 |
| 480 | 953.4068  | 29893 | 85.5   | 6313  | 0.2 | 0.0319 |
| 481 | 954.4029  | 29194 | 158.5  | 11658 | 0.3 | 0.0327 |
| 482 | 955.4054  | 30531 | 85.2   | 6251  | 0.2 | 0.0313 |
| 483 | 956.4035  | 27330 | 53.5   | 3915  | 0.1 | 0.0350 |
| 484 | 992.5596  | 30707 | 1156.5 | 78540 | 2.3 | 0.0323 |
| 485 | 993.5628  | 30682 | 701.7  | 47641 | 1.4 | 0.0324 |
| 486 | 994.5592  | 29355 | 1214.5 | 82433 | 2.4 | 0.0339 |
| 487 | 995.5615  | 29716 | 634.5  | 43032 | 1.2 | 0.0335 |
| 488 | 996.5600  | 28049 | 376.6  | 25514 | 0.7 | 0.0355 |
| 489 | 997.5614  | 27750 | 164.6  | 11134 | 0.3 | 0.0359 |
| 490 | 998.5645  | 26019 | 48.8   | 3293  | 0.1 | 0.0384 |
| 491 | 1001.5253 | 31290 | 404.7  | 27157 | 0.8 | 0.0320 |
| 492 | 1002.5285 | 30827 | 235.3  | 15764 | 0.5 | 0.0325 |
| 493 | 1003.5243 | 29886 | 546.5  | 36535 | 1.0 | 0.0336 |
| 494 | 1004.5269 | 31163 | 299.7  | 20016 | 0.6 | 0.0322 |
| 495 | 1005.5240 | 27930 | 255.6  | 17049 | 0.5 | 0.0360 |
| 496 | 1006.5253 | 28722 | 122.7  | 8171  | 0.2 | 0.0350 |
| 497 | 1007.5248 | 26934 | 54.7   | 3629  | 0.1 | 0.0374 |
| 498 | 1008.5536 | 27823 | 96.8   | 6420  | 0.2 | 0.0362 |
| 499 | 1009.5562 | 28151 | 64.8   | 4286  | 0.1 | 0.0359 |
| 500 | 1010.5542 | 28473 | 97.4   | 6441  | 0.2 | 0.0355 |
| 501 | 1011.5554 | 29390 | 61.9   | 4086  | 0.1 | 0.0344 |
| 502 | 1012.5528 | 28042 | 55.2   | 3635  | 0.1 | 0.0361 |
| 503 | 1013.5544 | 26991 | 29.2   | 1923  | 0.1 | 0.0376 |
| 504 | 1041.5647 | 30618 | 134.9  | 8559  | 0.2 | 0.0340 |
| 505 | 1042.5681 | 29478 | 79.3   | 5027  | 0.1 | 0.0354 |
| 506 | 1043.5643 | 29603 | 140.4  | 8883  | 0.3 | 0.0353 |
| 507 | 1044.4814 | 29694 | 42.4   | 2679  | 0.1 | 0.0352 |
| 508 | 1044.5667 | 28960 | 81.8   | 5169  | 0.1 | 0.0361 |
| 509 | 1045.4839 | 27347 | 31.3   | 1975  | 0.1 | 0.0382 |
| 510 | 1045.5652 | 27235 | 51.1   | 3228  | 0.1 | 0.0384 |
| 511 | 1046.4813 | 28938 | 49.7   | 3135  | 0.1 | 0.0362 |
| 512 | 1047.4817 | 27317 | 36.9   | 2328  | 0.1 | 0.0383 |
| 513 | 1098.6758 | 30493 | 70.2   | 4038  | 0.1 | 0.0360 |
| 514 | 1099.6784 | 28493 | 47.8   | 2744  | 0.1 | 0.0386 |
| 515 | 1116.5970 | 29115 | 36.2   | 2012  | 0.1 | 0.0384 |
| 516 | 1272.7932 | 32100 | 201.0  | 9918  | 0.3 | 0.0397 |
| 517 | 1273.7967 | 30076 | 156.7  | 7725  | 0.2 | 0.0424 |
| 518 | 1274.7935 | 30222 | 240.3  | 11837 | 0.3 | 0.0422 |
| 519 | 1275.7957 | 31120 | 155.3  | 7648  | 0.2 | 0.0410 |
| 520 | 1276.7954 | 29451 | 93.7   | 4614  | 0.1 | 0.0434 |
| 521 | 1277.7957 | 28707 | 47.4   | 2333  | 0.1 | 0.0445 |
| 522 | 1288.7875 | 30629 | 46.9   | 2297  | 0.1 | 0.0421 |
| 523 | 1289.7919 | 29180 | 39.2   | 1918  | 0.1 | 0.0442 |
| 524 | 1290.7886 | 28281 | 53.1   | 2599  | 0.1 | 0.0456 |
| 525 | 1291.7905 | 28082 | 39.4   | 1934  | 0.1 | 0.0460 |
